# Supplementary material for: Azulene-based fluorescent chemosensor for adenosine diphosphate
Source: Royal Society of Chemistry journal article supplement (doi:10.1039/d1cc04122c), 2021-01-01
Supplement: d1cc04122c1.pdf [file d1cc04122c1.pdf]

## **Azulene-based fluorescent chemosensor for adenosine diphosphate.**

Carlos M. López-Allied,<sup>a,b</sup> Sang Jun Park,<sup>c</sup> Dong Joon Lee,<sup>c</sup> Lloyd C. Murfin,<sup>a</sup> Gabriele Kociok-Köhn,<sup>d</sup> Jodie L. Hann,<sup>a</sup> Jannis Wenk,<sup>b,e,\*</sup> Tony D. James,<sup>a,b,\*</sup> Hwan Myung Kim,<sup>c,\*</sup> and Simon E. Lewis,<sup>a,b,\*</sup>

- a. Department of Chemistry, University of Bath, Bath, BA2 7AY, UK.  
b. Centre for Sustainable Circular Technologies, University of Bath, Bath, BA2 7AY, UK. Email: T.D.James@bath.ac.uk, J.H.Wenk@bath.ac.uk, S.E.Lewis@bath.ac.uk  
c. Department of Energy Systems Research, Ajou University, Suwon 443-749, South Korea. Email: kimhm@ajou.ac.kr  
d. Material and Chemical Characterisation Facility (MC<sup>2</sup>), University of Bath, Bath, BA2 7AY, UK.  
e. Department of Chemical Engineering, University of Bath, Bath, BA2 7AY, UK.

## **ELECTRONIC SUPPORTING INFORMATION**

|                                         |          |
|-----------------------------------------|----------|
| General Experimental Details . . . . .  | Page S2  |
| UV/Vis absorption spectra . . . . .     | Page S3  |
| Fluorescence data and spectra . . . . . | Page S7  |
| Synthetic Procedures . . . . .          | Page S14 |
| NMR spectra . . . . .                   | Page S20 |
| X-ray crystallographic data . . . . .   | Page S35 |
| References . . . . .                    | Page S55 |

## **General Experimental Details**

**Synthetic chemistry and compound characterisation.** Azulene was purchased from Alfa Aesar. All other reagents were purchased from Merck. Reactions were carried out under an atmosphere of N<sub>2</sub>, through the use of a Schlenk line. Solvent was deoxygenated by channelling a stream of N<sub>2</sub> through the liquid (sparging). Thin layer chromatography (TLC) was carried out on aluminium plates coated with silica gel (Alugram®SIL G/UV 254 nm), and visualisation was achieved by the naked eye (for coloured azulene compounds) and with UV light. Solvents were removed using Büchi rotary evaporators and with high vacuum on a Schlenk line. Flash column chromatography was carried out using Davisil LC 60 Å silica gel (35-70 micron) purchased from Sigma-Aldrich. IR spectra were recorded on a Perkin-Elmer 1600 FT-IR instrument. Capillary melting points were recorded on a Büchi 535 melting point apparatus and are uncorrected. UV-Vis experiments were performed on a Shimadzu UV-1800 UV spectrometer, for which a quartz cuvette of 1 cm path length was used. Fluorescence measurements, unless stated otherwise in the figure caption, were performed on a BMG Labtech CLARIOstar® using Greiner bio-one microplates, 96 well, PS, f-bottom (chimney well), black walled. Data were collected *via* the BMG Labtech Clariostar data analysis software package MARS. All solvents used in fluorescence measurements were HPLC or fluorescence grade and the water was de-ionized. All pH measurements taken during fluorescence/absorption experiments were recorded on a Hanna Instruments HI 9321 Microprocessor pH meter which was routinely calibrated using Fisher Chemicals standard buffer solutions (pH 4.0 - phthalate, 7.0 – phosphate, and 10.0 - borate). HEPES buffer was prepared by generating a 10 mM solution in DMSO/water (1/1, v/v) and adjusting with dilute HCl/NaOH to pH 7.3. <sup>1</sup>H and <sup>13</sup>C NMR spectra were obtained using a 500 MHz Agilent ProPulse 500 or a 300 MHz Bruker NMR spectrometer, for which proton decoupling was active for <sup>13</sup>C NMR. Mass spectrometry was conducted with a microTOF mass spectrometer, with electrospray ionisation (ESI) used as the ionisation method.

**Two-photon fluorescence microscopy.** Two-photon fluorescence images were acquired with multiphoton microscopes (Leica TCS SP8 MP) and spectral confocal with ×40 objective magnification. **1** was excited at 740 nm by mode-locked femtosecond Ti:Sapphire laser source (Mai Tai HP) with 3.40 W output power, which corresponded to about  $1.20 \times 10^6$  W cm<sup>-2</sup> in the focal plane.

**Cell culture.** All cells were cultured on a glass bottom cell culture dish (NEST) for 2 days with 37 °C, humidity and 5% CO<sub>2</sub> maintained. Before imaging, the medium was changed with serum-free medium and probe (10 μM) was stained. Cell culture medium for HeLa cells (ATCC) was used MEM (WelGene Inc) which was containing 10% FBS (WelGene), penicillin (100 units mL<sup>-1</sup>) and streptomycin (100 μg mL<sup>-1</sup>).

**Cell viability.** To confirm that the probe **1** could not affect viability of cells in our incubation and imaging conditions (200 μM ADP, 50 μM Zn<sup>2+</sup>, 10 μM Probe **1**), a CCK8 kit was used. 100 μL of HeLa cell suspension was dispensed in a 96-well plate (8000 cells/well). The plates were pre-incubated for 24 h in an incubator (37 °C, 5 % CO<sub>2</sub>). Then, various concentration of ADP, Zn<sup>2+</sup> and probe were added in each well. After addition of substances, further incubation of the plates was conducted for 0.5 h, 3 h and 24 h. Finally 10 μL of CCK8 solution was added to each well and the plates were incubated for 2 h at 37 °C, 5 % CO<sub>2</sub>. Using a microplate reader (Varioskan, Thermo Fisher), the absorbance at 450 nm was measured.

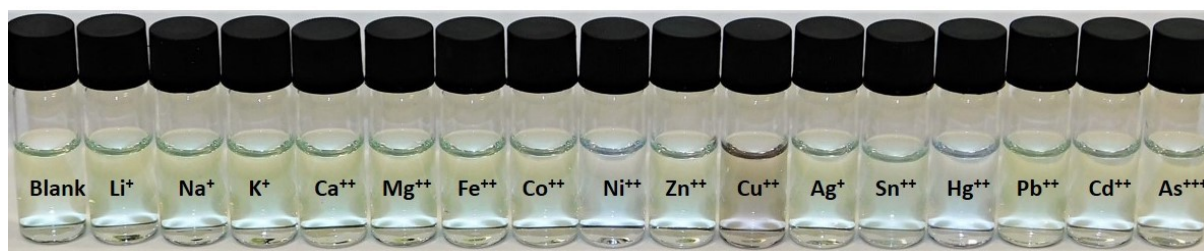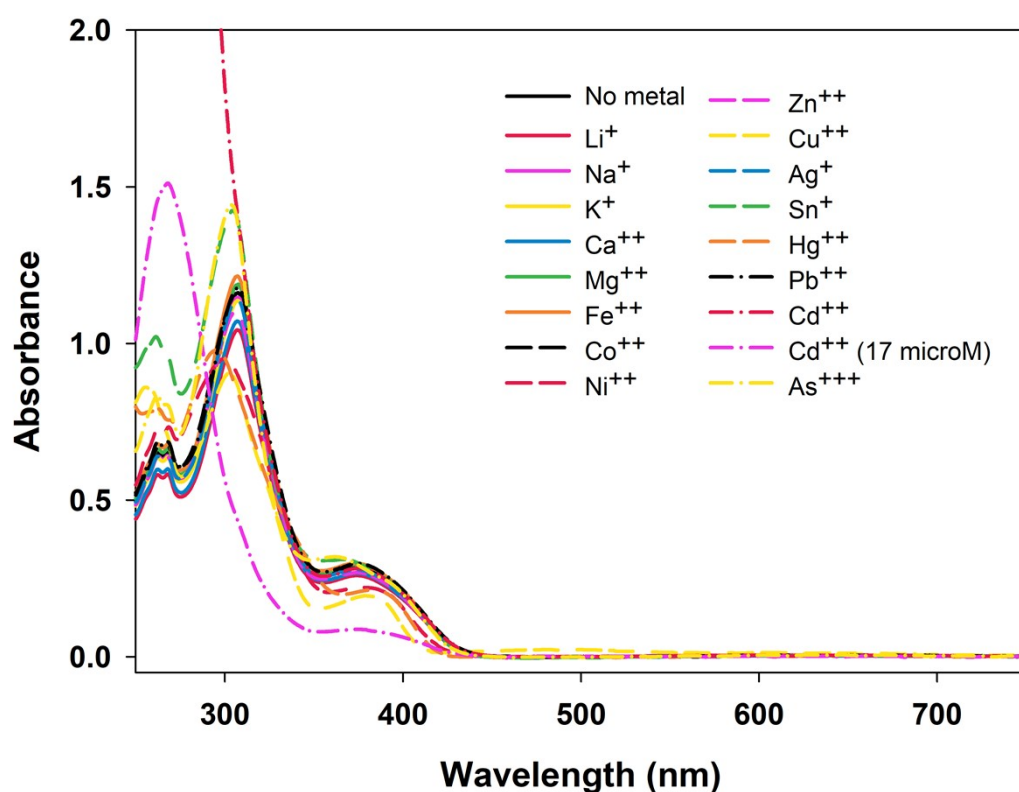

**Figure S1:** *Top.* Selectivity visual test for **1** (500  $\mu$ M) in the presence of LiCl (1 mM), NaCl (1 mM), KCl (1 mM), CaCl<sub>2</sub> (1 mM), Mg(NO<sub>3</sub>)<sub>2</sub> (1 mM), FeSO<sub>4</sub> (1 mM), Co(NO<sub>3</sub>)<sub>2</sub> (1 mM), Ni(acac)<sub>2</sub> (1 mM), Zn(NO<sub>3</sub>)<sub>2</sub> (1 mM), CuCl<sub>2</sub> (1 mM), AgNO<sub>3</sub> (1 mM), SnCl<sub>2</sub> (1 mM), Hg(NO<sub>3</sub>)<sub>2</sub> (1 mM), Pb(OAc)<sub>2</sub> (1 mM), Cd(OAc)<sub>2</sub> (1 mM) and As(NO<sub>3</sub>)<sub>3</sub> (1 mM). Spectra were measured after 30 min. The data were obtained in HEPES buffer 50 % H<sub>2</sub>O : 50 % MeCN, pH=7.3. *Bottom.* Absorbance spectra of the same solutions diluted  $\times 10$ .

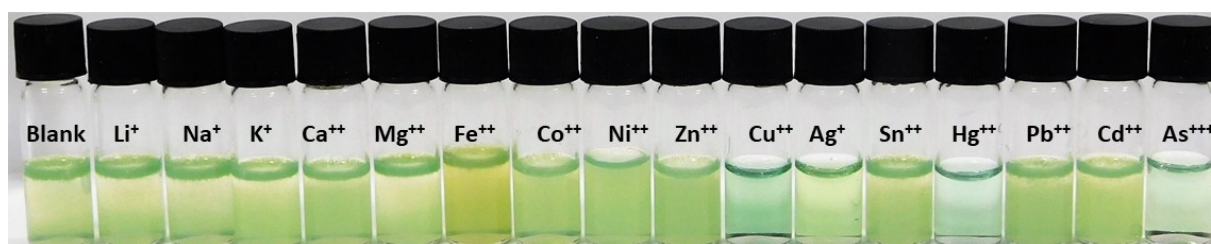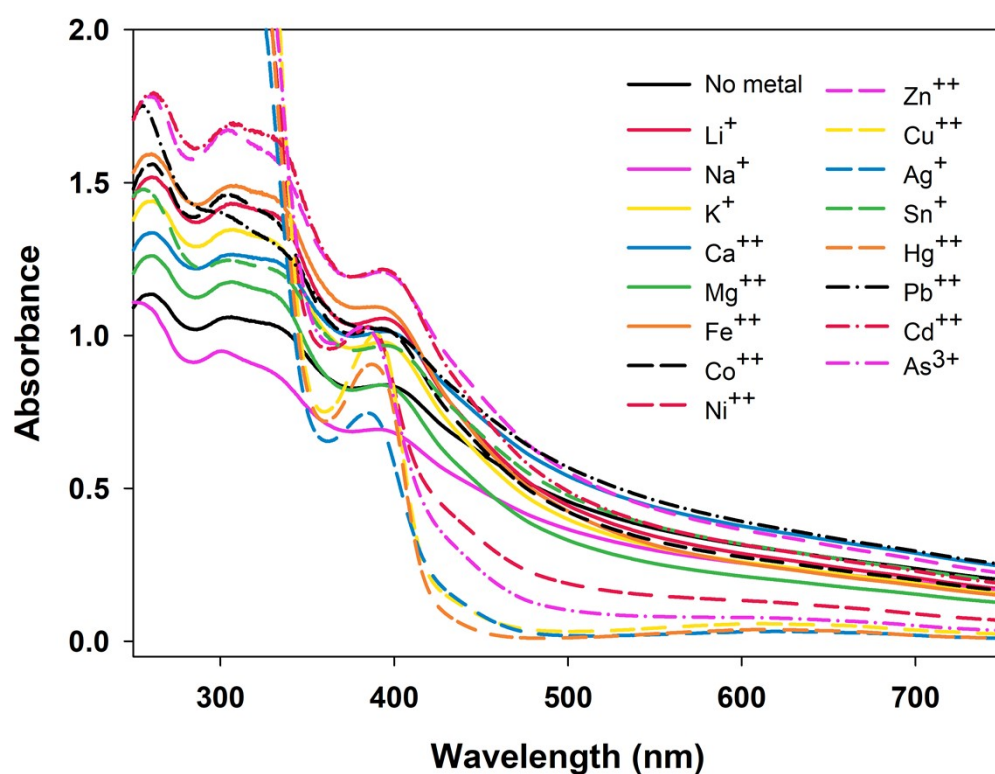

**Figure S2:** *Top.* Selectivity visual test and absorbance spectra for **2** (500  $\mu\text{M}$ ) in the presence of LiCl (1 mM), NaCl (1 mM), KCl (1 mM),  $\text{CaCl}_2$  (1 mM),  $\text{Mg}(\text{NO}_3)_2$  (1 mM),  $\text{FeSO}_4$  (1 mM),  $\text{Co}(\text{NO}_3)_2$  (1 mM),  $\text{Ni}(\text{acac})_2$  (1 mM),  $\text{Zn}(\text{NO}_3)_2$  (1 mM),  $\text{CuCl}_2$  (1 mM),  $\text{AgNO}_3$  (1 mM),  $\text{SnCl}_2$  (1 mM),  $\text{Hg}(\text{NO}_3)_2$  (1 mM),  $\text{Pb}(\text{OAc})_2$  (1 mM),  $\text{Cd}(\text{OAc})_2$  (1 mM) and  $\text{As}(\text{NO}_3)_3$  (1 mM). Photos were taken after 30 min. The data were obtained in HEPES buffer 70 %  $\text{H}_2\text{O}$  : 30 % DMSO,  $\text{pH}=7.3$ . *Bottom.* Absorbance spectra of the same solutions diluted  $\times 10$ .

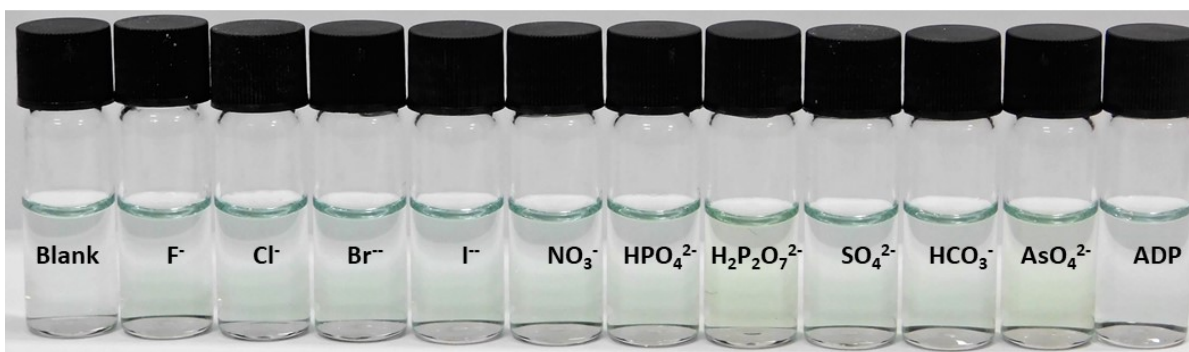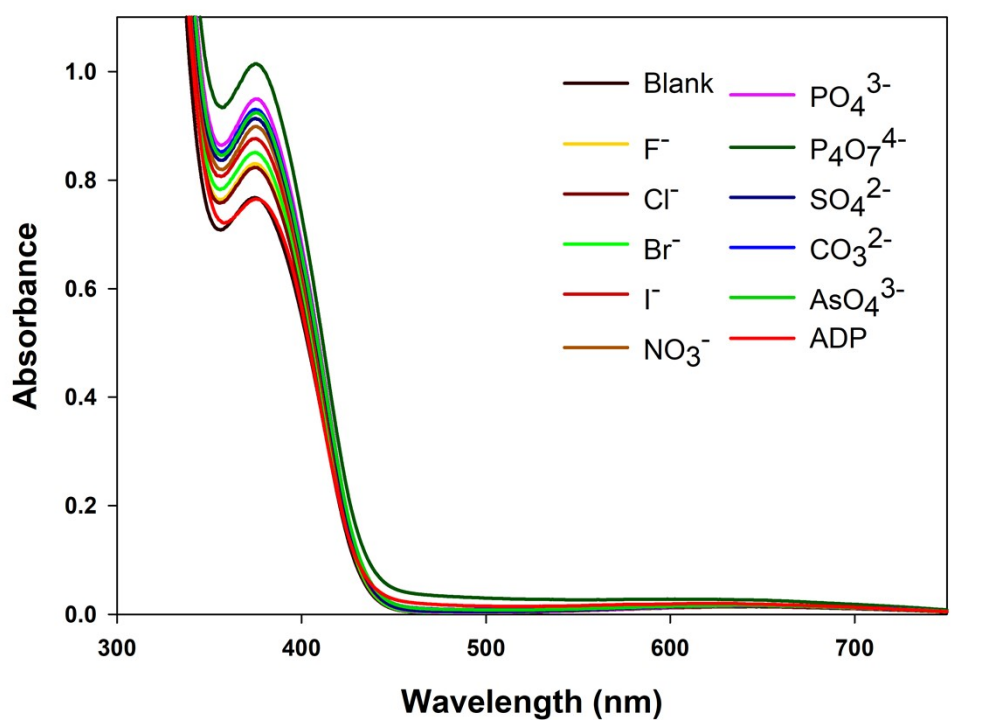

**Figure S3:** *Top* Selectivity visual test for  $1 \cdot 2Zn$  (500  $\mu M$ ) in the presence of NaF (1 mM), NaCl (1 mM), NaBr (1 mM), NaI (1 mM),  $NaNO_3$  (1 mM),  $Na_2HPO_4$  (1 mM),  $Na_4P_2O_7$  (1 mM),  $Na_2SO_4$  (1 mM),  $Na_2CO_3$  (1 mM),  $Na_2HAsO_4$  (1 mM) and Adenosine 5'-diphosphate sodium salt (1 mM). Photos were measured after 30 min. The data were obtained in HEPES buffer 50 %  $H_2O$  : 50 % MeCN, pH=7.3. *Bottom*. Absorbance spectra of the same solutions diluted  $\times 5$ .

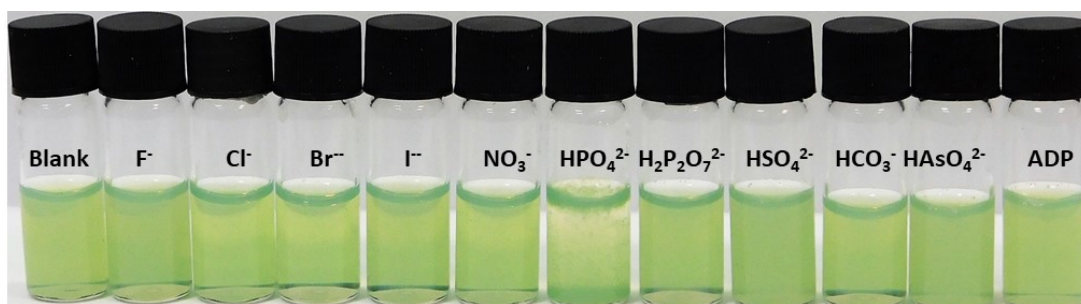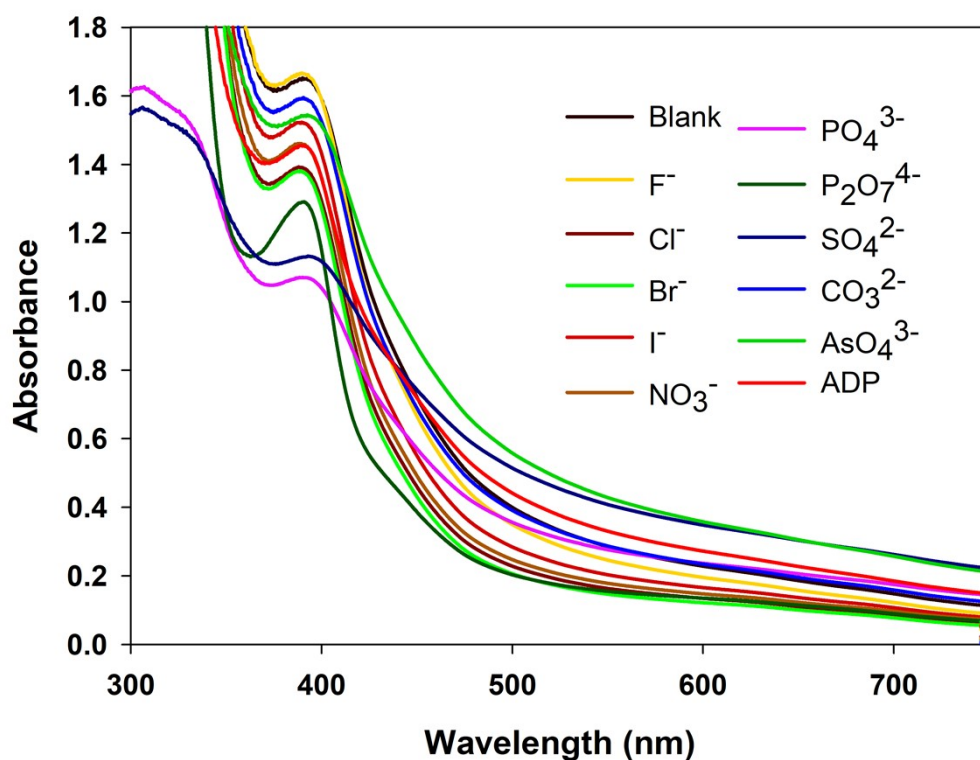

**Figure S4:** *Top* Selectivity visual test for  $2 \cdot 2Zn$  (500  $\mu M$ ) in the presence of NaF (1 mM), NaCl (1 mM), NaBr (1 mM), NaI (1 mM), NaNO<sub>3</sub> (1 mM), Na<sub>2</sub>HPO<sub>4</sub> (1 mM), Na<sub>4</sub>P<sub>2</sub>O<sub>7</sub> (1 mM), Na<sub>2</sub>SO<sub>4</sub> (1 mM), Na<sub>2</sub>CO<sub>3</sub> (1 mM), Na<sub>2</sub>HAsO<sub>4</sub> (1 mM) and Adenosine 5'-diphosphate sodium salt (1 mM). Photos were measured after 30 min. The data were obtained in HEPES buffer 50 % H<sub>2</sub>O : 50 % DMSO, pH=7.3. *Bottom*. Absorbance spectra of the same solutions diluted  $\times 5$ .

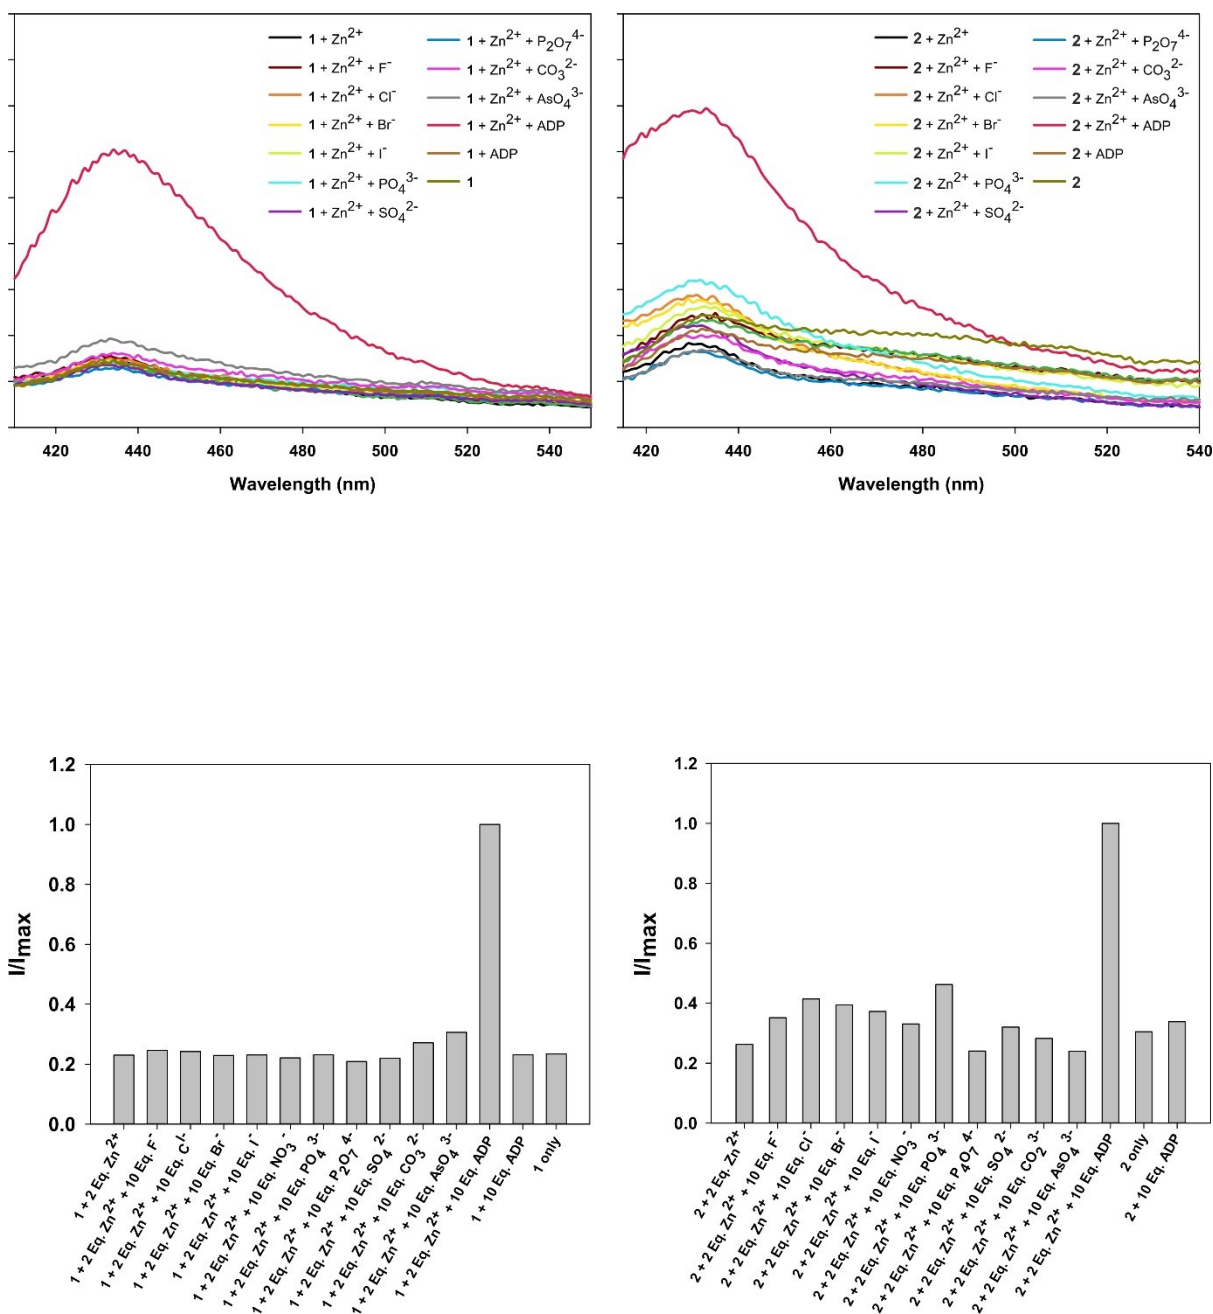

**Figure S5:** Fluorescence emission spectra for **1•2Zn** (*left*) and **2•2Zn** (*right*), each 100  $\mu$ M, in the presence of NaF, NaCl, NaBr, NaI, NaNO<sub>3</sub>, Na<sub>2</sub>HPO<sub>4</sub>, Na<sub>4</sub>P<sub>2</sub>O<sub>7</sub>, Na<sub>2</sub>SO<sub>4</sub>, Na<sub>2</sub>CO<sub>3</sub>, Na<sub>2</sub>HAsO<sub>4</sub> and ADP sodium salt (all 1 mM). Spectra were measured after 30 min. The data were obtained at 25 °C at  $\lambda_{\text{max}} = 435$  nm. Fluorescence intensities were measured with  $\lambda_{\text{exc}} = 380$  (bandwidth 20) nm on a BMG Labtech CLARIOstar plate reader. For **1•2Zn**, solvent was HEPES buffer 50 % H<sub>2</sub>O : 50 % MeCN, pH=7.3; For **2•2Zn**, solvent was HEPES buffer 50 % H<sub>2</sub>O : 50 % DMSO, pH=7.3.

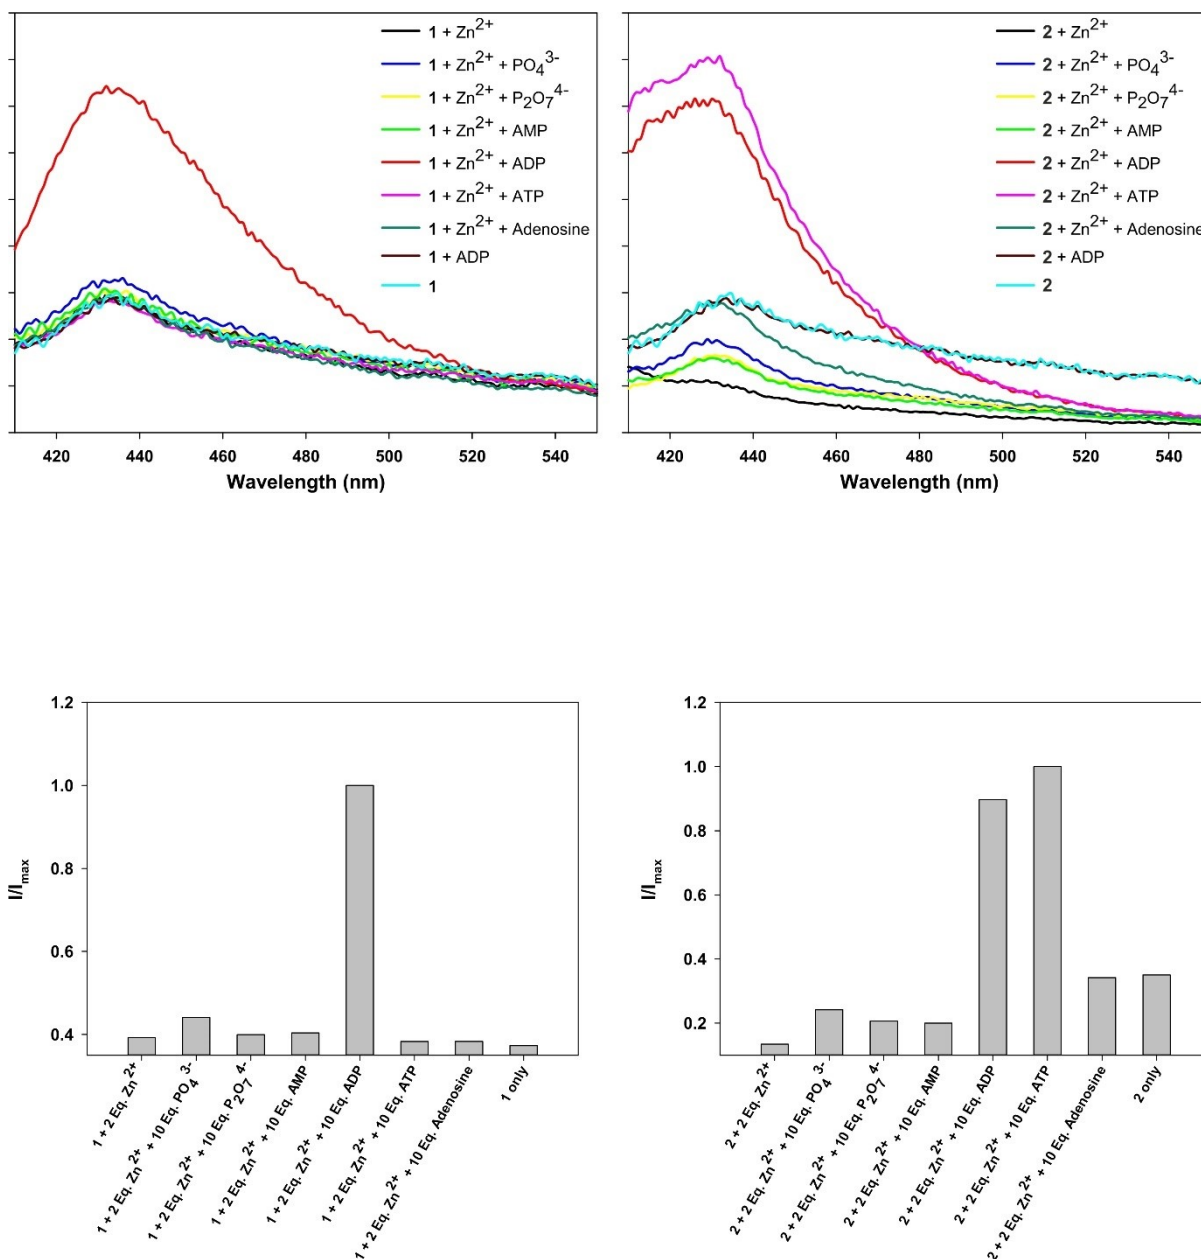

**Figure S6:** Fluorescence emission spectra for **1•2Zn** (*left*) and **2•2Zn** (*right*), each 100  $\mu$ M, in the presence of Na<sub>2</sub>HPO<sub>4</sub>, Na<sub>4</sub>P<sub>2</sub>O<sub>7</sub>, AMP sodium salt, ADP sodium salt, ATP sodium salt and adenosine (all 1 mM). Spectra were measured after 30 min. The data were obtained at 25 °C at  $\lambda_{\text{max}} = 435$  nm.

Fluorescence intensities were measured with  $\lambda_{\text{exc}} = 380$  (bandwidth 20) nm on a BMG Labtech CLARIOstar plate reader. For **1•2Zn**, solvent was HEPES buffer 50 % H<sub>2</sub>O : 50 % MeCN, pH=7.3; For **2•2Zn**, solvent was HEPES buffer 50 % H<sub>2</sub>O : 50 % DMSO, pH=7.3.



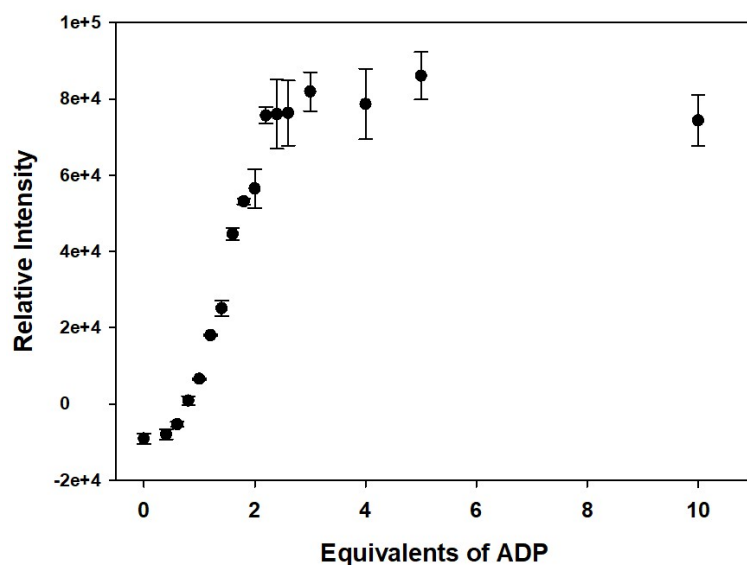

**Figure S7:** Fluorescence dose-response titration for  $1 \cdot 2Zn$ . ( $100 \mu M$ ) in the presence of ADP (0, 40, 60, 80, 100, 120, 140, 160, 180, 200, 220, 240, 260, 300, 400, 500,  $1000 \mu M$ ) after 30 min. The data were obtained in HEPES buffer 50 %  $H_2O$  : 50 % MeCN,  $pH=7.3$  at  $25 \text{ }^\circ C$  at  $\lambda_{max} = 435 \text{ nm}$ . Fluorescence intensities was measured with  $\lambda_{exc} = 380$  (bandwith 20) nm, on a BMG Labtech CLARIOstar plate reader.

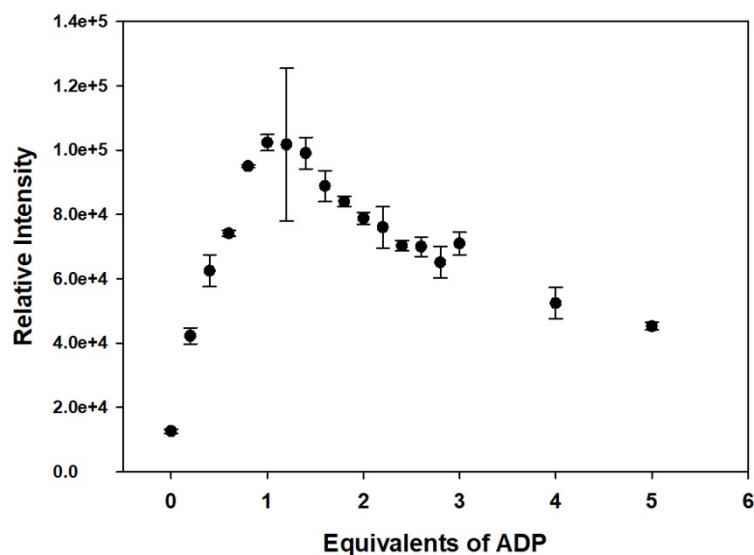

**Figure S8:** Fluorescence dose-response titration for  $2 \cdot 2Zn$ . ( $100 \mu M$ ) in the presence of ADP (0, 40, 60, 80, 100, 120, 140, 160, 180, 200, 220, 240, 260, 300, 400,  $500 \mu M$ ) after 30 min. The data were obtained in HEPES buffer 50 %  $H_2O$  : 50 % DMSO,  $pH=7.3$  at  $25 \text{ }^\circ C$  at  $\lambda_{max} = 435 \text{ nm}$ . Fluorescence intensities was measured with  $\lambda_{exc} = 380$  (bandwith 20) nm, on a BMG Labtech CLARIOstar plate reader.

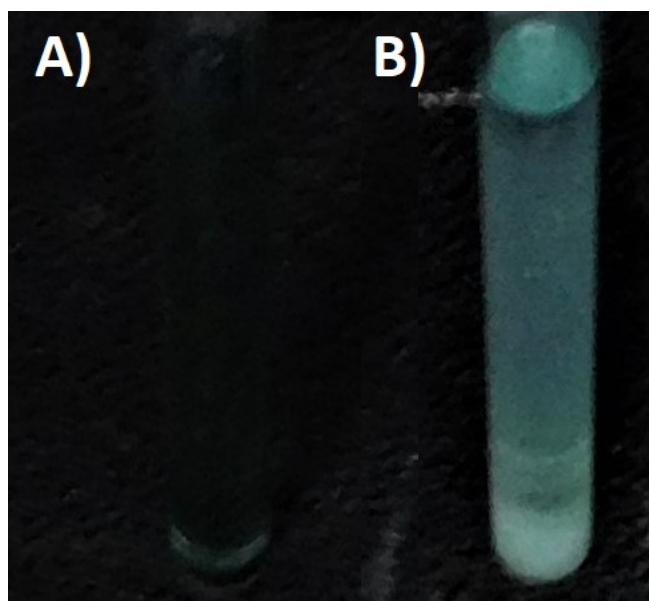

**Figure S9: A)**  $1\bullet 2\text{Zn}$  (2 mM) in HEPES buffer 50 %  $\text{H}_2\text{O}$  : 50 % MeCN, pH=7.3 at 25 °C. **B)**  $1\bullet 2\text{Zn}$  (2 mM) in the presence of ADP (4 mM) in HEPES buffer 50 %  $\text{H}_2\text{O}$  : 50 % MeCN, pH=7.3 at 25 °C. Photo taken under 365 nm UV lamp.

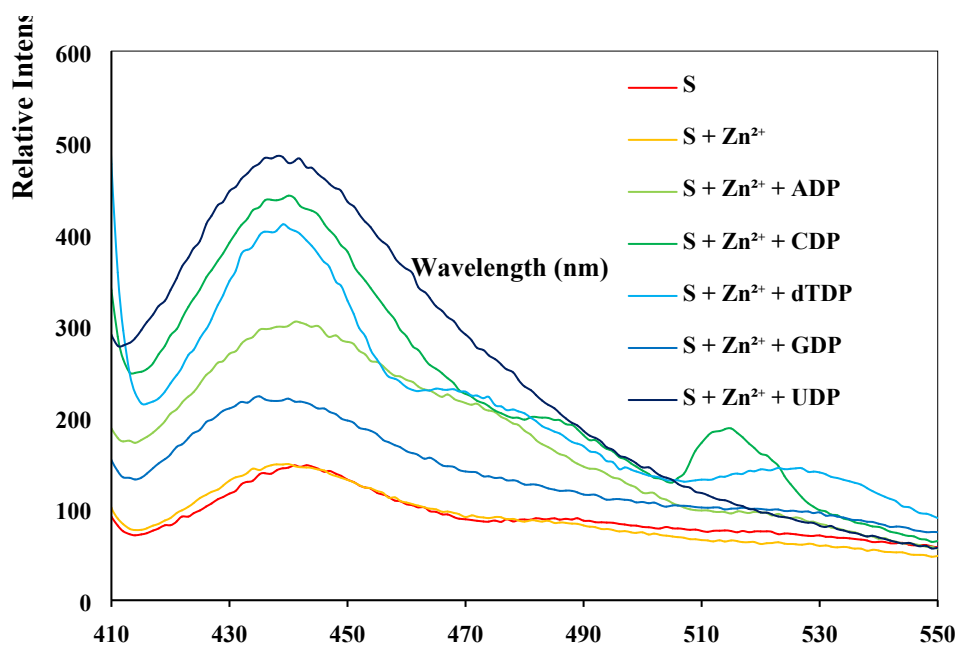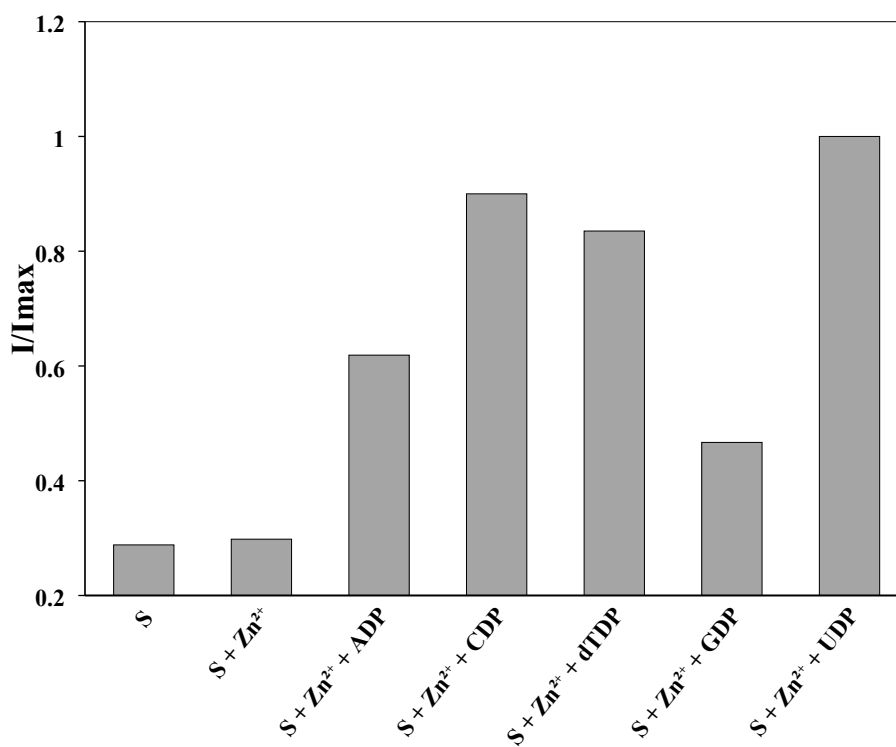

**Figure S10:** (*top*) Fluorescence emission spectra for **1**•2Zn (100  $\mu$ M), in the presence of ADP, CDP, dTDP, GDP and UDP (as their respective sodium salts) (all 1 mM). Spectra were measured after 30 min. The data were obtained at 25  $^{\circ}$ C at  $\lambda_{\text{max}} = 435$  nm in HEPES buffer 50 % H<sub>2</sub>O : 50 % MeCN. Fluorescence intensities were measured with  $\lambda_{\text{exc}} = 380$  (bandwidth 20) nm on an Agilent Technologies Cary Eclipse Fluorescence Spectrometer.

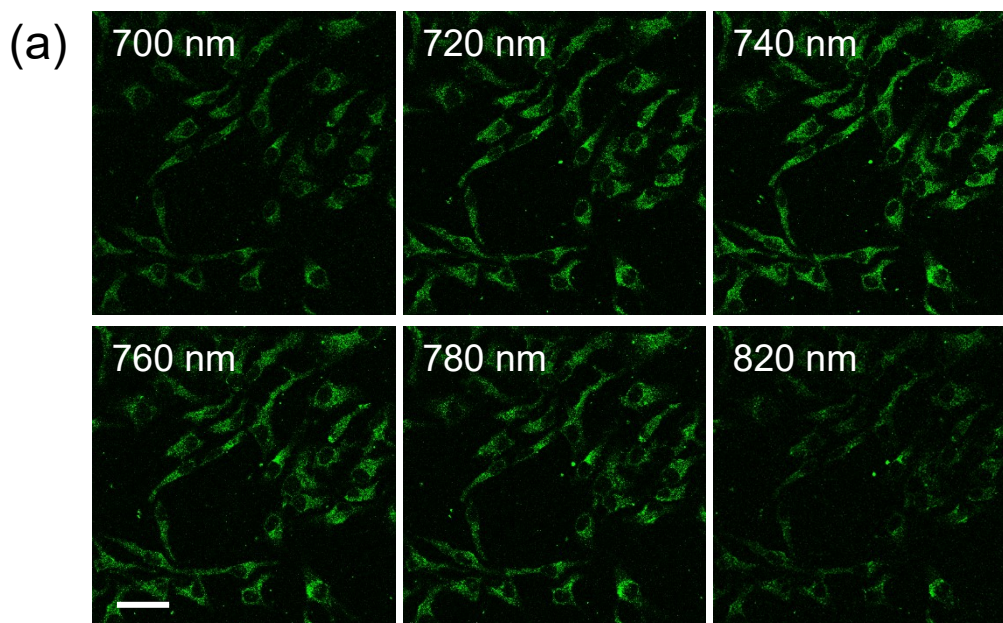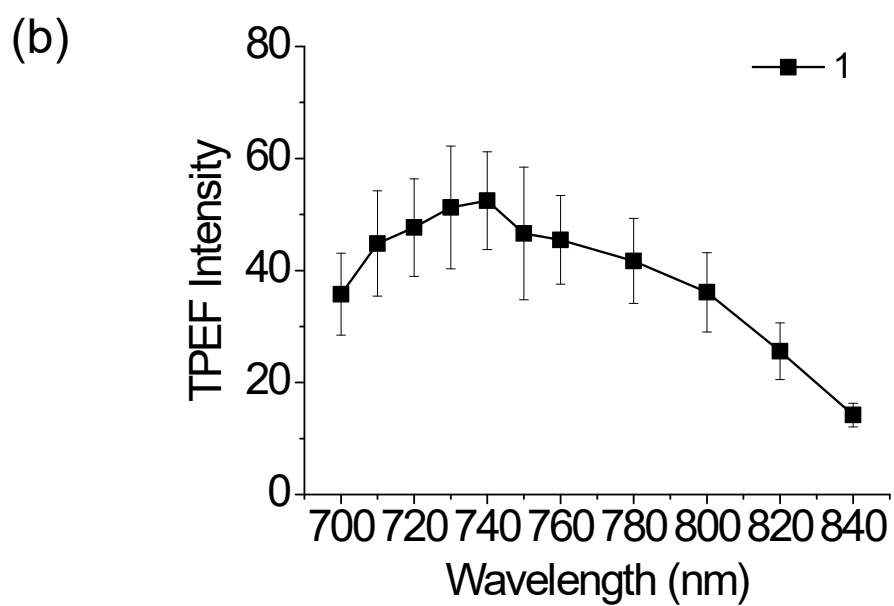

**Figure S11:** (a) TPM images of HeLa cells, which were stained with **1** (10  $\mu$ M) for 30 min, at different excitation wavelengths. (b) Average fluorescence intensity of corresponding TPM images. Images were obtained at 400-700 nm detection windows. Scale bar = 50  $\mu$ m.

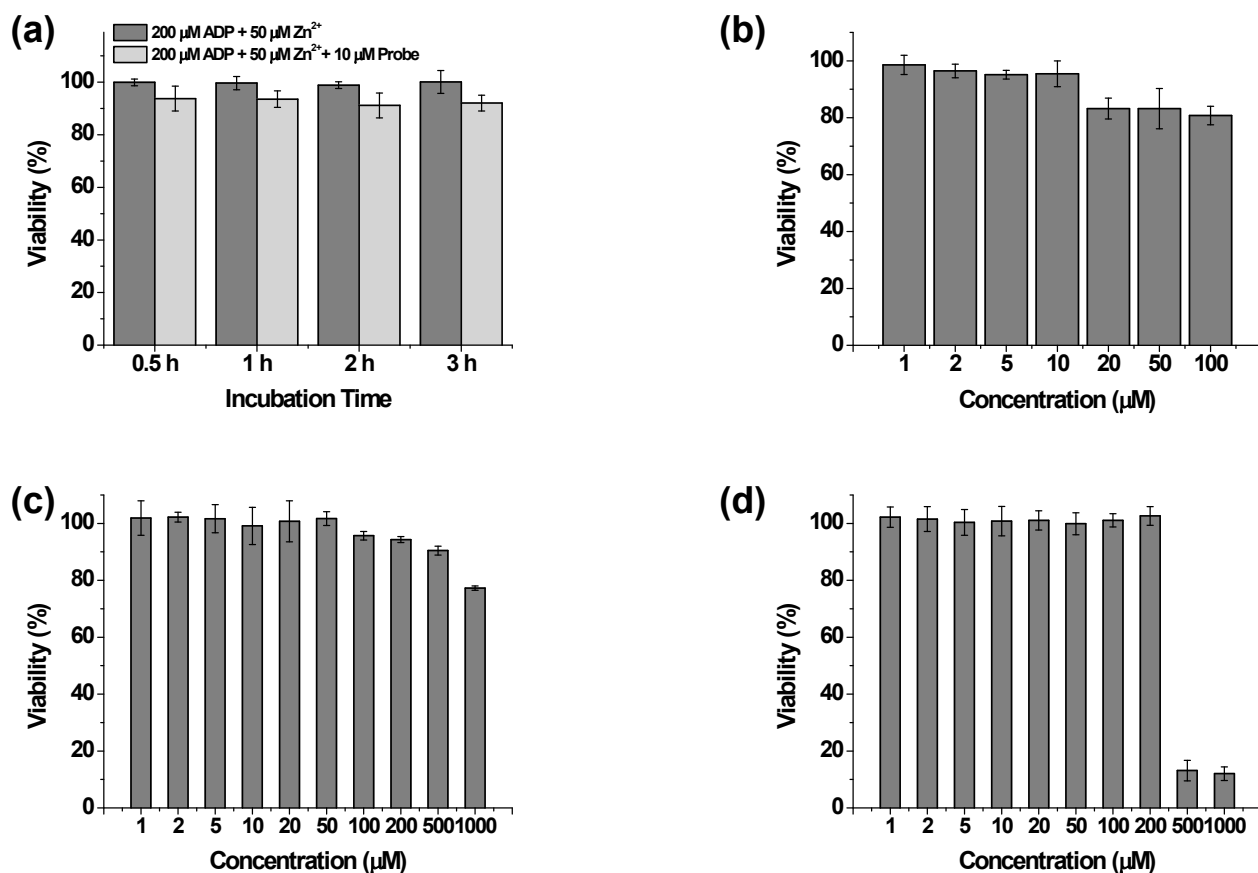

**Figure S12:** The viability of HeLa cells in the presence of ADP, Zn<sup>2+</sup> and probe 1, as measured by using CCK8. (a) The cells were incubated with 200 μM ADP, 50 μM Zn<sup>2+</sup> or with 200 μM ADP, 50 μM Zn<sup>2+</sup> and 10 μM probe 1. The cells were incubated with various concentration of (b) probe 1, (c) ADP and (d) Zn<sup>2+</sup> for 24 h. For calculation of viability, the absorbance of CCK8 was measured at 450 nm.

#### 4-Iodo-*N*-2-picolylaniline (**3**) and 4-Iodo-*N,N*-bis(2-picolyl)aniline (**4**)

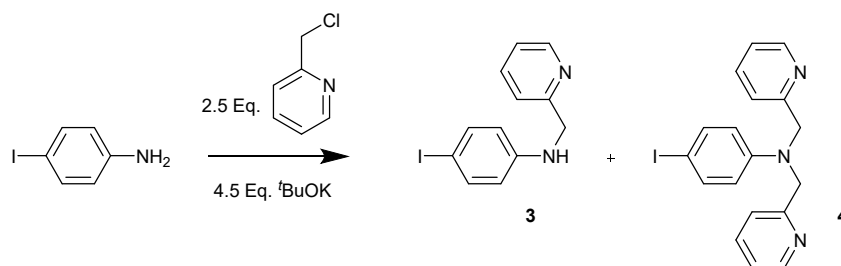

8.00 g of 2-chloromethylpyridine hydrochloride (48.8 mmol, 2.5 eq.) and 4.24 g of 4-iodoaniline (19.4 mmol, 1 Eq.) were poured into a 250 mL round bottom flask containing 80 mL of water. 10.1 grams of potassium *tert*-butoxide (89.2 mmol, 4.6 Eq.) were dissolved in 80 mL of water. This solution was slowly added to the round bottom flask and a colour change from brown to red was observed. The reaction was stirred at room temperature for 4 days. After this, the product was extracted using CH<sub>2</sub>Cl<sub>2</sub> (3 × 50 mL), the organic phase was dried with MgSO<sub>4</sub> and filtered. Then, the filtrate was concentrated under reduced pressure and the residue was purified by silica column chromatography (CH<sub>2</sub>Cl<sub>2</sub>/Acetone 3:7 to 1:1) to give **3** as a yellow solid (2.64 g, 8.5 mmol, 44%, R<sub>f</sub> = 0.66), followed by **4** as an orange solid (1.77 g, 4.4 mmol, 23%, R<sub>f</sub> = 0.50).

**3**: <sup>1</sup>H-NMR (300 MHz, Chloroform-*d*) δ 8.58 (d, *J* = 4.9 Hz, 1H), 7.65 (app td, *J* = 7.7, 1.8 Hz, 1H), 7.42 (d, *J* = 8.8 Hz, 2H), 7.29 (d, *J* = 7.9 Hz, 1H), 7.19 (dd, *J* = 7.3, 5.0 Hz, 1H), 6.45 (d, *J* = 8.8 Hz, 2H), 4.90 (br s, 1H), 4.41 (d, *J* = 4.4 Hz, 2H) ppm. Data in agreement with literature.<sup>1,2</sup>

**4**: <sup>1</sup>H-NMR (300 MHz, Chloroform-*d*) δ 8.58 (d, *J* = 4.9 Hz, 2H), 7.62 (app td, *J* = 7.7, 1.8 Hz, 2H), 7.38 (d, *J* = 8.9 Hz, 2H), 7.22-7.15 (m, 4H), 6.47 (d, *J* = 8.9 Hz, 2H), 4.79 (s, 4H) ppm. Data in agreement with literature.<sup>3,4</sup>

*N,N*-bis(2-Picolyl)-4-(4,4,5,5-tetramethyl-1,3,2-dioxaborolan-2-yl)aniline (**5**)

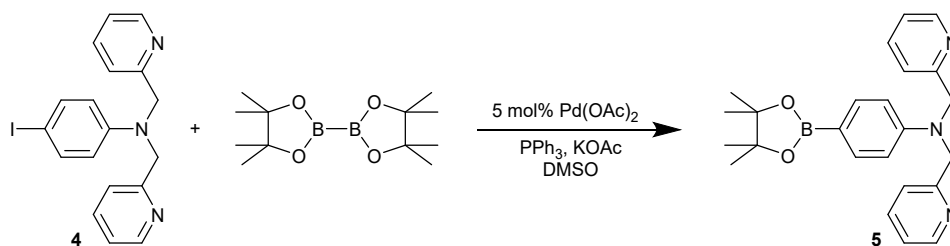

1.17 g of **4** (2.76 mmol, 1 Eq.), 31 mg of palladium acetate (0.14 mmol, 0.05 Eq.), 72.4 mg of triphenylphosphine (0.28 mmol, 0.1 Eq.), 745 mg of bis(pinacolato)diboron (3.31 mmol, 1.2 Eq.) and 815 mg of potassium acetate (8.28 mmol, 3 Eq.) were added into a round bottom flask, which was then evacuated and filled with nitrogen. The flask was filled with 20 mL of dry DMSO and the reaction was stirred at 80 °C for 18 h. After this, the reaction mixture was poured into 250 mL of water and the product was extracted using CH<sub>2</sub>Cl<sub>2</sub> (3 × 750mL), the organic phase was washed with 50 mL of 5 % LiCl<sub>(aq)</sub>, dried over MgSO<sub>4</sub> and filtered. Then, the filtrate was concentrated under reduced pressure and the residue was purified by silica column chromatography (CH<sub>2</sub>Cl<sub>2</sub>/MeOH 25:1) to give 821 mg of **5** (2.04 mmol, 74 %, R<sub>f</sub> = 0.72) as a pale yellow solid.

<sup>1</sup>H-NMR (300 MHz, Chloroform-*d*) δ 8.58 (ddd, *J* = 4.8, 1.8, 0.9 Hz, 2H), 7.64-7.57 (m, 4H), 7.28-7.13 (m, 4H), 6.69 (d, *J* = 8.8 Hz, 2H), 4.85 (s, 4H), 1.28 (s, 12H) ppm. Data in agreement with literature.<sup>5,6</sup>

4,4'-(Azulene-1,3-diyl)bis(*N,N*-bis(2-picolyl)aniline) (**1**)

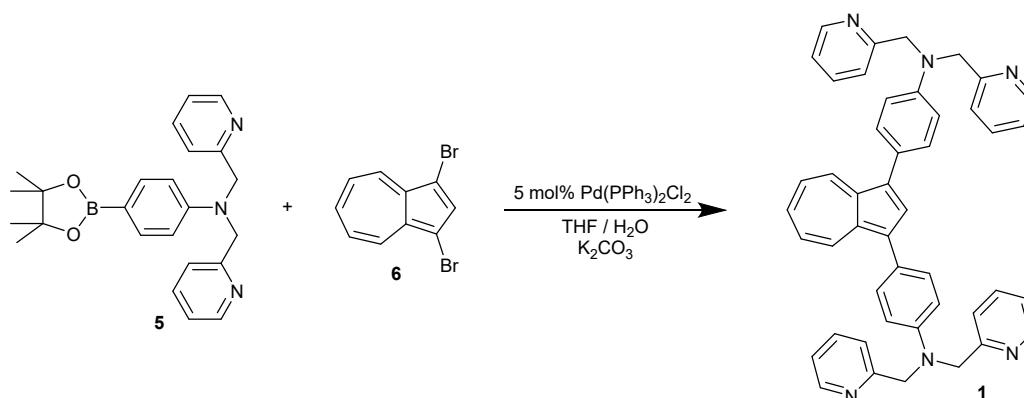

81 mg of 1,3-dibromoazulene<sup>7</sup> (**6**, 0.28 mmol, 1 Eq.), 454 mg of **5** (1.13 mmol, 4 Eq.), 10 mg of Pd(PPh<sub>3</sub>)Cl<sub>2</sub> (0.014, 0.05 Eq.) and 156 mg of potassium carbonate (1.13 mmol, 4 Eq.) were added to a 50 mL round bottom flask, this was evacuated and filled with nitrogen, then filled with 20 mL of a THF/water (4:1) mixture that had been previously degassed by freeze-pump-thaw. The mixture was allowed to react for 18 hours at 75 °C. The product was extracted using CH<sub>2</sub>Cl<sub>2</sub> (3 × 50 mL), the organic phase was dried over MgSO<sub>4</sub> and filtered. The filtrate was concentrated under reduced pressure and the residue was purified by silica column chromatography (CH<sub>2</sub>Cl<sub>2</sub>/MeOH 25:1), followed by recrystallisation from acetonitrile to give 121 mg of **1** (0.17 mmol, 63%, R<sub>f</sub> = 0.50) as a green solid (blue in CH<sub>2</sub>Cl<sub>2</sub> solution).

**1**: <sup>1</sup>H-NMR (500 MHz, DMSO-*d*<sub>6</sub>) δ 8.58 (d, *J* = 4.9 Hz, 4H), 8.28 (d, *J* = 9.7 Hz, 2H), 7.91 (s, 1H), 7.76 (app td, *J* = 7.7, 1.9 Hz, 4H), 7.49 (t, *J* = 9.8 Hz, 1H), 7.37 (d, *J* = 7.9 Hz, 4H), 7.34 (d, *J* = 8.4 Hz, 4H), 7.28 (dd, *J* = 7.5, 4.9 Hz, 4H), 6.98 (app t, *J* = 9.8 Hz, 2H), 6.77 (d, *J* = 8.5 Hz, 4H), 4.90 (s, 8H) ppm. <sup>13</sup>C-NMR (126 MHz, acetone-*d*<sub>6</sub>) δ 160.30, 150.43, 148.08, 139.63, 137.42, 137.05, 136.71, 136.57, 131.45, 131.12, 126.47, 123.16, 122.87, 121.96, 113.73, 58.33 ppm. IR ν: 3051, 3006, 2926, 2858, 1737, 1610, 1589, 1567, 1531, 1500, 1470, 1433, 1380, 1346, 1296, 1271, 1231, 1199, 1178, 1119, 1093, 1044, 1011, 993, 967, 947, 888, 862, 815, 753, 738, 722, 694, 670, 657 cm<sup>-1</sup>. Melting point = 94 ± 2 °C. HRMS (ESI+) calcd for [C<sub>46</sub>H<sub>38</sub>N<sub>6</sub>+H]<sup>+</sup> 675.3231; found 675.3205. Calcd for [C<sub>46</sub>H<sub>38</sub>N<sub>6</sub>+Na]<sup>+</sup> 697.3050; found 697.3029.



### 3-Iodo-*N,N*-bis(2-picolyl)aniline (**7**)

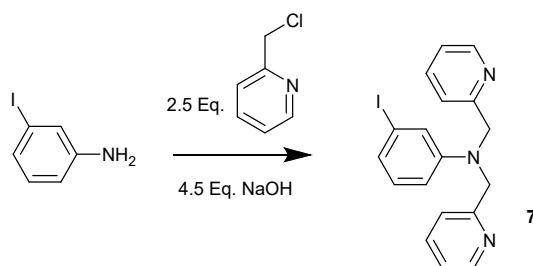

9.25 g of 2-chloromethylpyridine hydrochloride (56.4 mmol, 2.5 Eq.) and 2.71 mL of 3-iodoaniline (22.6 mmol, 1.0 Eq.) were poured in a 250 mL round bottom flask containing 80 mL of water. 4.06 g of sodium hydroxide (101.5 mmol, 4.5 Eq.) were dissolved in 80 mL of water, then this solution was slowly added to the round bottom flask and a colour change from brown to red was observed. The reaction was stirred at room temperature for 4 days. After this, the product was extracted using  $\text{CH}_2\text{Cl}_2$  (3  $\times$  50 mL), the organic phase was dried over  $\text{MgSO}_4$  and filtered. Then, the filtrate was concentrated under reduced pressure and the residue was purified by silica column chromatography ( $\text{CH}_2\text{Cl}_2$ /Acetone 3:7 to 1:1) to give 1.00 g of **7** (2.5 mmol, 11%,  $R_f = 0.50$ ) as an orange oil.

$^1\text{H-NMR}$  (500 MHz, Chloroform-*d*)  $\delta$  8.59 (ddd,  $J = 4.9, 1.8, 0.9$  Hz, 2H), 7.63 (app td,  $J = 7.7, 1.8$  Hz, 2H), 7.22 (d,  $J = 7.9$  Hz, 2H), 7.17 (ddd,  $J = 7.6, 4.8, 1.1$  Hz, 2H), 7.07 (dd,  $J = 2.6, 1.5$  Hz, 1H), 7.03 (d,  $J = 7.7$  Hz, 1H), 6.84 (dd,  $J = 8.5, 7.7$  Hz, 1H), 6.64 (ddd,  $J = 8.5, 2.7, 0.9$  Hz, 1H), 4.77 (s, 4H) ppm.  $^{13}\text{C-NMR}$  (126 MHz, Chloroform-*d*)  $\delta$  158.19, 149.95, 149.64, 137.00, 130.76, 126.37, 122.32, 121.32, 120.87, 111.97, 95.71, 57.15 ppm. IR  $\nu$ : 2988, 2971, 2901, 1583, 1510, 1488, 1470, 1430, 1381, 1341, 1277, 1253, 1224, 1174, 1088, 1043, 978, 964, 941, 794, 751, 731, 682  $\text{cm}^{-1}$ . HRMS (ESI+) calcd for  $[\text{C}_{18}\text{H}_{16}\text{IN}_3+\text{H}]^+$  402.0462; found 402.0474.

*N,N*-Bis(2-picolyl)-3-(4,4,5,5-tetramethyl-1,3,2-dioxaborolan-2-yl) aniline (**8**)

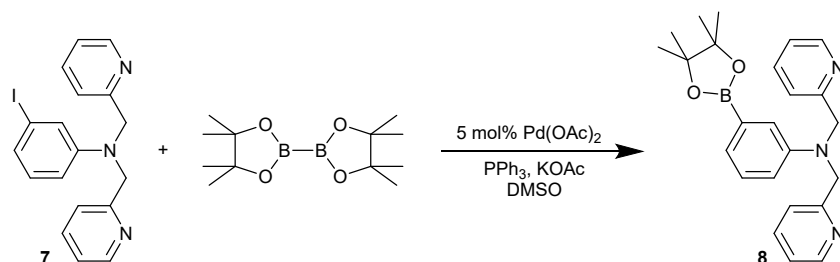

1.00 g of **7** (2.5 mmol, 1 Eq.), 28 mg of palladium acetate (0.12 mmol, 0.05 Eq.), 65.3 mg of triphenylphosphine (0.25 mmol, 0.1 Eq.), 762 mg of bis(pinacolato)diboron (3 mmol, 1.2 Eq.) and 733 mg of potassium acetate (7.47 mmol, 3 Eq.) were added to a round bottom flask. This was evacuated and filled with nitrogen. The flask was filled with 20 mL of dry DMSO and the reaction was stirred at 80 °C for 18 hours. After this, the reaction mixture was poured into 150 mL of water and the product was extracted using CH<sub>2</sub>Cl<sub>2</sub> (3 × 50 mL). The organic phase was washed with 50 mL of 5% LiCl<sub>(aq)</sub>, dried over MgSO<sub>4</sub> and filtered. Then, the filtrate was concentrated under reduced pressure and the residue was purified by silica column chromatography (CH<sub>2</sub>Cl<sub>2</sub>/MeOH 25:1) to give 768 mg of **8** (1.92 mmol, 77%, R<sub>f</sub> = 0.65) as an orange oil.

<sup>1</sup>H-NMR (500 MHz, Chloroform-*d*) δ 8.57 (ddd, *J* = 4.9, 1.8, 0.9 Hz, 2H), 7.59 (app td, *J* = 7.7, 1.8 Hz, 2H), 7.27-7.23 (m, 3H), 7.19-7.12 (m, 4H), 6.78 (app dt, *J* = 7.3, 2.6 Hz, 1H), 4.82 (s, 4H), 1.28 (s, 12H) ppm. <sup>13</sup>C-NMR (126 MHz, Chloroform-*d*) δ 159.01, 149.72, 147.85, 136.86, 128.87, 123.92, 122.07, 121.08, 118.51, 115.69, 83.73, 56.90, 24.93 ppm. One carbon environment was not observed (C adjacent to B). IR ν: 3082, 2976, 2925, 2854, 1605, 1548, 1529, 1507, 1469, 1434, 1390, 1352, 1277, 1231, 1200, 1140, 1098, 1046, 1008, 991, 963, 942, 907, 887, 860, 810, 769, 750, 695, 670, 652 cm<sup>-1</sup>. HRMS (ESI+) calcd for [C<sub>24</sub>H<sub>28</sub>BN<sub>3</sub>O<sub>2</sub>+H]<sup>+</sup> 402.2347; found 402.2351.

### 3,3'-(Azulene-1,3-diyl)bis(*N,N*-bis(2-picolyl)aniline) (**2**)

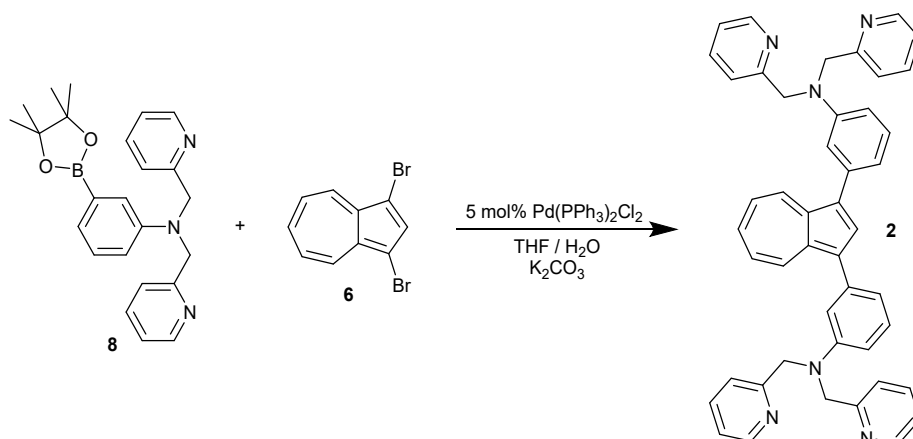

138 mg of 1,3-dibromoazulene<sup>7</sup> (**6**, 0.47 mmol, 1 Eq.), 750 mg of **8** (1.87 mmol, 4 Eq.), 16 mg of Pd(PPh<sub>3</sub>)Cl<sub>2</sub> (0.02 mmol, 0.05 Eq.) and 259 mg of potassium carbonate (1.87 mmol, 4 Eq.) were added to a 50 mL round bottom flask, this was evacuated and filled with nitrogen, then filled with 20 mL of a THF/water (4:1) mixture that had been previously degassed by freeze-pump-thaw. The mixture was allowed to react for 18 hours at 75 °C. The product was extracted using CH<sub>2</sub>Cl<sub>2</sub> (3 × 50 mL), the organic phase was dried over MgSO<sub>4</sub> and filtered. Then, the filtrate was concentrated under reduced pressure and the residue was purified by silica column chromatography (CH<sub>2</sub>Cl<sub>2</sub>/MeOH 25:1), followed by recrystallisation from acetonitrile to give 276 mg of **2** (0.41 mmol, 87%, R<sub>f</sub> = 0.50) as a green solid (blue in CH<sub>2</sub>Cl<sub>2</sub> solution).

<sup>1</sup>H-NMR (500 MHz, Acetone-*d*<sub>6</sub>) δ 8.57 (s, 4H), 8.19 (d, *J* = 7.1 Hz, 2H), 7.88 (s, 1H), 7.76 (app t, *J* = 7.6 Hz, 4H), 7.53 (t, *J* = 9.8 Hz, 1H), 7.44 (d, *J* = 7.9 Hz, 4H), 7.30-7.21 (m, 6H), 6.98-6.85 (m, 6H), 6.74 (d, *J* = 7.9 Hz, 2H), 4.96 (s, 8H) ppm. <sup>13</sup>C-NMR (126 MHz, Methanol-*d*<sub>4</sub>) δ 160.43, 150.21, 149.11, 139.69, 139.18, 138.96, 137.83, 137.61, 136.72, 132.01, 130.61, 124.34, 123.75, 122.93, 120.11, 115.53, 112.31, 58.43 ppm. IR ν: 3048, 3005, 2958, 2925.5, 2872, 2160, 1979, 1728, 1589, 1569, 1491, 1470, 1433, 1383, 1342, 1274, 1249, 1226, 1194, 1176, 1146, 1091, 1047, 993, 968, 946, 856, 776, 753, 703, 654 cm<sup>-1</sup>. Melting point = 90±4 °C. HRMS (ESI+) calcd for [C<sub>46</sub>H<sub>38</sub>N<sub>6</sub>+H]<sup>+</sup> 675.3231; found 675.3377.

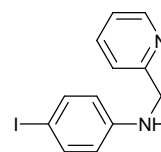

3, 300 MHz, CDCl<sub>3</sub>

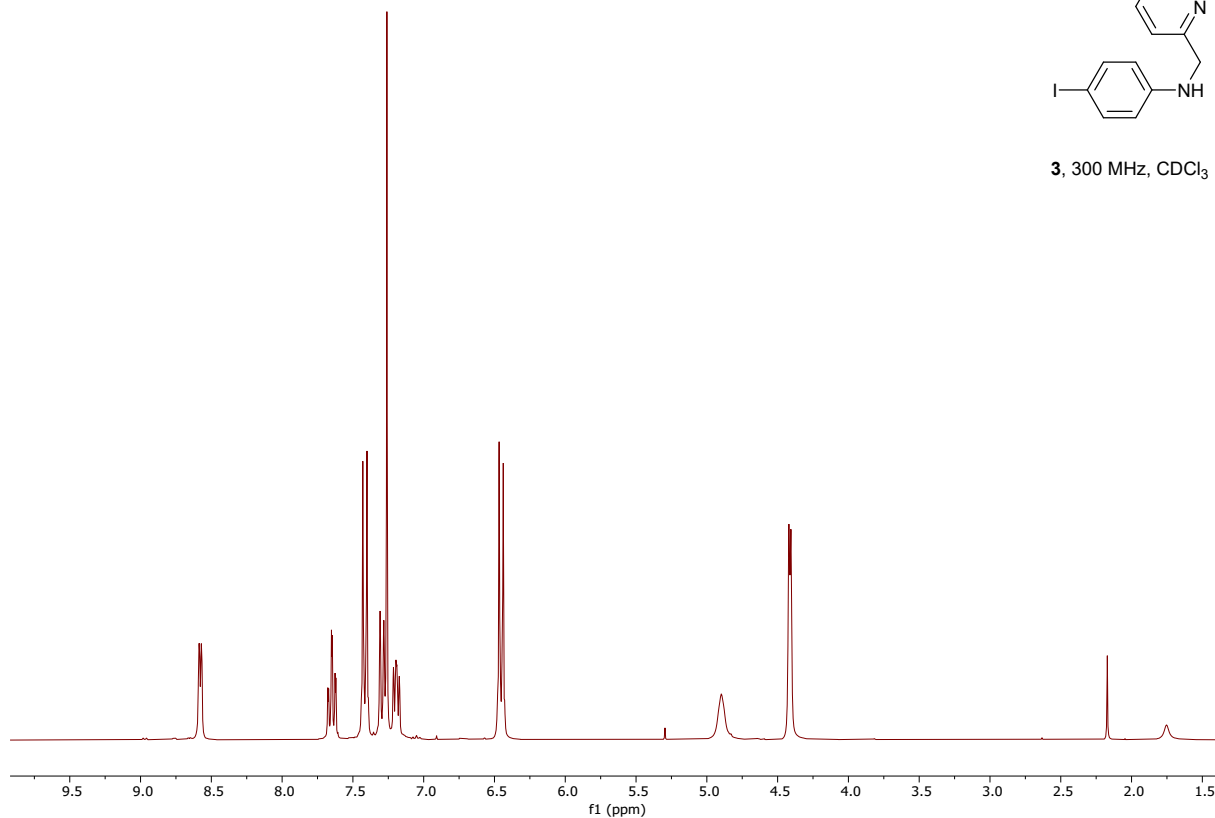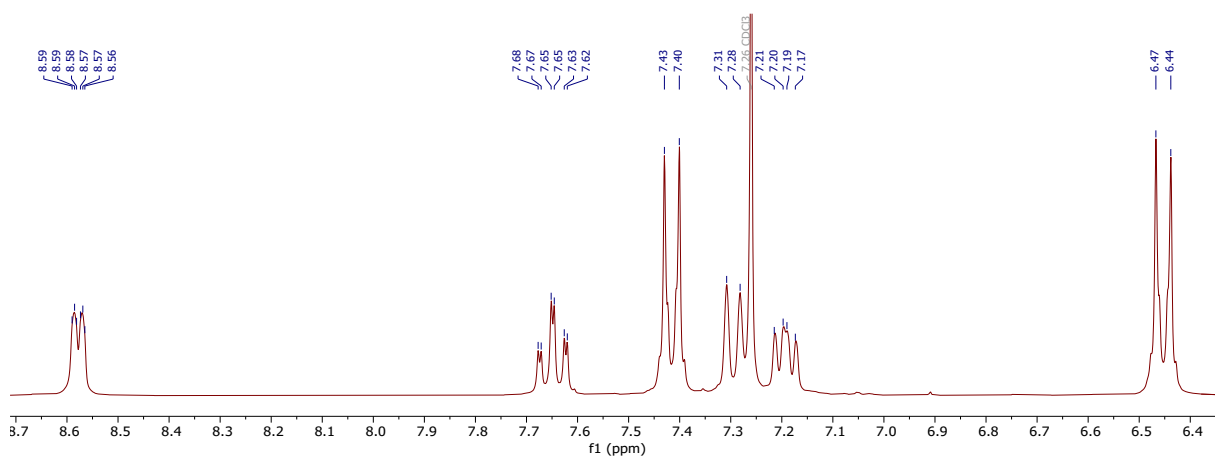

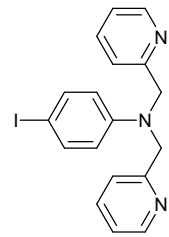

4, 300 MHz, CDCl<sub>3</sub>

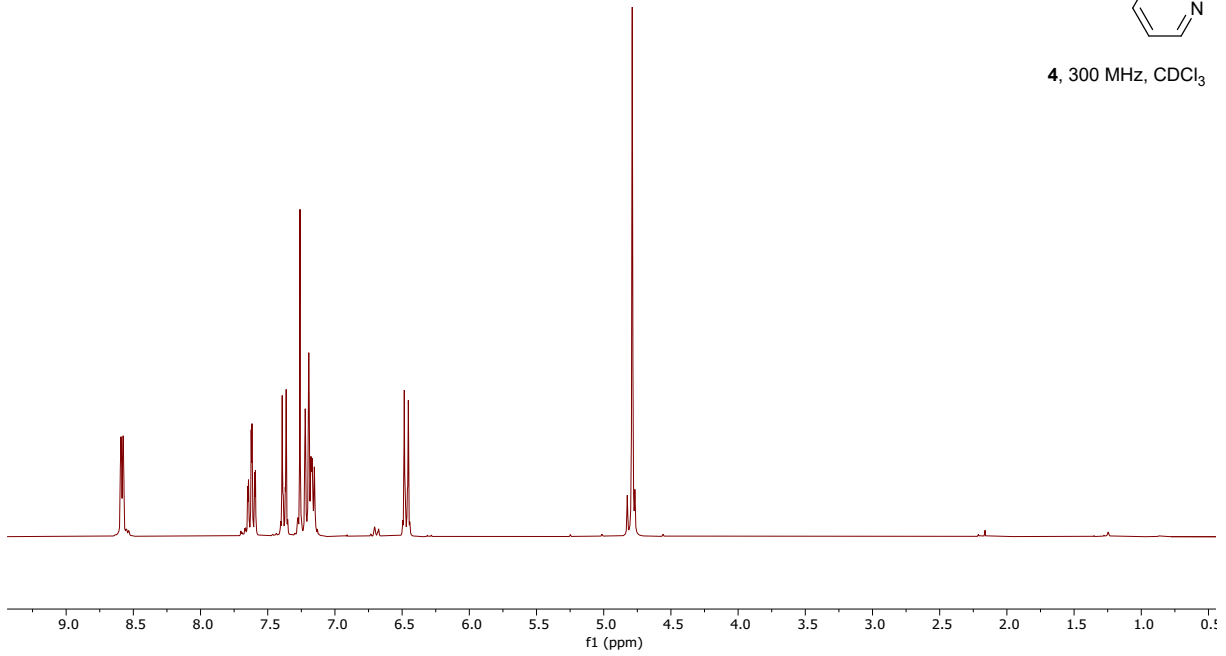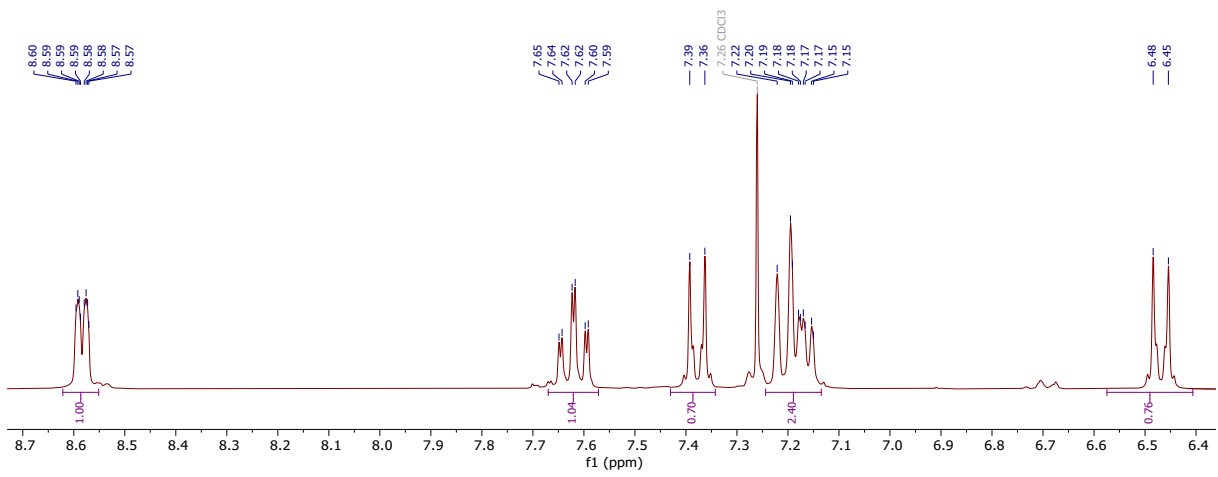

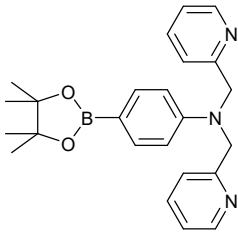

5, 300 MHz, CDCl<sub>3</sub>

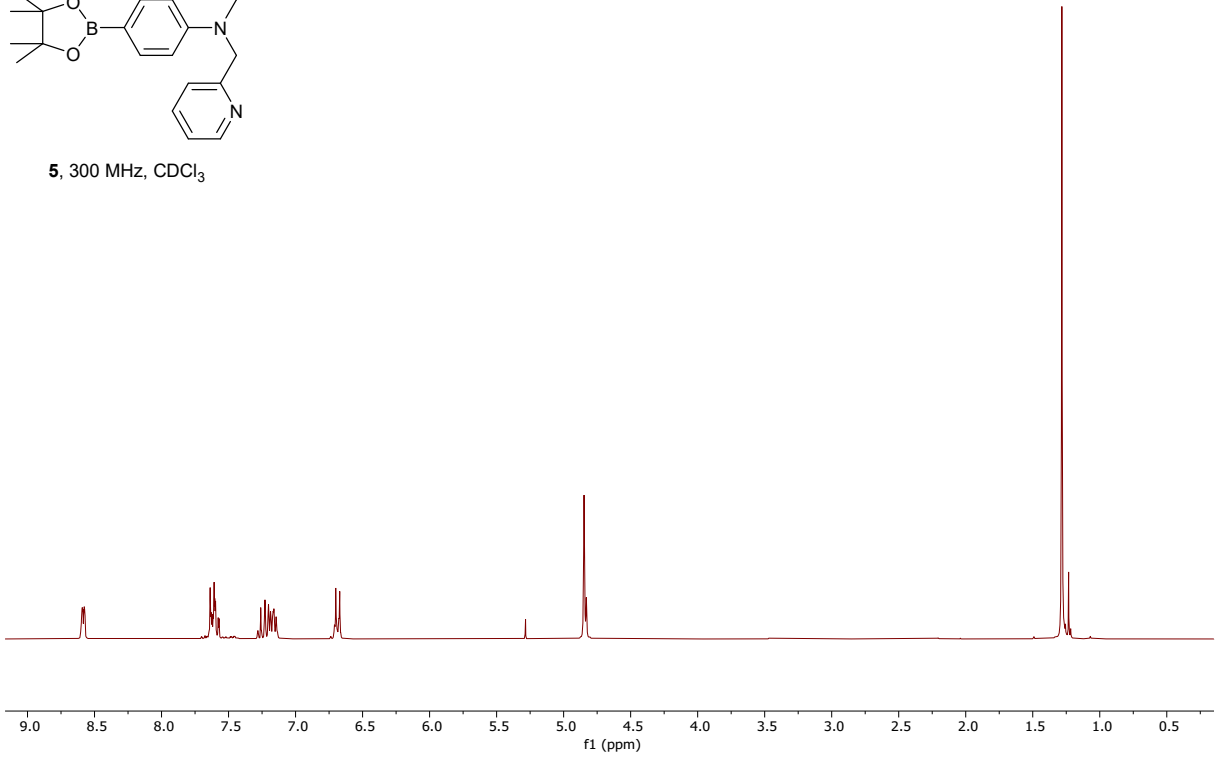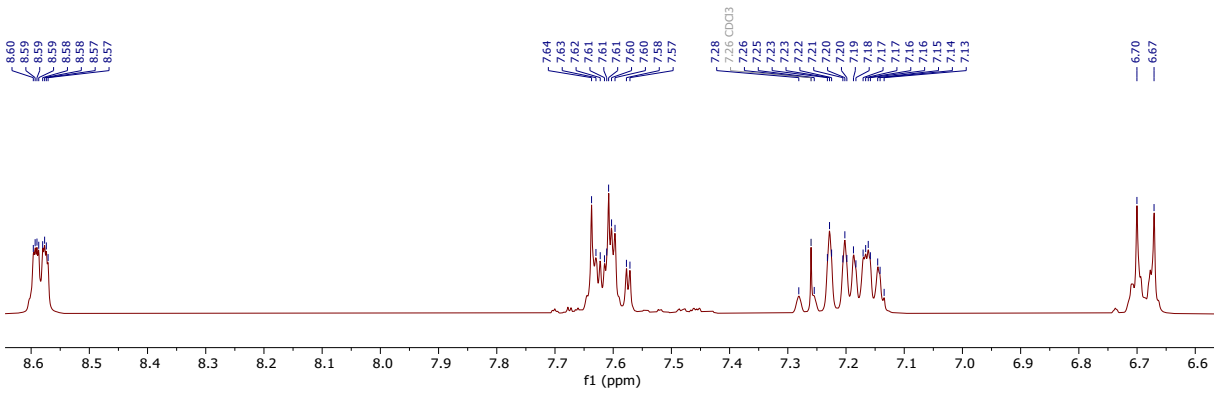

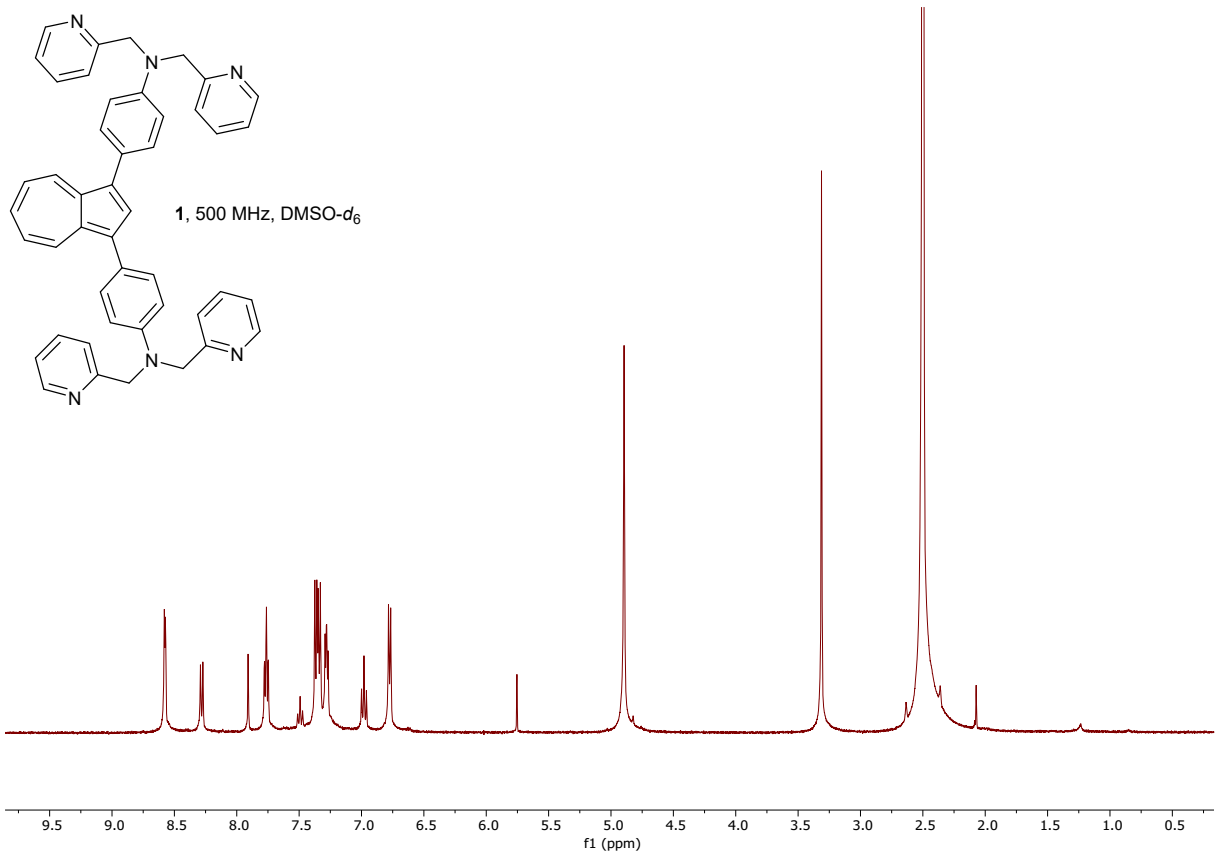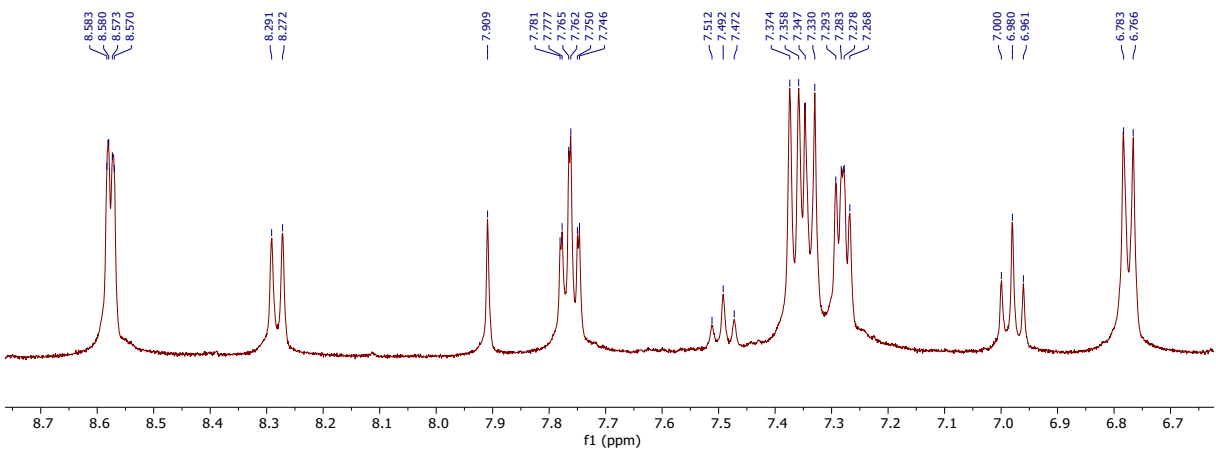

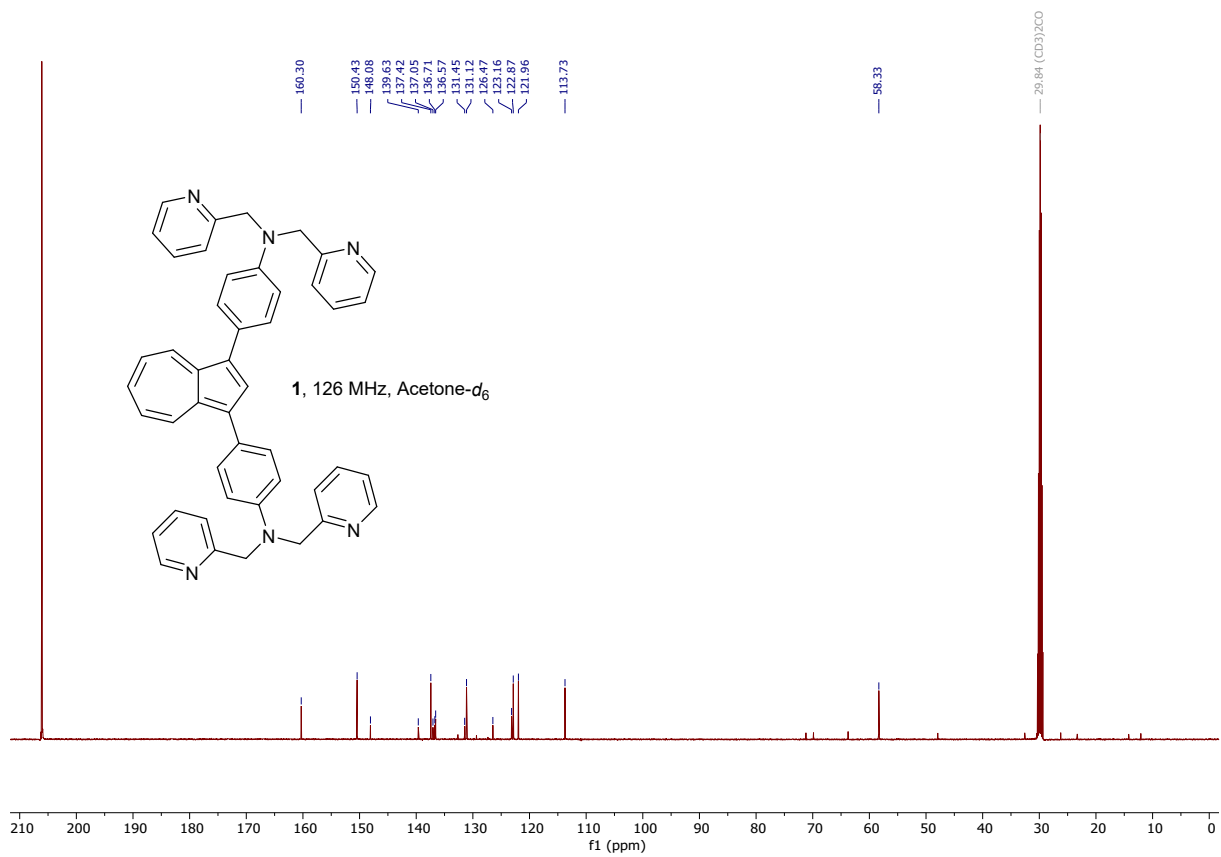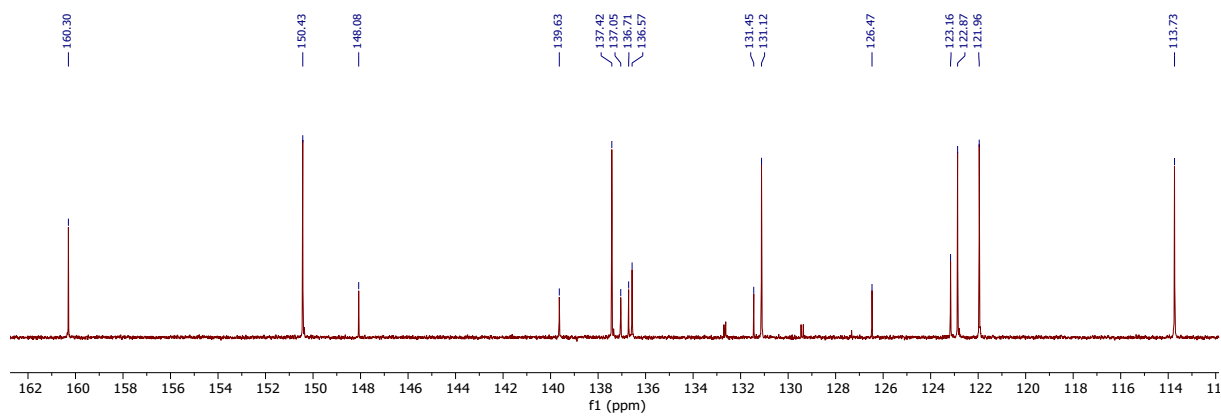



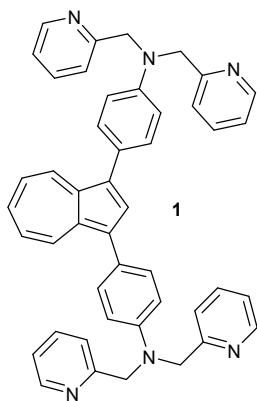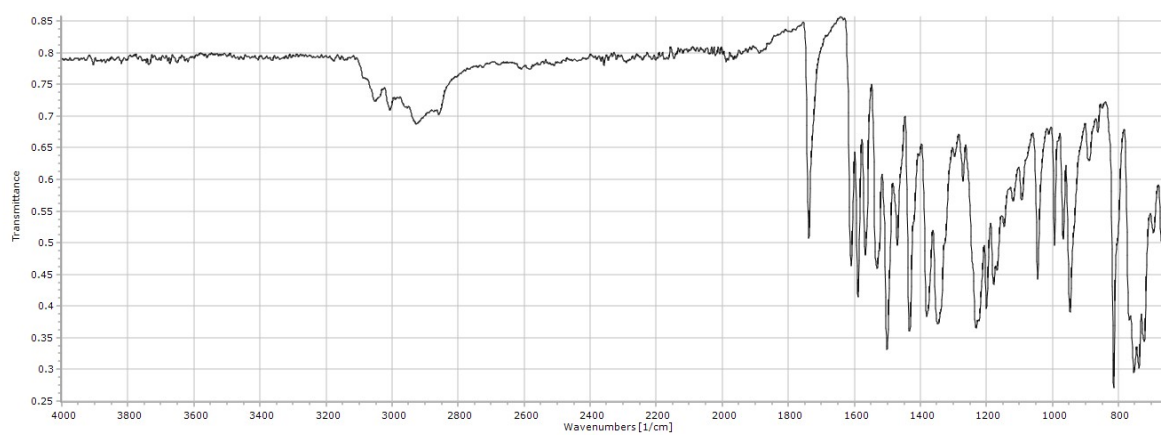

**Spectrum Source** Peak (1) in "+ BPC(all [-4]) Scan" **Fragmentor Voltage** 125 **Collision Energy** 0 **Ionization Mode** ESI

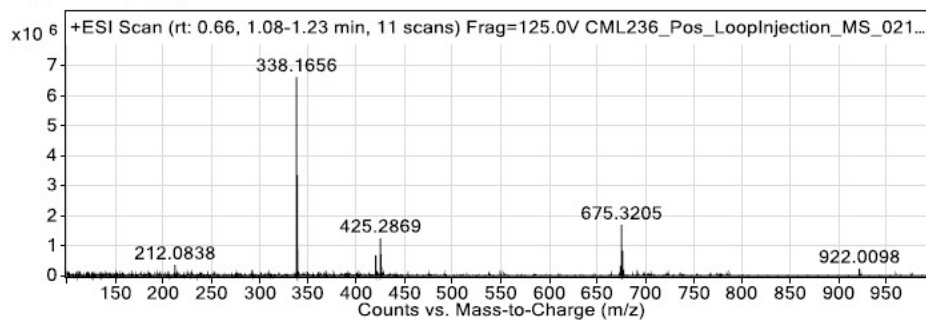

**Peak List**

| <i>m/z</i> | <i>z</i> | Abund      |
|------------|----------|------------|
| 212.0838   |          | 370934.99  |
| 338.1656   | 2        | 6733966.59 |
| 338.667    | 2        | 3552150.66 |
| 339.1688   | 2        | 886451.62  |
| 420.3316   | 1        | 686079.36  |
| 425.2869   | 1        | 1258124.17 |
| 426.2903   | 1        | 296723.65  |
| 674.3131   | 1        | 340699.57  |
| 675.3205   | 1        | 1721116.73 |
| 676.3241   | 1        | 847936.95  |

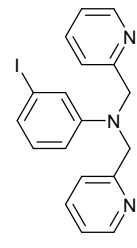

7, 500 MHz, CDCl<sub>3</sub>

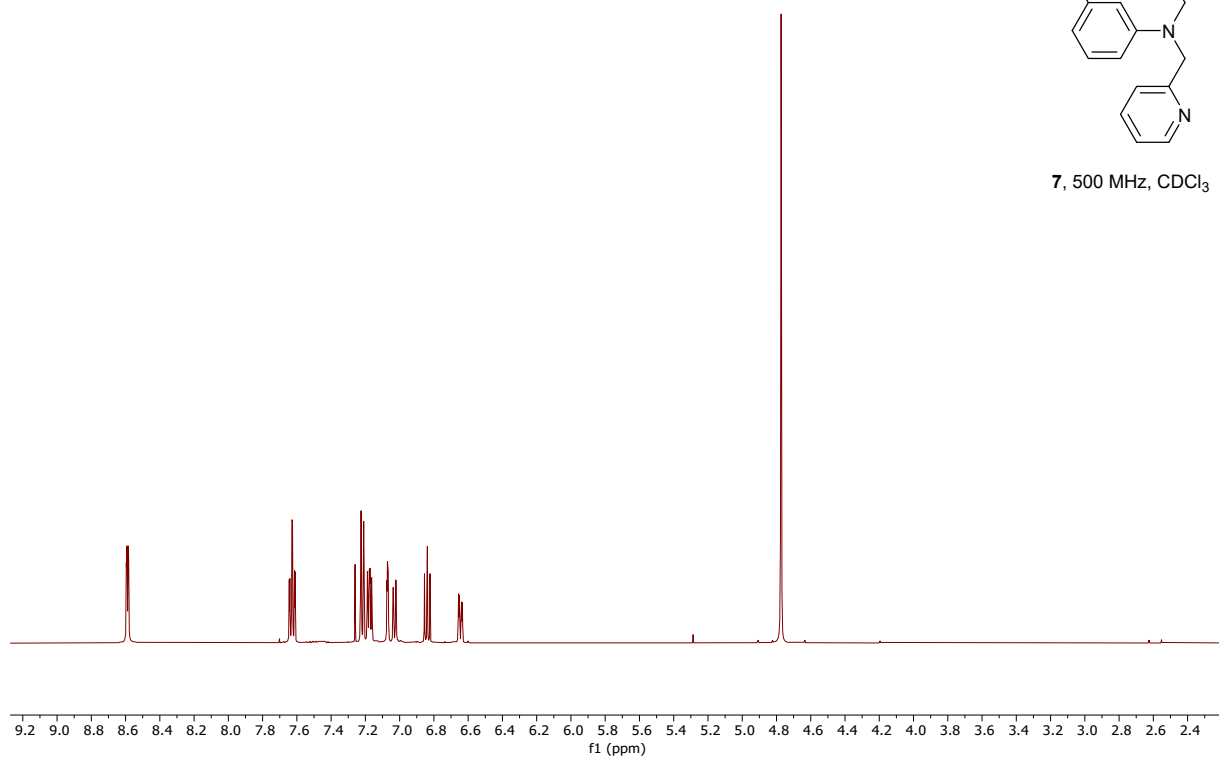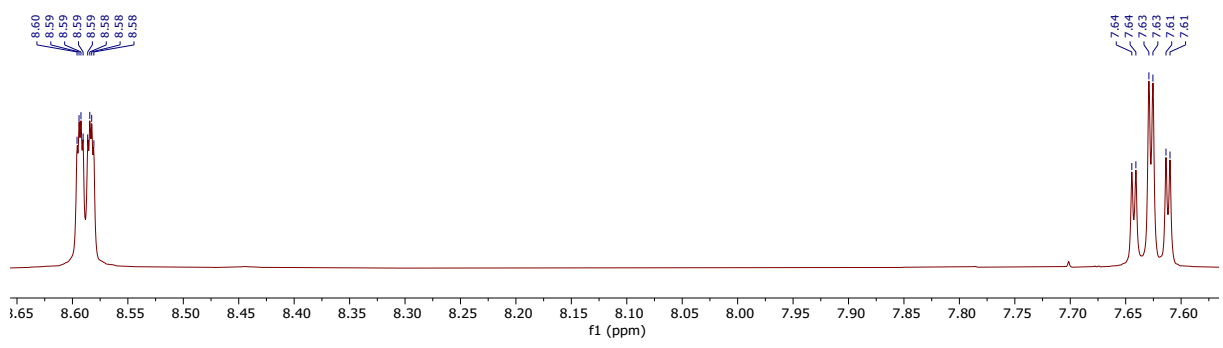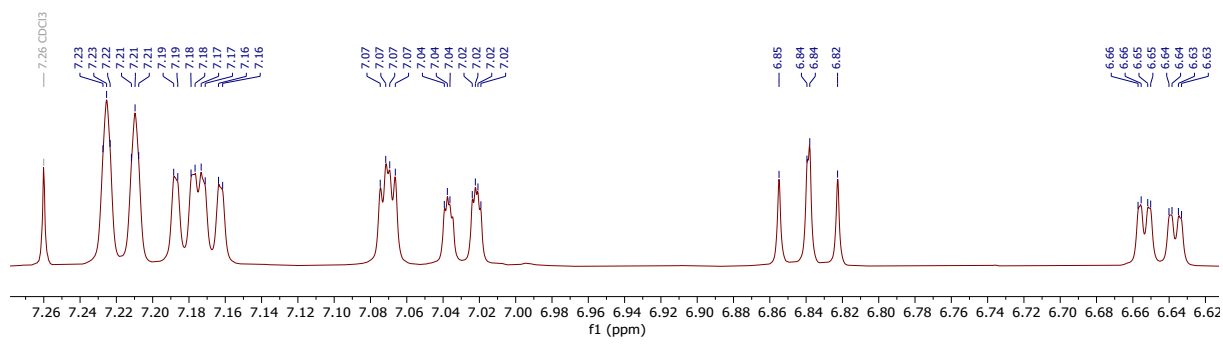

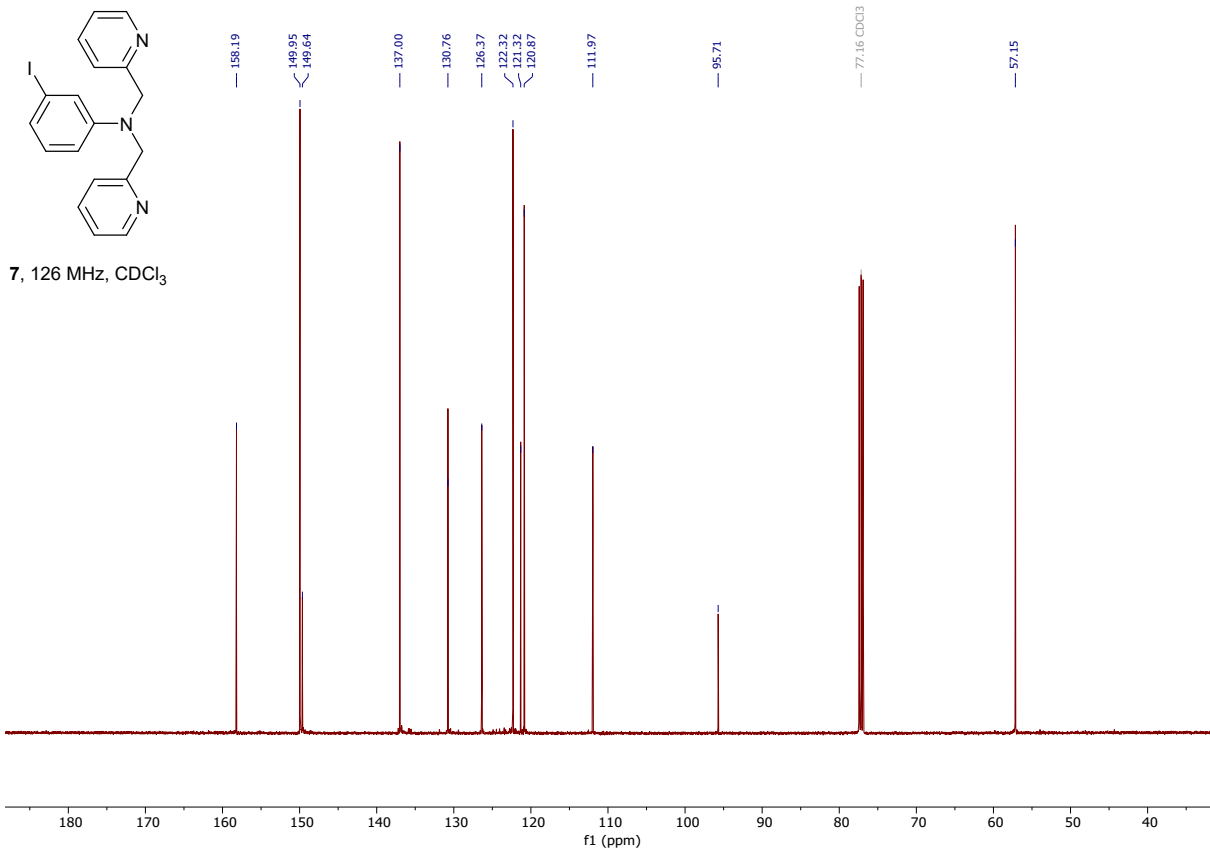

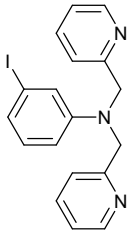

7

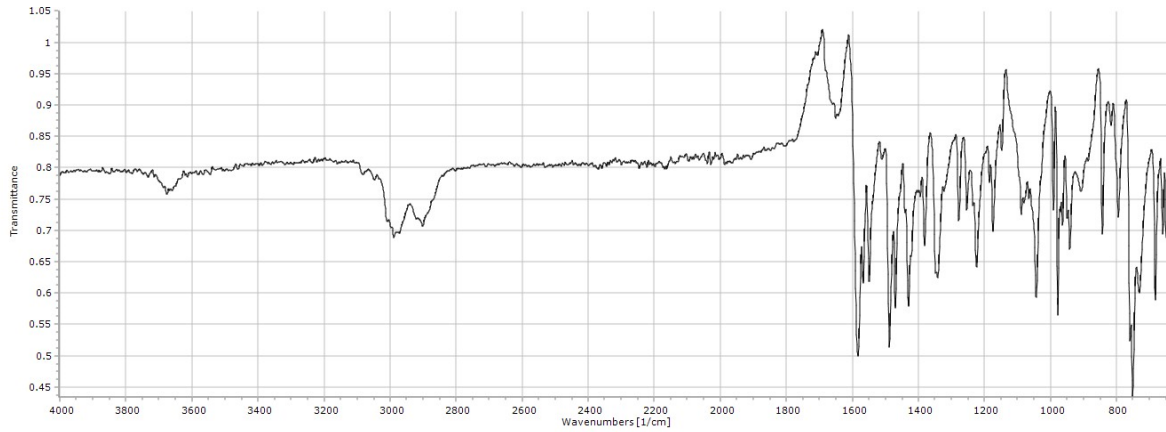

Spectrum Source Peak (1) in "+ BPC(all [-4]) Scan"      Fragmentor Voltage 125      Collision Energy 0      Ionization Mode ESI

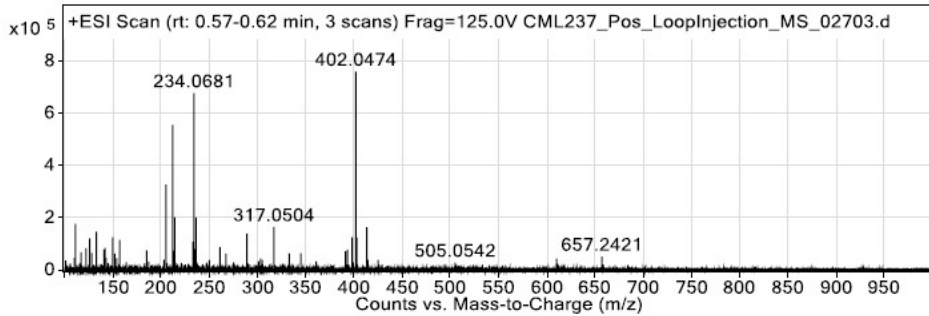

Peak List

| <i>m/z</i> | <i>z</i> | Abund     |
|------------|----------|-----------|
| 84.9615    |          | 340914.57 |
| 111.0224   | 1        | 180109.84 |
| 205.0705   | 1        | 348810.47 |
| 212.0861   | 1        | 571935.09 |
| 214.0832   | 1        | 202816.09 |
| 234.0681   | 1        | 680266.13 |
| 236.0652   | 1        | 208056.44 |
| 317.0504   | 1        | 164647.28 |
| 402.0474   | 1        | 795500.47 |
| 413.2681   | 1        | 163938.39 |

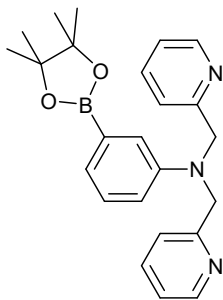

8, 500 MHz, CDCl<sub>3</sub>

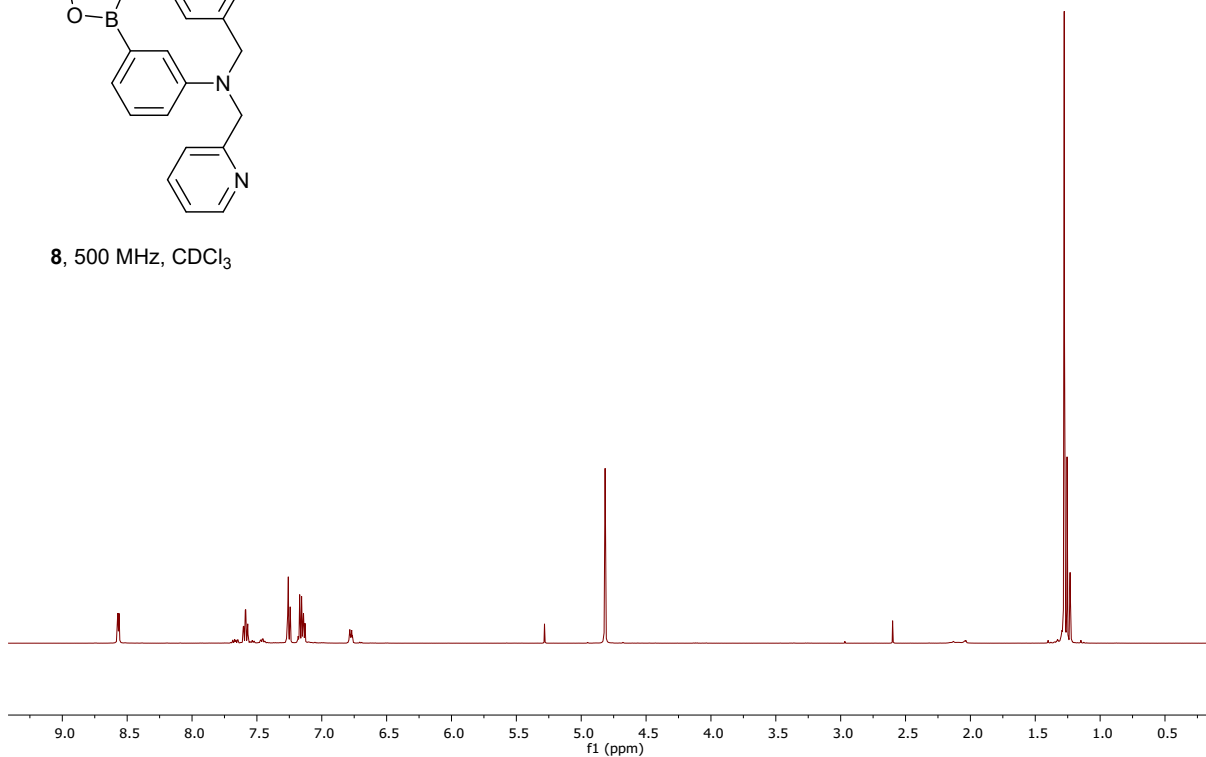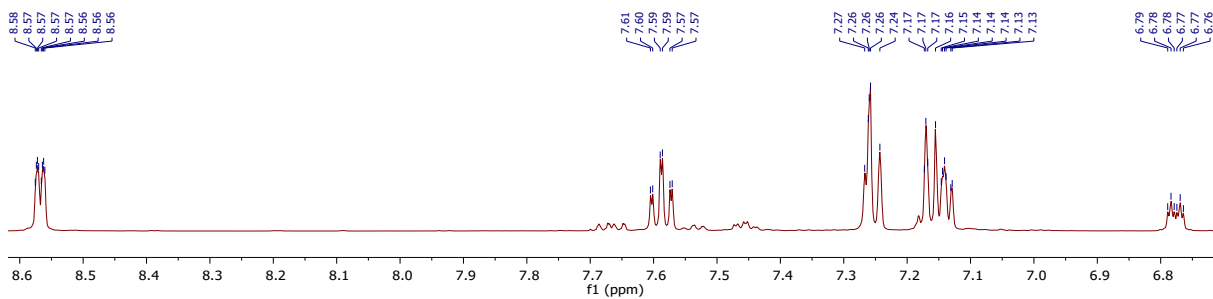

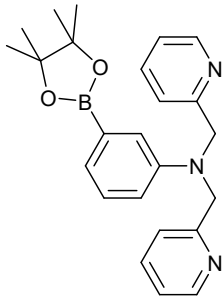

8, 126 MHz, CDCl<sub>3</sub>

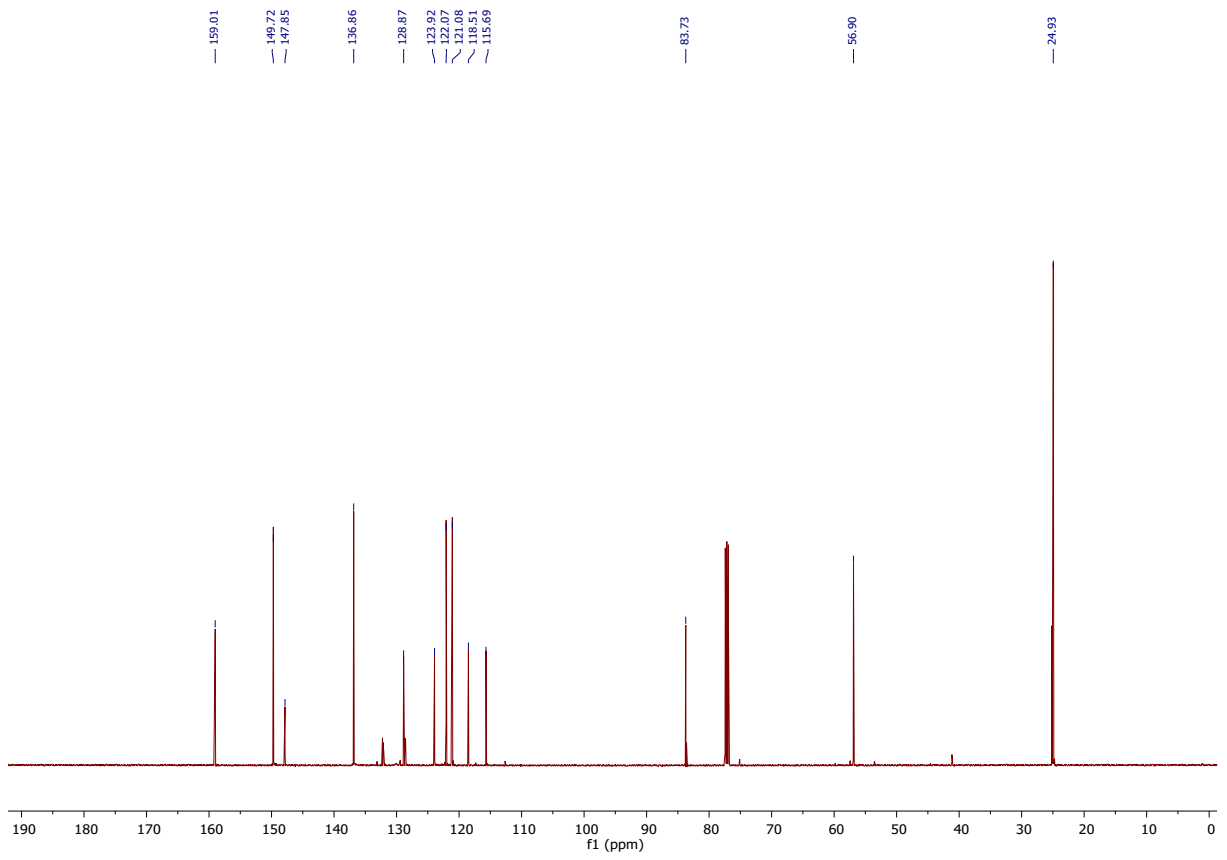

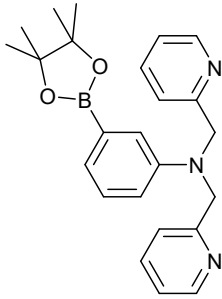

8

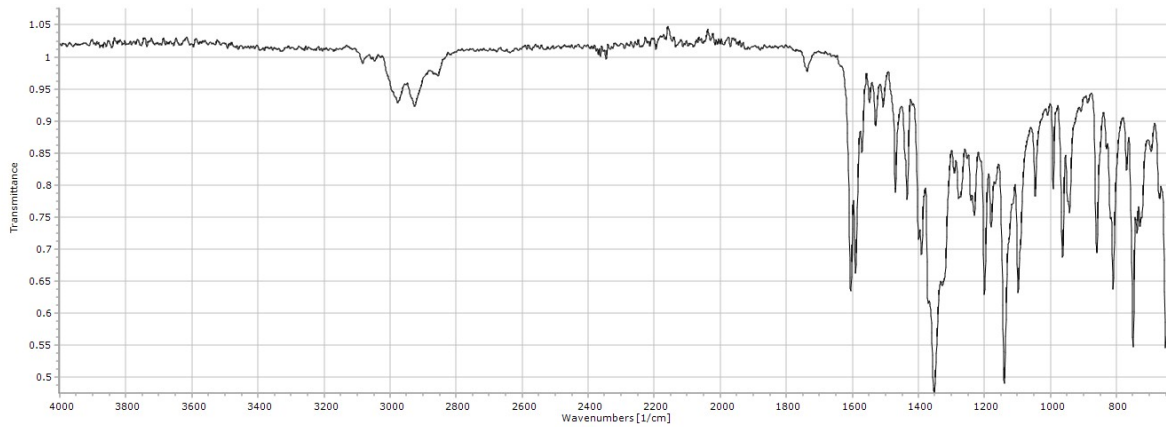

Spectrum Source: Peak (1) in "+ BPC(all [-4]) Scan"  
 Fragmentor Voltage: 125  
 Collision Energy: 0  
 Ionization Mode: ESI

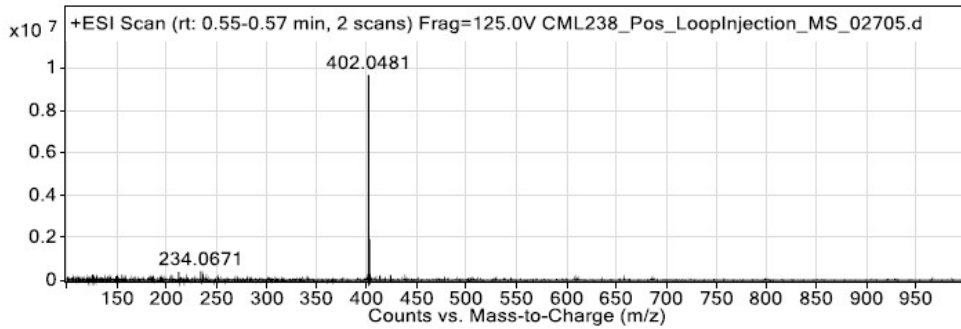

Compound specific information

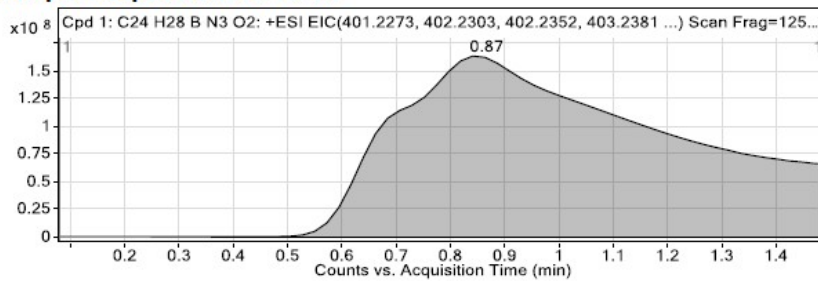

User Chromatogram Peak List

| RT (min) | Area      | Area % | Area Sum (%) | Base Peak (m/z) | Width (min) |
|----------|-----------|--------|--------------|-----------------|-------------|
| 0.88     | 453336124 | 100.00 | 100.00       | 402.2351        | 0.520       |

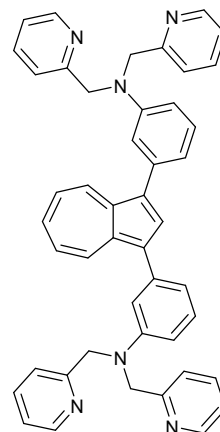

2, 500 MHz, Acetone-d<sub>6</sub>

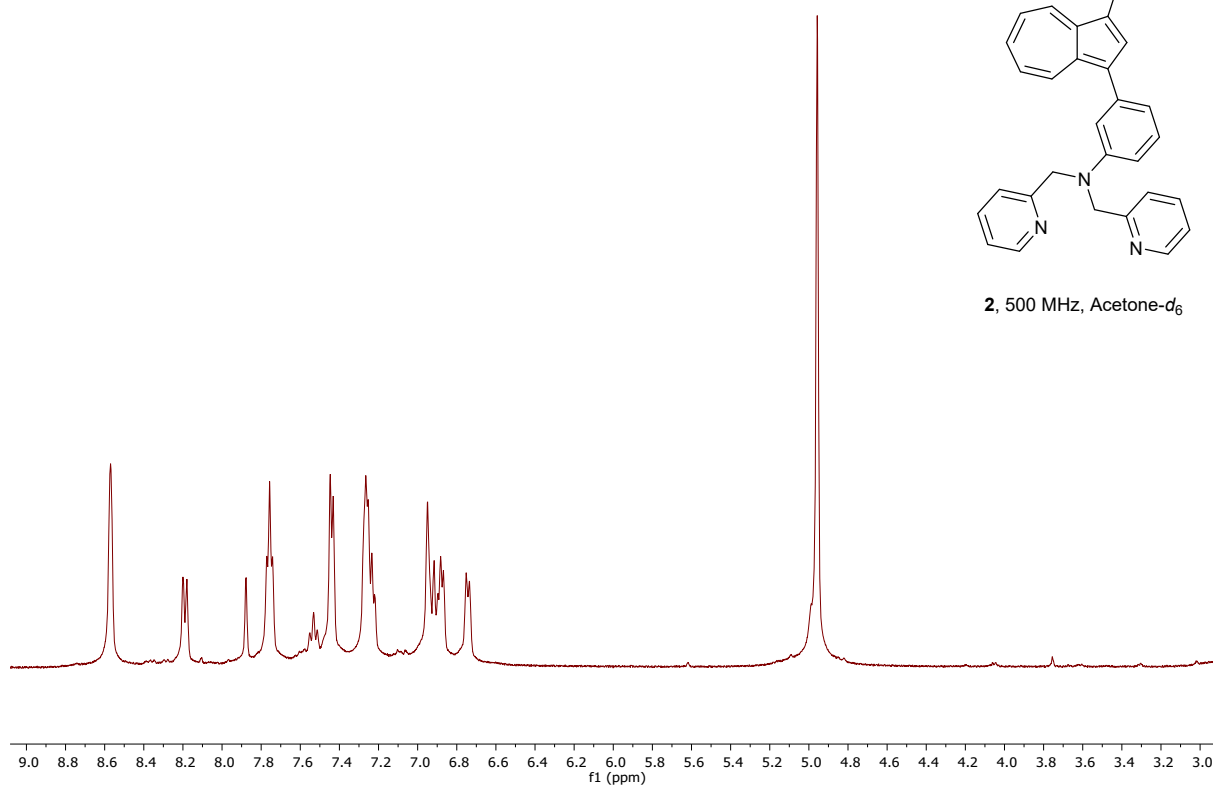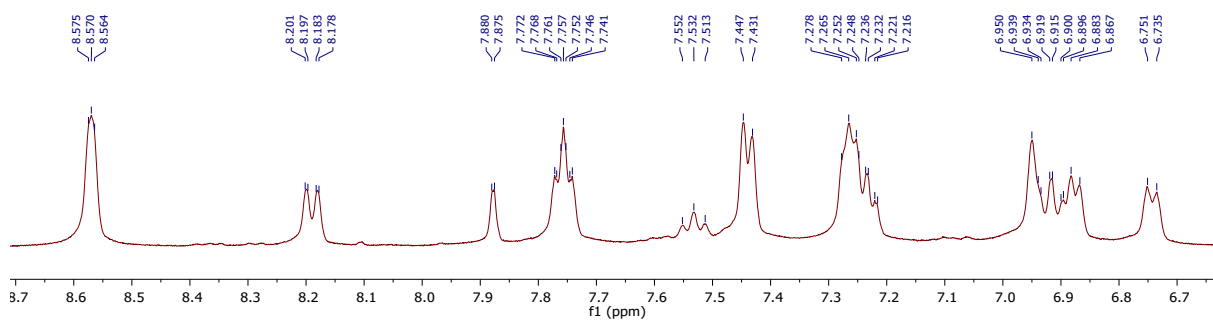



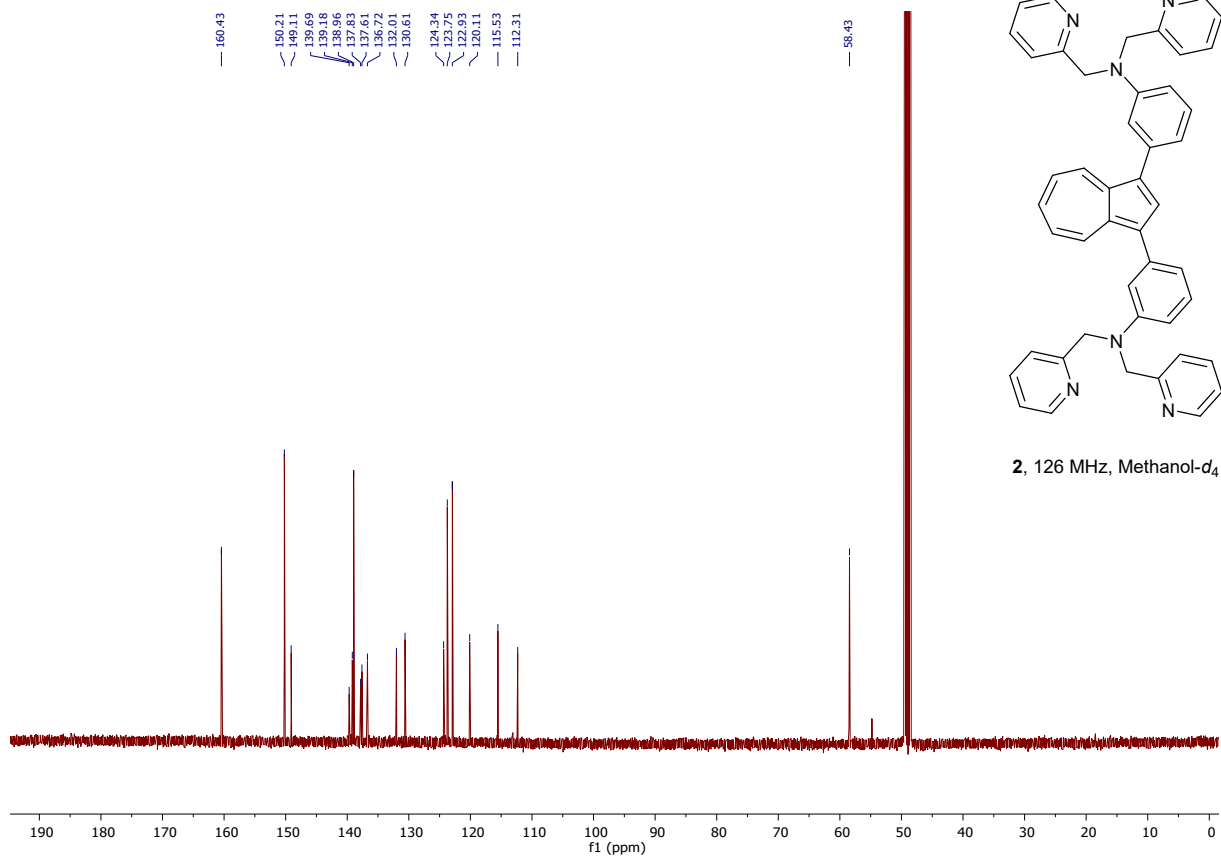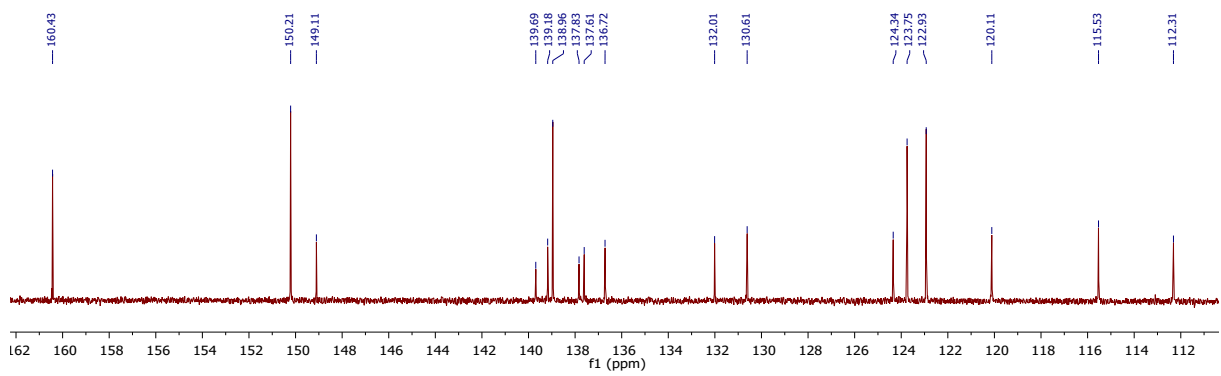

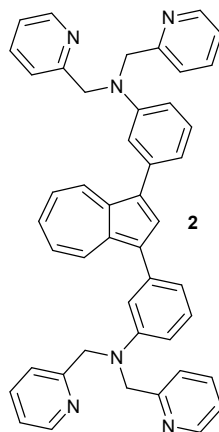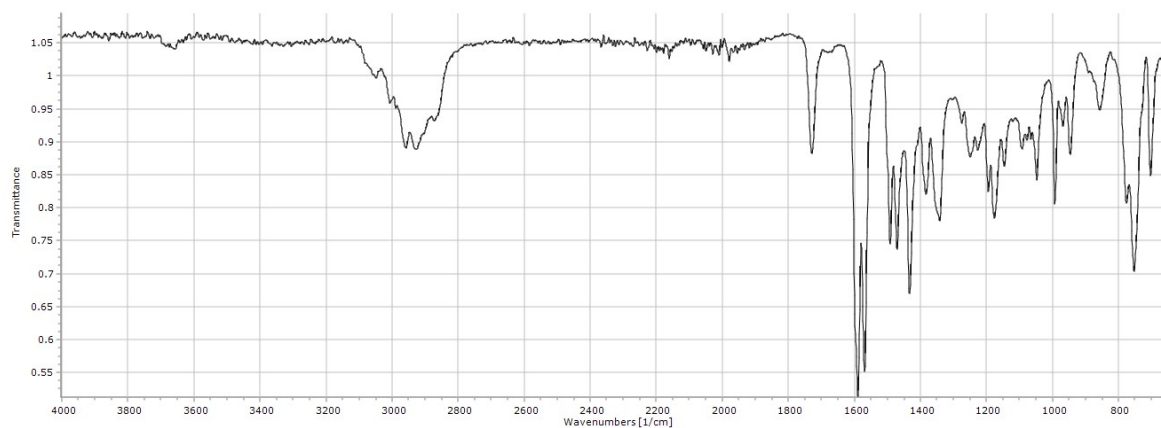

**Spectrum Source** Peak (1) in "+ BPC(all [-4]) Scan" **Fragmentor Voltage** 125 **Collision Energy** 0 **Ionization Mode** ESI

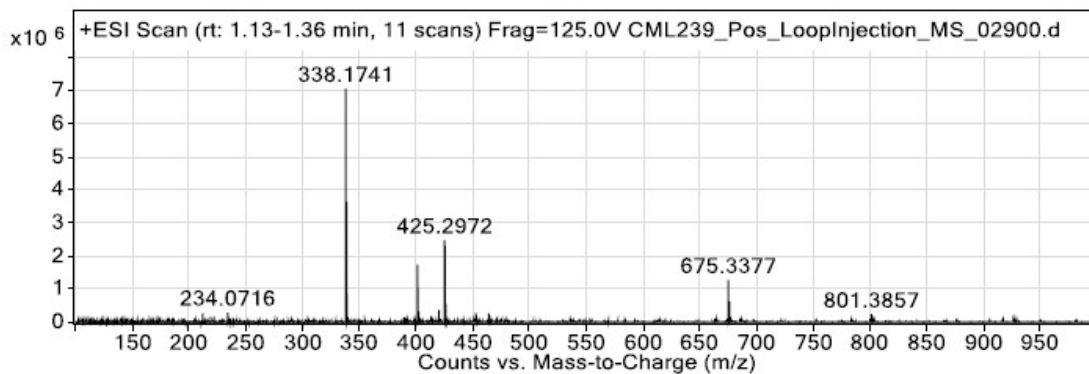

**Peak List**

| <i>m/z</i> | <i>z</i> | Abund      |
|------------|----------|------------|
| 338.1741   | 2        | 7075704.71 |
| 338.6755   | 2        | 3650049.72 |
| 339.1774   | 2        | 863190.13  |
| 401.1985   | 2        | 1772844    |
| 401.7003   | 2        | 1058551.49 |
| 420.3416   | 1        | 383217.18  |
| 425.2972   | 1        | 2501538.19 |
| 426.3009   | 1        | 553924.71  |
| 675.3377   | 1        | 1284119.39 |
| 676.3411   | 1        | 631124     |

## X-Ray crystallographic data for 1

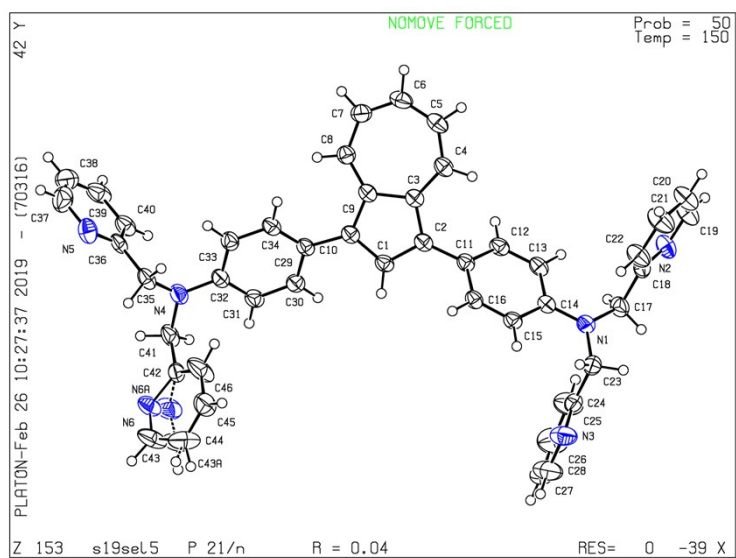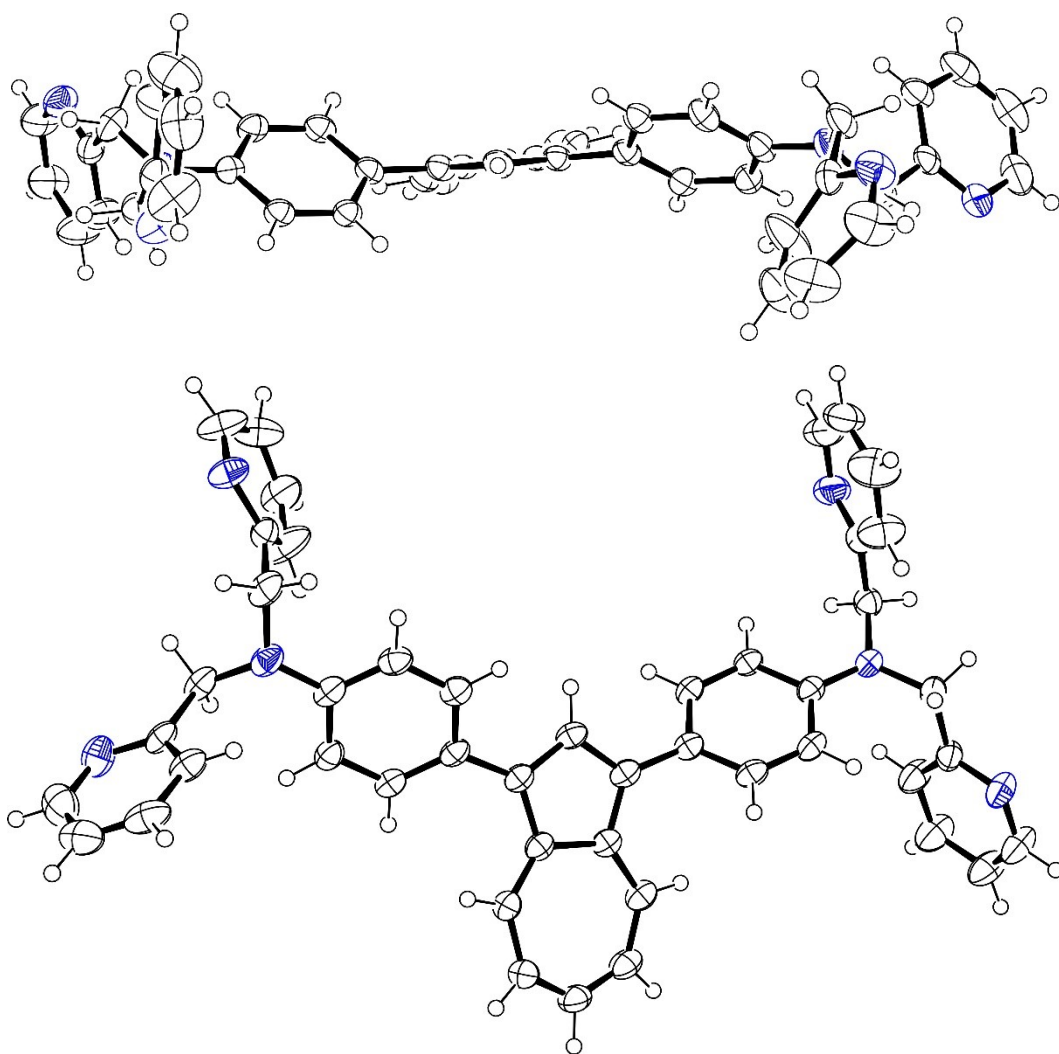

**Table S1.** Crystal data and structure refinement for **1**.

|                                   |                                                |                  |
|-----------------------------------|------------------------------------------------|------------------|
| Identification code               | s19sel5                                        |                  |
| Empirical formula                 | C <sub>46</sub> H <sub>38</sub> N <sub>6</sub> |                  |
| Formula weight                    | 674.82                                         |                  |
| Temperature                       | 150.00(10) K                                   |                  |
| Wavelength                        | 1.54184 Å                                      |                  |
| Crystal system                    | Monoclinic                                     |                  |
| Space group                       | P2 <sub>1</sub> /n                             |                  |
| Unit cell dimensions              | a = 13.4530(2) Å                               | α = 90°.         |
|                                   | b = 8.67130(10) Å                              | β = 90.0660(9)°. |
|                                   | c = 30.2422(3) Å                               | γ = 90°.         |
| Volume                            | 3527.90(8) Å <sup>3</sup>                      |                  |
| Z                                 | 4                                              |                  |
| Density (calculated)              | 1.271 Mg/m <sup>3</sup>                        |                  |
| Absorption coefficient            | 0.589 mm <sup>-1</sup>                         |                  |
| F(000)                            | 1424                                           |                  |
| Crystal size                      | 0.385 x 0.139 x 0.032 mm <sup>3</sup>          |                  |
| Theta range for data collection   | 2.922 to 72.940°.                              |                  |
| Index ranges                      | -16 ≤ h ≤ 16, -10 ≤ k ≤ 6, -37 ≤ l ≤ 37        |                  |
| Reflections collected             | 32405                                          |                  |
| Independent reflections           | 7022 [R(int) = 0.0350]                         |                  |
| Completeness to theta = 67.684°   | 100.0 %                                        |                  |
| Absorption correction             | Gaussian                                       |                  |
| Max. and min. transmission        | 1.000 and 0.670                                |                  |
| Refinement method                 | Full-matrix least-squares on F <sup>2</sup>    |                  |
| Data / restraints / parameters    | 7022 / 0 / 488                                 |                  |
| Goodness-of-fit on F <sup>2</sup> | 1.061                                          |                  |
| Final R indices [I > 2σ(I)]       | R1 = 0.0444, wR2 = 0.1087                      |                  |
| R indices (all data)              | R1 = 0.0551, wR2 = 0.1147                      |                  |
| Extinction coefficient            | n/a                                            |                  |
| Largest diff. peak and hole       | 0.223 and -0.274 e.Å <sup>-3</sup>             |                  |

**Table S2.** Atomic coordinates ( $\times 10^4$ ) and equivalent isotropic displacement parameters ( $\text{\AA}^2 \times 10^3$ ) for **1**.  $U(\text{eq})$  is defined as one third of the trace of the orthogonalized  $U^{ij}$  tensor.

|        | x        | y        | z       | U(eq) |
|--------|----------|----------|---------|-------|
| N(1)   | 2165(1)  | 11510(2) | 3740(1) | 38(1) |
| N(2)   | -251(1)  | 11594(2) | 4307(1) | 46(1) |
| N(3)   | 3715(1)  | 13302(2) | 2901(1) | 58(1) |
| N(4)   | 8034(1)  | 28(2)    | 3178(1) | 40(1) |
| N(5)   | 9551(1)  | -2847(2) | 3771(1) | 49(1) |
| C(1)   | 4828(1)  | 5128(2)  | 3888(1) | 32(1) |
| C(2)   | 4123(1)  | 5850(2)  | 4158(1) | 32(1) |
| C(3)   | 3963(1)  | 4872(2)  | 4527(1) | 31(1) |
| C(4)   | 3424(1)  | 5252(2)  | 4901(1) | 36(1) |
| C(5)   | 3251(1)  | 4377(2)  | 5280(1) | 41(1) |
| C(6)   | 3508(1)  | 2864(2)  | 5362(1) | 44(1) |
| C(7)   | 4031(1)  | 1832(2)  | 5099(1) | 43(1) |
| C(8)   | 4520(1)  | 2105(2)  | 4700(1) | 35(1) |
| C(9)   | 4568(1)  | 3452(2)  | 4454(1) | 31(1) |
| C(10)  | 5108(1)  | 3687(2)  | 4059(1) | 31(1) |
| C(11)  | 3627(1)  | 7327(2)  | 4067(1) | 31(1) |
| C(12)  | 2596(1)  | 7500(2)  | 4109(1) | 35(1) |
| C(13)  | 2114(1)  | 8862(2)  | 4005(1) | 36(1) |
| C(14)  | 2641(1)  | 10140(2) | 3844(1) | 32(1) |
| C(15)  | 3676(1)  | 9973(2)  | 3797(1) | 32(1) |
| C(16)  | 4146(1)  | 8613(2)  | 3913(1) | 32(1) |
| C(17)  | 1094(1)  | 11631(2) | 3785(1) | 41(1) |
| C(18)  | 724(1)   | 11829(2) | 4256(1) | 37(1) |
| C(19)  | -630(1)  | 11789(3) | 4711(1) | 55(1) |
| C(20)  | -84(1)   | 12200(3) | 5075(1) | 56(1) |
| C(21)  | 921(1)   | 12432(3) | 5019(1) | 60(1) |
| C(22)  | 1336(1)  | 12243(2) | 4604(1) | 50(1) |
| C(23)  | 2698(1)  | 12767(2) | 3531(1) | 38(1) |
| C(24)  | 2923(1)  | 12541(2) | 3043(1) | 38(1) |
| C(25)  | 2333(2)  | 11677(3) | 2766(1) | 64(1) |
| C(26)  | 2577(2)  | 11610(3) | 2317(1) | 78(1) |
| C(27)  | 3409(2)  | 12380(3) | 2172(1) | 66(1) |
| C(28)  | 3944(2)  | 13197(3) | 2474(1) | 71(1) |
| C(29)  | 5828(1)  | 2648(2)  | 3845(1) | 31(1) |
| C(30)  | 5894(1)  | 2627(2)  | 3382(1) | 35(1) |
| C(31)  | 6606(1)  | 1769(2)  | 3164(1) | 38(1) |
| C(32)  | 7296(1)  | 867(2)   | 3395(1) | 35(1) |
| C(33)  | 7215(1)  | 840(2)   | 3860(1) | 35(1) |
| C(34)  | 6504(1)  | 1728(2)  | 4074(1) | 34(1) |
| C(35)  | 8870(1)  | -591(2)  | 3424(1) | 39(1) |
| C(36)  | 8759(1)  | -2248(2) | 3564(1) | 35(1) |
| C(37)  | 9484(2)  | -4308(2) | 3906(1) | 60(1) |
| C(38)  | 8665(2)  | -5225(2) | 3845(1) | 59(1) |
| C(39)  | 7860(2)  | -4604(2) | 3628(1) | 53(1) |
| C(40)  | 7900(1)  | -3091(2) | 3483(1) | 41(1) |
| C(41)  | 8210(1)  | 225(2)   | 2708(1) | 44(1) |
| C(42)  | 8873(1)  | 1582(2)  | 2595(1) | 37(1) |
| C(43)  | 10088(6) | 2477(9)  | 2126(2) | 64(2) |
| N(6)   | 9446(5)  | 1352(7)  | 2226(2) | 49(1) |
| C(43A) | 9579(14) | 3042(14) | 2082(2) | 74(3) |
| N(6A)  | 9062(11) | 1786(14) | 2198(2) | 60(2) |
| C(44)  | 10104(2) | 3919(3)  | 2363(1) | 69(1) |
| C(45)  | 9657(2)  | 3986(2)  | 2757(1) | 60(1) |
| C(46)  | 9039(2)  | 2788(2)  | 2878(1) | 75(1) |

**Table S3.** Bond lengths [Å] for **1**.

|              |            |               |           |
|--------------|------------|---------------|-----------|
| N(1)-C(14)   | 1.385(2)   | C(22)-H(22)   | 0.9500    |
| N(1)-C(23)   | 1.450(2)   | C(23)-C(24)   | 1.518(2)  |
| N(1)-C(17)   | 1.4503(19) | C(23)-H(23A)  | 0.9900    |
| N(2)-C(19)   | 1.336(2)   | C(23)-H(23B)  | 0.9900    |
| N(2)-C(18)   | 1.336(2)   | C(24)-C(25)   | 1.375(3)  |
| N(3)-C(24)   | 1.326(2)   | C(25)-C(26)   | 1.397(3)  |
| N(3)-C(28)   | 1.331(3)   | C(25)-H(25)   | 0.9500    |
| N(4)-C(32)   | 1.3957(19) | C(26)-C(27)   | 1.376(4)  |
| N(4)-C(41)   | 1.451(2)   | C(26)-H(26)   | 0.9500    |
| N(4)-C(35)   | 1.451(2)   | C(27)-C(28)   | 1.360(3)  |
| N(5)-C(37)   | 1.334(3)   | C(27)-H(27)   | 0.9500    |
| N(5)-C(36)   | 1.341(2)   | C(28)-H(28)   | 0.9500    |
| C(1)-C(2)    | 1.400(2)   | C(29)-C(34)   | 1.394(2)  |
| C(1)-C(10)   | 1.403(2)   | C(29)-C(30)   | 1.401(2)  |
| C(1)-H(1)    | 0.9500     | C(30)-C(31)   | 1.381(2)  |
| C(2)-C(3)    | 1.419(2)   | C(30)-H(30)   | 0.9500    |
| C(2)-C(11)   | 1.470(2)   | C(31)-C(32)   | 1.400(2)  |
| C(3)-C(4)    | 1.384(2)   | C(31)-H(31)   | 0.9500    |
| C(3)-C(9)    | 1.492(2)   | C(32)-C(33)   | 1.409(2)  |
| C(4)-C(5)    | 1.395(2)   | C(33)-C(34)   | 1.390(2)  |
| C(4)-H(4)    | 0.9500     | C(33)-H(33)   | 0.9500    |
| C(5)-C(6)    | 1.379(3)   | C(34)-H(34)   | 0.9500    |
| C(5)-H(5)    | 0.9500     | C(35)-C(36)   | 1.505(2)  |
| C(6)-C(7)    | 1.389(2)   | C(35)-H(35A)  | 0.9900    |
| C(6)-H(6)    | 0.9500     | C(35)-H(35B)  | 0.9900    |
| C(7)-C(8)    | 1.396(2)   | C(36)-C(40)   | 1.388(2)  |
| C(7)-H(7)    | 0.9500     | C(37)-C(38)   | 1.372(3)  |
| C(8)-C(9)    | 1.386(2)   | C(37)-H(37)   | 0.9500    |
| C(8)-H(8)    | 0.9500     | C(38)-C(39)   | 1.375(3)  |
| C(9)-C(10)   | 1.4123(19) | C(38)-H(38)   | 0.9500    |
| C(10)-C(29)  | 1.4747(19) | C(39)-C(40)   | 1.384(3)  |
| C(11)-C(16)  | 1.397(2)   | C(39)-H(39)   | 0.9500    |
| C(11)-C(12)  | 1.401(2)   | C(40)-H(40)   | 0.9500    |
| C(12)-C(13)  | 1.384(2)   | C(41)-C(42)   | 1.516(2)  |
| C(12)-H(12)  | 0.9500     | C(41)-H(41A)  | 0.9900    |
| C(13)-C(14)  | 1.404(2)   | C(41)-H(41B)  | 0.9900    |
| C(13)-H(13)  | 0.9500     | C(42)-N(6A)   | 1.243(7)  |
| C(14)-C(15)  | 1.4073(19) | C(42)-C(46)   | 1.368(3)  |
| C(15)-C(16)  | 1.383(2)   | C(42)-N(6)    | 1.373(5)  |
| C(15)-H(15)  | 0.9500     | C(43)-N(6)    | 1.338(6)  |
| C(16)-H(16)  | 0.9500     | C(43)-C(44)   | 1.441(7)  |
| C(17)-C(18)  | 1.518(2)   | C(43)-H(43)   | 0.9500    |
| C(17)-H(17A) | 0.9900     | C(43A)-N(6A)  | 1.339(12) |
| C(17)-H(17B) | 0.9900     | C(43A)-C(44)  | 1.341(10) |
| C(18)-C(22)  | 1.384(2)   | C(43A)-H(43A) | 0.9500    |
| C(19)-C(20)  | 1.370(3)   | C(44)-C(45)   | 1.337(3)  |
| C(19)-H(19)  | 0.9500     | C(44)-H(44)   | 0.9500    |
| C(20)-C(21)  | 1.377(3)   | C(44)-H(44A)  | 0.9500    |
| C(20)-H(20)  | 0.9500     | C(45)-C(46)   | 1.380(3)  |
| C(21)-C(22)  | 1.384(3)   | C(45)-H(45)   | 0.9500    |
| C(21)-H(21)  | 0.9500     | C(46)-H(46)   | 0.9500    |

**Table S4.** Bond angles [°] for **1**.

|                   |            |                     |            |
|-------------------|------------|---------------------|------------|
| C(14)-N(1)-C(23)  | 120.94(12) | N(1)-C(17)-H(17A)   | 108.5      |
| C(14)-N(1)-C(17)  | 119.96(13) | C(18)-C(17)-H(17A)  | 108.5      |
| C(23)-N(1)-C(17)  | 118.61(13) | N(1)-C(17)-H(17B)   | 108.5      |
| C(19)-N(2)-C(18)  | 117.57(15) | C(18)-C(17)-H(17B)  | 108.5      |
| C(24)-N(3)-C(28)  | 117.98(19) | H(17A)-C(17)-H(17B) | 107.5      |
| C(32)-N(4)-C(41)  | 121.06(14) | N(2)-C(18)-C(22)    | 122.31(15) |
| C(32)-N(4)-C(35)  | 120.19(13) | N(2)-C(18)-C(17)    | 114.53(14) |
| C(41)-N(4)-C(35)  | 114.81(13) | C(22)-C(18)-C(17)   | 123.14(14) |
| C(37)-N(5)-C(36)  | 117.27(17) | N(2)-C(19)-C(20)    | 124.23(16) |
| C(2)-C(1)-C(10)   | 111.38(13) | N(2)-C(19)-H(19)    | 117.9      |
| C(2)-C(1)-H(1)    | 124.3      | C(20)-C(19)-H(19)   | 117.9      |
| C(10)-C(1)-H(1)   | 124.3      | C(19)-C(20)-C(21)   | 117.74(17) |
| C(1)-C(2)-C(3)    | 107.14(13) | C(19)-C(20)-H(20)   | 121.1      |
| C(1)-C(2)-C(11)   | 126.12(13) | C(21)-C(20)-H(20)   | 121.1      |
| C(3)-C(2)-C(11)   | 126.73(13) | C(20)-C(21)-C(22)   | 119.42(17) |
| C(4)-C(3)-C(2)    | 125.51(14) | C(20)-C(21)-H(21)   | 120.3      |
| C(4)-C(3)-C(9)    | 127.16(14) | C(22)-C(21)-H(21)   | 120.3      |
| C(2)-C(3)-C(9)    | 107.05(12) | C(18)-C(22)-C(21)   | 118.73(16) |
| C(3)-C(4)-C(5)    | 129.07(15) | C(18)-C(22)-H(22)   | 120.6      |
| C(3)-C(4)-H(4)    | 115.5      | C(21)-C(22)-H(22)   | 120.6      |
| C(5)-C(4)-H(4)    | 115.5      | N(1)-C(23)-C(24)    | 115.15(13) |
| C(6)-C(5)-C(4)    | 128.54(15) | N(1)-C(23)-H(23A)   | 108.5      |
| C(6)-C(5)-H(5)    | 115.7      | C(24)-C(23)-H(23A)  | 108.5      |
| C(4)-C(5)-H(5)    | 115.7      | N(1)-C(23)-H(23B)   | 108.5      |
| C(5)-C(6)-C(7)    | 129.59(15) | C(24)-C(23)-H(23B)  | 108.5      |
| C(5)-C(6)-H(6)    | 115.2      | H(23A)-C(23)-H(23B) | 107.5      |
| C(7)-C(6)-H(6)    | 115.2      | N(3)-C(24)-C(25)    | 122.34(17) |
| C(6)-C(7)-C(8)    | 128.71(16) | N(3)-C(24)-C(23)    | 114.39(15) |
| C(6)-C(7)-H(7)    | 115.6      | C(25)-C(24)-C(23)   | 123.22(15) |
| C(8)-C(7)-H(7)    | 115.6      | C(24)-C(25)-C(26)   | 118.7(2)   |
| C(9)-C(8)-C(7)    | 128.99(15) | C(24)-C(25)-H(25)   | 120.7      |
| C(9)-C(8)-H(8)    | 115.5      | C(26)-C(25)-H(25)   | 120.7      |
| C(7)-C(8)-H(8)    | 115.5      | C(27)-C(26)-C(25)   | 118.8(2)   |
| C(8)-C(9)-C(10)   | 126.80(14) | C(27)-C(26)-H(26)   | 120.6      |
| C(8)-C(9)-C(3)    | 126.15(13) | C(25)-C(26)-H(26)   | 120.6      |
| C(10)-C(9)-C(3)   | 106.70(13) | C(28)-C(27)-C(26)   | 118.0(2)   |
| C(1)-C(10)-C(9)   | 107.61(13) | C(28)-C(27)-H(27)   | 121.0      |
| C(1)-C(10)-C(29)  | 123.88(13) | C(26)-C(27)-H(27)   | 121.0      |
| C(9)-C(10)-C(29)  | 128.50(14) | N(3)-C(28)-C(27)    | 124.2(2)   |
| C(16)-C(11)-C(12) | 116.14(14) | N(3)-C(28)-H(28)    | 117.9      |
| C(16)-C(11)-C(2)  | 122.07(13) | C(27)-C(28)-H(28)   | 117.9      |
| C(12)-C(11)-C(2)  | 121.71(13) | C(34)-C(29)-C(30)   | 116.56(13) |
| C(13)-C(12)-C(11) | 122.31(13) | C(34)-C(29)-C(10)   | 124.02(13) |
| C(13)-C(12)-H(12) | 118.8      | C(30)-C(29)-C(10)   | 119.31(13) |
| C(11)-C(12)-H(12) | 118.8      | C(31)-C(30)-C(29)   | 121.93(15) |
| C(12)-C(13)-C(14) | 121.10(13) | C(31)-C(30)-H(30)   | 119.0      |
| C(12)-C(13)-H(13) | 119.4      | C(29)-C(30)-H(30)   | 119.0      |
| C(14)-C(13)-H(13) | 119.4      | C(30)-C(31)-C(32)   | 121.45(14) |
| N(1)-C(14)-C(13)  | 121.48(13) | C(30)-C(31)-H(31)   | 119.3      |
| N(1)-C(14)-C(15)  | 121.54(13) | C(32)-C(31)-H(31)   | 119.3      |
| C(13)-C(14)-C(15) | 116.98(14) | N(4)-C(32)-C(31)    | 121.88(14) |
| C(16)-C(15)-C(14) | 121.01(13) | N(4)-C(32)-C(33)    | 121.03(15) |
| C(16)-C(15)-H(15) | 119.5      | C(31)-C(32)-C(33)   | 117.08(13) |
| C(14)-C(15)-H(15) | 119.5      | C(34)-C(33)-C(32)   | 120.66(14) |
| C(15)-C(16)-C(11) | 122.44(13) | C(34)-C(33)-H(33)   | 119.7      |
| C(15)-C(16)-H(16) | 118.8      | C(32)-C(33)-H(33)   | 119.7      |
| C(11)-C(16)-H(16) | 118.8      | C(33)-C(34)-C(29)   | 122.26(14) |
| N(1)-C(17)-C(18)  | 115.13(13) | C(33)-C(34)-H(34)   | 118.9      |

|                     |            |                     |            |
|---------------------|------------|---------------------|------------|
| C(29)-C(34)-H(34)   | 118.9      | H(41A)-C(41)-H(41B) | 107.6      |
| N(4)-C(35)-C(36)    | 114.80(13) | N(6A)-C(42)-C(46)   | 117.5(5)   |
| N(4)-C(35)-H(35A)   | 108.6      | C(46)-C(42)-N(6)    | 121.8(2)   |
| C(36)-C(35)-H(35A)  | 108.6      | N(6A)-C(42)-C(41)   | 116.7(4)   |
| N(4)-C(35)-H(35B)   | 108.6      | C(46)-C(42)-C(41)   | 123.32(15) |
| C(36)-C(35)-H(35B)  | 108.6      | N(6)-C(42)-C(41)    | 113.7(2)   |
| H(35A)-C(35)-H(35B) | 107.5      | N(6)-C(43)-C(44)    | 122.0(4)   |
| N(5)-C(36)-C(40)    | 122.55(16) | N(6)-C(43)-H(43)    | 119.0      |
| N(5)-C(36)-C(35)    | 114.95(14) | C(44)-C(43)-H(43)   | 119.0      |
| C(40)-C(36)-C(35)   | 122.50(15) | C(43)-N(6)-C(42)    | 116.2(4)   |
| N(5)-C(37)-C(38)    | 124.2(2)   | N(6A)-C(43A)-C(44)  | 124.6(6)   |
| N(5)-C(37)-H(37)    | 117.9      | N(6A)-C(43A)-H(43A) | 117.7      |
| C(38)-C(37)-H(37)   | 117.9      | C(44)-C(43A)-H(43A) | 117.7      |
| C(37)-C(38)-C(39)   | 118.07(18) | C(42)-N(6A)-C(43A)  | 118.5(7)   |
| C(37)-C(38)-H(38)   | 121.0      | C(45)-C(44)-C(43A)  | 110.7(5)   |
| C(39)-C(38)-H(38)   | 121.0      | C(45)-C(44)-C(43)   | 118.3(2)   |
| C(38)-C(39)-C(40)   | 119.35(18) | C(45)-C(44)-H(44)   | 120.8      |
| C(38)-C(39)-H(39)   | 120.3      | C(43)-C(44)-H(44)   | 120.8      |
| C(40)-C(39)-H(39)   | 120.3      | C(45)-C(44)-H(44A)  | 124.6      |
| C(39)-C(40)-C(36)   | 118.52(18) | C(43A)-C(44)-H(44A) | 124.6      |
| C(39)-C(40)-H(40)   | 120.7      | C(44)-C(45)-C(46)   | 118.3(2)   |
| C(36)-C(40)-H(40)   | 120.7      | C(44)-C(45)-H(45)   | 120.9      |
| N(4)-C(41)-C(42)    | 114.04(13) | C(46)-C(45)-H(45)   | 120.9      |
| N(4)-C(41)-H(41A)   | 108.7      | C(42)-C(46)-C(45)   | 120.63(18) |
| C(42)-C(41)-H(41A)  | 108.7      | C(42)-C(46)-H(46)   | 119.7      |
| N(4)-C(41)-H(41B)   | 108.7      | C(45)-C(46)-H(46)   | 119.7      |
| C(42)-C(41)-H(41B)  | 108.7      |                     |            |

---

Symmetry transformations used to generate equivalent atoms:



**Table S5.** Anisotropic displacement parameters ( $\text{\AA}^2 \times 10^3$ ) for **1**. The anisotropic displacement factor exponent takes the form:  $-2\pi^2 [ h^2 a^*2U^{11} + \dots + 2 h k a^* b^* U^{12} ]$

|        | U <sup>11</sup> | U <sup>22</sup> | U <sup>33</sup> | U <sup>23</sup> | U <sup>13</sup> | U <sup>12</sup> |
|--------|-----------------|-----------------|-----------------|-----------------|-----------------|-----------------|
| N(1)   | 31(1)           | 44(1)           | 40(1)           | 6(1)            | 6(1)            | 3(1)            |
| N(2)   | 30(1)           | 60(1)           | 48(1)           | -10(1)          | 4(1)            | 2(1)            |
| N(3)   | 45(1)           | 78(1)           | 50(1)           | 20(1)           | 2(1)            | -10(1)          |
| N(4)   | 42(1)           | 34(1)           | 46(1)           | -8(1)           | 14(1)           | 0(1)            |
| N(5)   | 45(1)           | 46(1)           | 57(1)           | -16(1)          | 2(1)            | 4(1)            |
| C(1)   | 33(1)           | 32(1)           | 33(1)           | -3(1)           | 7(1)            | -7(1)           |
| C(2)   | 31(1)           | 31(1)           | 34(1)           | -5(1)           | 4(1)            | -6(1)           |
| C(3)   | 29(1)           | 32(1)           | 32(1)           | -5(1)           | 1(1)            | -6(1)           |
| C(4)   | 35(1)           | 39(1)           | 34(1)           | -9(1)           | 4(1)            | -4(1)           |
| C(5)   | 38(1)           | 56(1)           | 30(1)           | -7(1)           | 5(1)            | -2(1)           |
| C(6)   | 38(1)           | 65(1)           | 29(1)           | 7(1)            | 4(1)            | -2(1)           |
| C(7)   | 37(1)           | 50(1)           | 41(1)           | 12(1)           | 2(1)            | 1(1)            |
| C(8)   | 30(1)           | 38(1)           | 37(1)           | 1(1)            | 1(1)            | 0(1)            |
| C(9)   | 27(1)           | 35(1)           | 31(1)           | -5(1)           | 1(1)            | -4(1)           |
| C(10)  | 28(1)           | 31(1)           | 34(1)           | -4(1)           | 2(1)            | -6(1)           |
| C(11)  | 33(1)           | 30(1)           | 31(1)           | -6(1)           | 4(1)            | -3(1)           |
| C(12)  | 32(1)           | 35(1)           | 38(1)           | -3(1)           | 7(1)            | -9(1)           |
| C(13)  | 25(1)           | 43(1)           | 38(1)           | -4(1)           | 6(1)            | -4(1)           |
| C(14)  | 29(1)           | 36(1)           | 29(1)           | -3(1)           | 2(1)            | -1(1)           |
| C(15)  | 28(1)           | 33(1)           | 35(1)           | -1(1)           | 4(1)            | -6(1)           |
| C(16)  | 26(1)           | 34(1)           | 36(1)           | -4(1)           | 4(1)            | -4(1)           |
| C(17)  | 30(1)           | 55(1)           | 39(1)           | 3(1)            | 1(1)            | 8(1)            |
| C(18)  | 31(1)           | 37(1)           | 42(1)           | 0(1)            | 3(1)            | 5(1)            |
| C(19)  | 33(1)           | 74(1)           | 56(1)           | -16(1)          | 12(1)           | -4(1)           |
| C(20)  | 47(1)           | 73(1)           | 48(1)           | -16(1)          | 14(1)           | -6(1)           |
| C(21)  | 45(1)           | 89(2)           | 45(1)           | -18(1)          | 3(1)            | -10(1)          |
| C(22)  | 33(1)           | 71(1)           | 47(1)           | -9(1)           | 4(1)            | -6(1)           |
| C(23)  | 38(1)           | 34(1)           | 42(1)           | 1(1)            | 0(1)            | 3(1)            |
| C(24)  | 37(1)           | 36(1)           | 42(1)           | 9(1)            | 1(1)            | 6(1)            |
| C(25)  | 76(1)           | 68(1)           | 50(1)           | -6(1)           | 6(1)            | -23(1)          |
| C(26)  | 111(2)          | 76(2)           | 49(1)           | -11(1)          | -1(1)           | -14(1)          |
| C(27)  | 88(2)           | 67(1)           | 43(1)           | 17(1)           | 15(1)           | 16(1)           |
| C(28)  | 58(1)           | 102(2)          | 52(1)           | 25(1)           | 9(1)            | -7(1)           |
| C(29)  | 29(1)           | 29(1)           | 36(1)           | -4(1)           | 7(1)            | -7(1)           |
| C(30)  | 36(1)           | 30(1)           | 37(1)           | -2(1)           | 5(1)            | -4(1)           |
| C(31)  | 46(1)           | 32(1)           | 35(1)           | -5(1)           | 10(1)           | -3(1)           |
| C(32)  | 36(1)           | 27(1)           | 43(1)           | -7(1)           | 12(1)           | -6(1)           |
| C(33)  | 31(1)           | 33(1)           | 42(1)           | -2(1)           | 6(1)            | -2(1)           |
| C(34)  | 31(1)           | 36(1)           | 34(1)           | -3(1)           | 6(1)            | -5(1)           |
| C(35)  | 31(1)           | 35(1)           | 51(1)           | -14(1)          | 13(1)           | -7(1)           |
| C(36)  | 33(1)           | 35(1)           | 38(1)           | -14(1)          | 12(1)           | -2(1)           |
| C(37)  | 77(1)           | 47(1)           | 55(1)           | -9(1)           | 0(1)            | 17(1)           |
| C(38)  | 95(2)           | 37(1)           | 46(1)           | -6(1)           | 20(1)           | 1(1)            |
| C(39)  | 67(1)           | 44(1)           | 48(1)           | -15(1)          | 24(1)           | -20(1)          |
| C(40)  | 40(1)           | 40(1)           | 44(1)           | -13(1)          | 12(1)           | -10(1)          |
| C(41)  | 48(1)           | 39(1)           | 45(1)           | -17(1)          | 13(1)           | 1(1)            |
| C(42)  | 38(1)           | 38(1)           | 35(1)           | -2(1)           | 4(1)            | 9(1)            |
| C(43)  | 76(4)           | 79(4)           | 38(2)           | -10(2)          | 26(2)           | -19(3)          |
| N(6)   | 56(2)           | 57(2)           | 32(1)           | -10(1)          | 13(2)           | -4(2)           |
| C(43A) | 106(9)          | 82(6)           | 33(3)           | 6(3)            | 27(4)           | -5(6)           |
| N(6A)  | 79(6)           | 69(5)           | 31(2)           | -7(3)           | 9(3)            | -4(4)           |
| C(44)  | 89(2)           | 70(1)           | 47(1)           | 13(1)           | 8(1)            | -28(1)          |
| C(45)  | 67(1)           | 39(1)           | 74(1)           | -9(1)           | 25(1)           | -6(1)           |
| C(46)  | 94(2)           | 50(1)           | 82(2)           | -31(1)          | 56(1)           | -25(1)          |

**Table S6.** Hydrogen coordinates ( $\times 10^4$ ) and isotropic displacement parameters ( $\text{\AA}^2 \times 10^{-3}$ ) for **1**.

|        | x     | y     | z    | U(eq) |
|--------|-------|-------|------|-------|
| H(1)   | 5085  | 5558  | 3623 | 39    |
| H(4)   | 3130  | 6248  | 4899 | 43    |
| H(5)   | 2911  | 4891  | 5512 | 49    |
| H(6)   | 3296  | 2470  | 5639 | 53    |
| H(7)   | 4059  | 802   | 5205 | 51    |
| H(8)   | 4868  | 1249  | 4580 | 42    |
| H(12)  | 2214  | 6652  | 4212 | 42    |
| H(13)  | 1414  | 8933  | 4043 | 43    |
| H(15)  | 4057  | 10806 | 3684 | 39    |
| H(16)  | 4849  | 8551  | 3886 | 38    |
| H(17A) | 788   | 10691 | 3659 | 49    |
| H(17B) | 863   | 12521 | 3608 | 49    |
| H(19)  | -1324 | 11632 | 4749 | 66    |
| H(20)  | -387  | 12321 | 5357 | 67    |
| H(21)  | 1326  | 12719 | 5263 | 72    |
| H(22)  | 2028  | 12395 | 4559 | 60    |
| H(23A) | 3334  | 12921 | 3690 | 45    |
| H(23B) | 2303  | 13722 | 3565 | 45    |
| H(25)  | 1773  | 11137 | 2877 | 77    |
| H(26)  | 2175  | 11044 | 2116 | 94    |
| H(27)  | 3604  | 12341 | 1871 | 79    |
| H(28)  | 4519  | 13727 | 2373 | 85    |
| H(30)  | 5436  | 3220  | 3214 | 42    |
| H(31)  | 6628  | 1790  | 2850 | 45    |
| H(33)  | 7651  | 207   | 4028 | 42    |
| H(34)  | 6478  | 1708  | 4388 | 41    |
| H(35A) | 8971  | 47    | 3692 | 47    |
| H(35B) | 9476  | -496  | 3241 | 47    |
| H(37)  | 10041 | -4742 | 4055 | 72    |
| H(38)  | 8654  | -6258 | 3949 | 71    |
| H(39)  | 7281  | -5207 | 3579 | 64    |
| H(40)  | 7353  | -2640 | 3333 | 49    |
| H(41A) | 7562  | 362   | 2557 | 53    |
| H(41B) | 8517  | -728  | 2591 | 53    |
| H(43)  | 10549 | 2320  | 1893 | 77    |
| H(43A) | 9574  | 3331  | 1779 | 88    |
| H(44)  | 10422 | 4800  | 2242 | 82    |
| H(44A) | 10709 | 4424  | 2292 | 82    |
| H(45)  | 9763  | 4836  | 2950 | 72    |
| H(46)  | 8726  | 2800  | 3159 | 90    |

**Table S7.** Torsion angles [°] for **1**.

|                         |             |                          |             |
|-------------------------|-------------|--------------------------|-------------|
| C(10)-C(1)-C(2)-C(3)    | 2.19(16)    | N(1)-C(23)-C(24)-N(3)    | -153.66(15) |
| C(10)-C(1)-C(2)-C(11)   | -176.48(13) | N(1)-C(23)-C(24)-C(25)   | 29.1(2)     |
| C(1)-C(2)-C(3)-C(4)     | 170.73(14)  | N(3)-C(24)-C(25)-C(26)   | -0.4(3)     |
| C(11)-C(2)-C(3)-C(4)    | -10.6(2)    | C(23)-C(24)-C(25)-C(26)  | 176.6(2)    |
| C(1)-C(2)-C(3)-C(9)     | -3.48(15)   | C(24)-C(25)-C(26)-C(27)  | 1.6(4)      |
| C(11)-C(2)-C(3)-C(9)    | 175.17(13)  | C(25)-C(26)-C(27)-C(28)  | -1.3(4)     |
| C(2)-C(3)-C(4)-C(5)     | -178.39(15) | C(24)-N(3)-C(28)-C(27)   | 1.2(4)      |
| C(9)-C(3)-C(4)-C(5)     | -5.3(3)     | C(26)-C(27)-C(28)-N(3)   | -0.1(4)     |
| C(3)-C(4)-C(5)-C(6)     | -5.8(3)     | C(1)-C(10)-C(29)-C(34)   | 143.81(14)  |
| C(4)-C(5)-C(6)-C(7)     | 2.4(3)      | C(9)-C(10)-C(29)-C(34)   | -37.4(2)    |
| C(5)-C(6)-C(7)-C(8)     | 7.1(3)      | C(1)-C(10)-C(29)-C(30)   | -32.2(2)    |
| C(6)-C(7)-C(8)-C(9)     | -3.5(3)     | C(9)-C(10)-C(29)-C(30)   | 146.58(14)  |
| C(7)-C(8)-C(9)-C(10)    | 177.24(15)  | C(34)-C(29)-C(30)-C(31)  | -1.5(2)     |
| C(7)-C(8)-C(9)-C(3)     | -10.5(3)    | C(10)-C(29)-C(30)-C(31)  | 174.89(13)  |
| C(4)-C(3)-C(9)-C(8)     | 16.0(2)     | C(29)-C(30)-C(31)-C(32)  | 0.3(2)      |
| C(2)-C(3)-C(9)-C(8)     | -169.92(14) | C(41)-N(4)-C(32)-C(31)   | 8.9(2)      |
| C(4)-C(3)-C(9)-C(10)    | -170.51(14) | C(35)-N(4)-C(32)-C(31)   | 165.42(14)  |
| C(2)-C(3)-C(9)-C(10)    | 3.58(15)    | C(41)-N(4)-C(32)-C(33)   | -171.11(14) |
| C(2)-C(1)-C(10)-C(9)    | 0.12(16)    | C(35)-N(4)-C(32)-C(33)   | -14.6(2)    |
| C(2)-C(1)-C(10)-C(29)   | 179.15(13)  | C(30)-C(31)-C(32)-N(4)   | -178.29(14) |
| C(8)-C(9)-C(10)-C(1)    | 171.19(14)  | C(30)-C(31)-C(32)-C(33)  | 1.7(2)      |
| C(3)-C(9)-C(10)-C(1)    | -2.25(15)   | N(4)-C(32)-C(33)-C(34)   | 177.33(13)  |
| C(8)-C(9)-C(10)-C(29)   | -7.8(2)     | C(31)-C(32)-C(33)-C(34)  | -2.7(2)     |
| C(3)-C(9)-C(10)-C(29)   | 178.77(13)  | C(32)-C(33)-C(34)-C(29)  | 1.7(2)      |
| C(1)-C(2)-C(11)-C(16)   | -44.2(2)    | C(30)-C(29)-C(34)-C(33)  | 0.5(2)      |
| C(3)-C(2)-C(11)-C(16)   | 137.37(15)  | C(10)-C(29)-C(34)-C(33)  | -175.70(13) |
| C(1)-C(2)-C(11)-C(12)   | 132.26(16)  | C(32)-N(4)-C(35)-C(36)   | 96.16(16)   |
| C(3)-C(2)-C(11)-C(12)   | -46.1(2)    | C(41)-N(4)-C(35)-C(36)   | -105.94(15) |
| C(16)-C(11)-C(12)-C(13) | -0.2(2)     | C(37)-N(5)-C(36)-C(40)   | -0.8(2)     |
| C(2)-C(11)-C(12)-C(13)  | -176.85(13) | C(37)-N(5)-C(36)-C(35)   | 179.18(15)  |
| C(11)-C(12)-C(13)-C(14) | 1.1(2)      | N(4)-C(35)-C(36)-N(5)    | 176.68(13)  |
| C(23)-N(1)-C(14)-C(13)  | -173.56(14) | N(4)-C(35)-C(36)-C(40)   | -3.4(2)     |
| C(17)-N(1)-C(14)-C(13)  | -1.7(2)     | C(36)-N(5)-C(37)-C(38)   | 0.3(3)      |
| C(23)-N(1)-C(14)-C(15)  | 7.1(2)      | N(5)-C(37)-C(38)-C(39)   | 0.3(3)      |
| C(17)-N(1)-C(14)-C(15)  | 178.97(14)  | C(37)-C(38)-C(39)-C(40)  | -0.3(3)     |
| C(12)-C(13)-C(14)-N(1)  | -179.79(14) | C(38)-C(39)-C(40)-C(36)  | -0.1(2)     |
| C(12)-C(13)-C(14)-C(15) | -0.4(2)     | N(5)-C(36)-C(40)-C(39)   | 0.7(2)      |
| N(1)-C(14)-C(15)-C(16)  | 178.24(13)  | C(35)-C(36)-C(40)-C(39)  | -179.22(14) |
| C(13)-C(14)-C(15)-C(16) | -1.1(2)     | C(32)-N(4)-C(41)-C(42)   | 83.40(18)   |
| C(14)-C(15)-C(16)-C(11) | 2.1(2)      | C(35)-N(4)-C(41)-C(42)   | -74.28(17)  |
| C(12)-C(11)-C(16)-C(15) | -1.4(2)     | N(4)-C(41)-C(42)-N(6A)   | 178.8(9)    |
| C(2)-C(11)-C(16)-C(15)  | 175.25(13)  | N(4)-C(41)-C(42)-C(46)   | -19.7(3)    |
| C(14)-N(1)-C(17)-C(18)  | 77.07(19)   | N(4)-C(41)-C(42)-N(6)    | 147.9(4)    |
| C(23)-N(1)-C(17)-C(18)  | -110.90(16) | C(44)-C(43)-N(6)-C(42)   | -6.6(7)     |
| C(19)-N(2)-C(18)-C(22)  | 0.7(3)      | C(46)-C(42)-N(6)-C(43)   | -8.4(5)     |
| C(19)-N(2)-C(18)-C(17)  | -178.29(17) | C(41)-C(42)-N(6)-C(43)   | -176.2(3)   |
| N(1)-C(17)-C(18)-N(2)   | -165.71(15) | C(46)-C(42)-N(6A)-C(43A) | 12.1(11)    |
| N(1)-C(17)-C(18)-C(22)  | 15.3(2)     | C(41)-C(42)-N(6A)-C(43A) | 174.8(6)    |
| C(18)-N(2)-C(19)-C(20)  | -0.5(3)     | C(44)-C(43A)-N(6A)-C(42) | 15.8(13)    |
| N(2)-C(19)-C(20)-C(21)  | 0.2(4)      | N(6A)-C(43A)-C(44)-C(45) | -34.6(14)   |
| C(19)-C(20)-C(21)-C(22) | 0.0(4)      | N(6)-C(43)-C(44)-C(45)   | 17.7(8)     |
| N(2)-C(18)-C(22)-C(21)  | -0.5(3)     | C(43A)-C(44)-C(45)-C(46) | 25.3(9)     |
| C(17)-C(18)-C(22)-C(21) | 178.37(19)  | C(43)-C(44)-C(45)-C(46)  | -12.9(6)    |
| C(20)-C(21)-C(22)-C(18) | 0.2(3)      | N(6A)-C(42)-C(46)-C(45)  | -19.1(9)    |
| C(14)-N(1)-C(23)-C(24)  | 74.95(18)   | N(6)-C(42)-C(46)-C(45)   | 12.9(5)     |
| C(17)-N(1)-C(23)-C(24)  | -97.00(16)  | C(41)-C(42)-C(46)-C(45)  | 179.5(2)    |
| C(28)-N(3)-C(24)-C(25)  | -0.9(3)     | C(44)-C(45)-C(46)-C(42)  | -1.4(4)     |
| C(28)-N(3)-C(24)-C(23)  | -178.16(18) |                          |             |

## X-Ray crystallographic data for 2

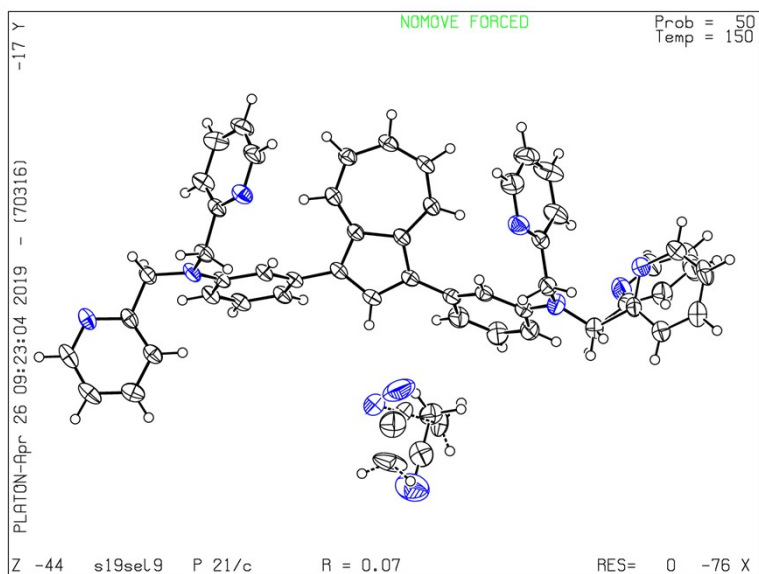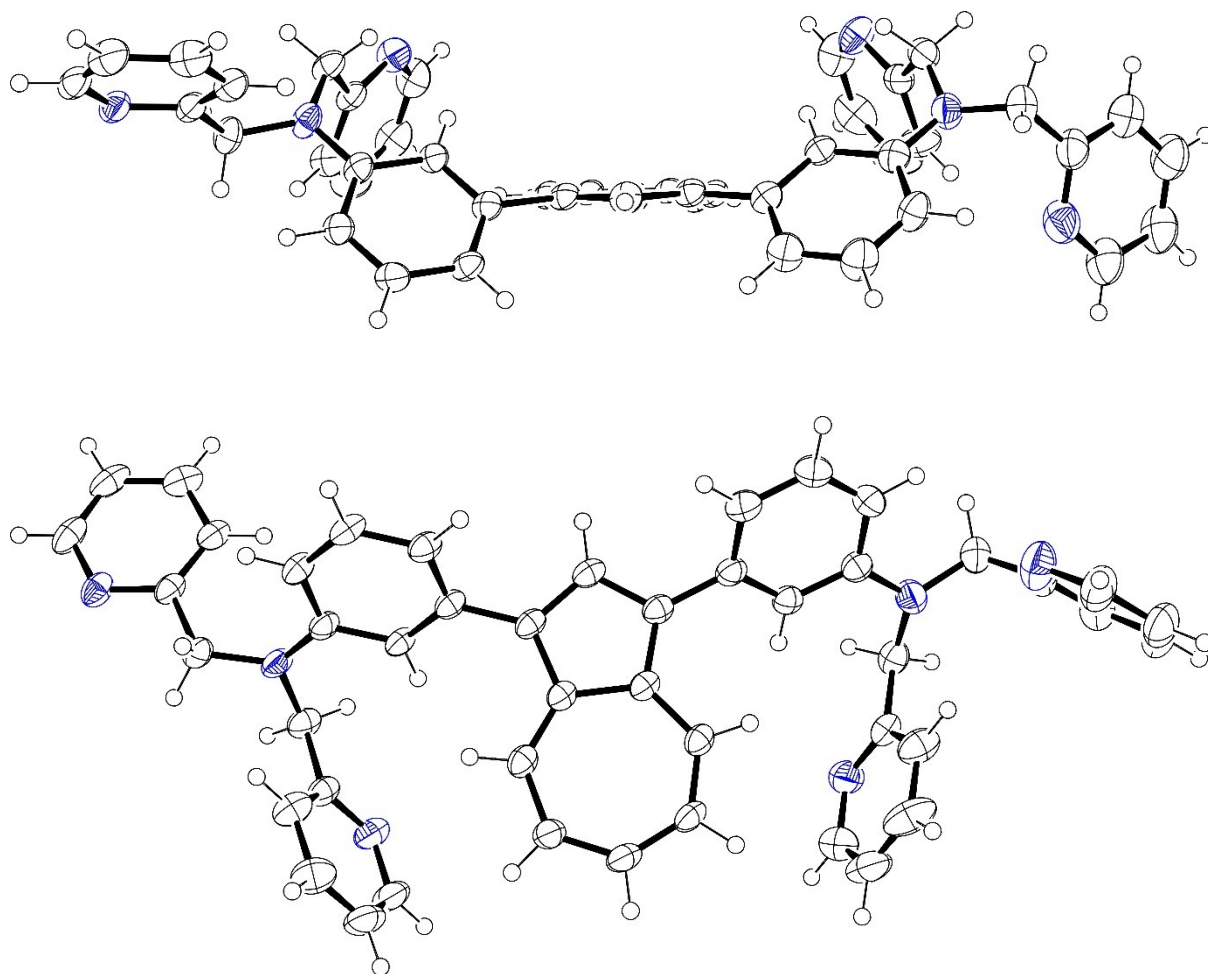

**Table S8.** Crystal data and structure refinement for **2**.

|                                   |                                                |                  |
|-----------------------------------|------------------------------------------------|------------------|
| Identification code               | s19se19                                        |                  |
| Empirical formula                 | C <sub>48</sub> H <sub>41</sub> N <sub>7</sub> |                  |
| Formula weight                    | 715.88                                         |                  |
| Temperature                       | 150.00(10) K                                   |                  |
| Wavelength                        | 1.54184 Å                                      |                  |
| Crystal system                    | Monoclinic                                     |                  |
| Space group                       | P2 <sub>1</sub> /c                             |                  |
| Unit cell dimensions              | a = 13.6047(3) Å                               | α = 90°.         |
|                                   | b = 9.8218(2) Å                                | β = 100.398(3)°. |
|                                   | c = 29.3670(11) Å                              | γ = 90°.         |
| Volume                            | 3859.65(19) Å <sup>3</sup>                     |                  |
| Z                                 | 4                                              |                  |
| Density (calculated)              | 1.232 Mg/m <sup>3</sup>                        |                  |
| Absorption coefficient            | 0.575 mm <sup>-1</sup>                         |                  |
| F(000)                            | 1512                                           |                  |
| Crystal size                      | 0.336 x 0.172 x 0.055 mm <sup>3</sup>          |                  |
| Theta range for data collection   | 4.078 to 68.647°.                              |                  |
| Index ranges                      | -16 ≤ h ≤ 16, -11 ≤ k ≤ 11, -33 ≤ l ≤ 35       |                  |
| Reflections collected             | 40045                                          |                  |
| Independent reflections           | 7082 [R(int) = 0.0575]                         |                  |
| Completeness to theta = 67.684°   | 99.8 %                                         |                  |
| Absorption correction             | Semi-empirical from equivalents                |                  |
| Max. and min. transmission        | 1.00000 and 0.68222                            |                  |
| Refinement method                 | Full-matrix least-squares on F <sup>2</sup>    |                  |
| Data / restraints / parameters    | 7082 / 18 / 608                                |                  |
| Goodness-of-fit on F <sup>2</sup> | 1.121                                          |                  |
| Final R indices [I > 2σ(I)]       | R1 = 0.0688, wR2 = 0.1669                      |                  |
| R indices (all data)              | R1 = 0.0880, wR2 = 0.1780                      |                  |
| Extinction coefficient            | n/a                                            |                  |
| Largest diff. peak and hole       | 0.364 and -0.222 e.Å <sup>-3</sup>             |                  |

**Table S9.** Atomic coordinates ( $\times 10^4$ ) and equivalent isotropic displacement parameters ( $\text{\AA}^2 \times 10^3$ ) for **2**.  $U(\text{eq})$  is defined as one third of the trace of the orthogonalized  $U^{ij}$  tensor.

|        | x        | y        | z       | U(eq) |
|--------|----------|----------|---------|-------|
| N(1)   | -279(2)  | 4345(2)  | 1758(1) | 36(1) |
| N(2)   | 1334(2)  | 7317(3)  | 1772(1) | 42(1) |
| N(3)   | -2870(2) | 3487(2)  | 1226(1) | 38(1) |
| N(4)   | 6352(2)  | 4181(3)  | 4924(1) | 42(1) |
| N(5)   | 6252(2)  | 7291(3)  | 4237(1) | 48(1) |
| C(1)   | 3174(2)  | 2598(3)  | 3257(1) | 33(1) |
| C(2)   | 2833(2)  | 3142(3)  | 2818(1) | 29(1) |
| C(3)   | 3582(2)  | 4028(3)  | 2714(1) | 28(1) |
| C(4)   | 3568(2)  | 4698(3)  | 2300(1) | 32(1) |
| C(5)   | 4302(2)  | 5495(3)  | 2156(1) | 34(1) |
| C(6)   | 5253(2)  | 5795(3)  | 2397(1) | 36(1) |
| C(7)   | 5719(2)  | 5403(3)  | 2835(1) | 34(1) |
| C(8)   | 5347(2)  | 4608(3)  | 3160(1) | 31(1) |
| C(9)   | 4413(2)  | 4000(3)  | 3122(1) | 28(1) |
| C(10)  | 4115(2)  | 3122(3)  | 3451(1) | 30(1) |
| C(11)  | 1903(2)  | 2747(3)  | 2503(1) | 30(1) |
| C(12)  | 1705(2)  | 1372(3)  | 2416(1) | 33(1) |
| C(13)  | 847(2)   | 996(3)   | 2108(1) | 34(1) |
| C(14)  | 191(2)   | 1960(3)  | 1890(1) | 34(1) |
| C(15)  | 374(2)   | 3355(3)  | 1973(1) | 31(1) |
| C(16)  | 1240(2)  | 3727(3)  | 2287(1) | 30(1) |
| C(17)  | -19(2)   | 5773(3)  | 1817(1) | 36(1) |
| C(18)  | 845(2)   | 6210(3)  | 1585(1) | 33(1) |
| C(19)  | 1094(2)  | 5535(3)  | 1211(1) | 45(1) |
| C(20)  | 1887(3)  | 6013(4)  | 1019(1) | 54(1) |
| C(21)  | 2397(2)  | 7148(4)  | 1207(1) | 52(1) |
| C(22)  | 2098(2)  | 7764(3)  | 1577(1) | 48(1) |
| C(23)  | -1111(2) | 3975(3)  | 1394(1) | 37(1) |
| C(24)  | -2052(2) | 3530(3)  | 1563(1) | 33(1) |
| C(25)  | -2070(2) | 3172(3)  | 2013(1) | 36(1) |
| C(26)  | -2969(2) | 2768(3)  | 2132(1) | 46(1) |
| C(27)  | -3815(2) | 2721(3)  | 1790(1) | 47(1) |
| C(28)  | -3725(2) | 3078(3)  | 1346(1) | 43(1) |
| C(29)  | 4718(2)  | 2695(3)  | 3898(1) | 32(1) |
| C(30)  | 4798(2)  | 1316(3)  | 4006(1) | 45(1) |
| C(31)  | 5385(3)  | 900(3)   | 4414(1) | 51(1) |
| C(32)  | 5889(2)  | 1829(3)  | 4723(1) | 43(1) |
| C(33)  | 5825(2)  | 3234(3)  | 4625(1) | 34(1) |
| C(34)  | 5223(2)  | 3638(3)  | 4210(1) | 31(1) |
| C(35)  | 6195(2)  | 5617(3)  | 4828(1) | 38(1) |
| C(36)  | 6664(2)  | 6162(3)  | 4437(1) | 34(1) |
| C(37)  | 7472(2)  | 5541(3)  | 4297(1) | 49(1) |
| C(38)  | 7867(3)  | 6121(4)  | 3941(2) | 63(1) |
| C(39)  | 7462(3)  | 7286(4)  | 3737(1) | 59(1) |
| C(40)  | 6656(3)  | 7836(4)  | 3895(1) | 60(1) |
| C(41)  | 6805(2)  | 3792(4)  | 5392(1) | 47(1) |
| C(42)  | 7870(5)  | 3576(8)  | 5439(2) | 50(2) |
| C(43)  | 8535(5)  | 4426(8)  | 5706(3) | 57(2) |
| C(44)  | 9560(5)  | 4247(9)  | 5725(3) | 64(2) |
| C(45)  | 9866(5)  | 3215(9)  | 5476(3) | 63(2) |
| C(46)  | 9146(5)  | 2360(10) | 5209(3) | 61(2) |
| N(6)   | 8162(4)  | 2559(7)  | 5189(2) | 60(2) |
| C(42A) | 7735(4)  | 4640(6)  | 5607(2) | 33(1) |
| C(43A) | 7815(4)  | 5075(6)  | 6062(2) | 38(1) |
| C(44A) | 8657(5)  | 5757(6)  | 6270(2) | 45(2) |

|        |          |          |         |        |
|--------|----------|----------|---------|--------|
| C(45A) | 9389(5)  | 6022(7)  | 6013(2) | 50(2)  |
| C(46A) | 9256(5)  | 5582(8)  | 5565(2) | 54(2)  |
| N(6A)  | 8446(4)  | 4886(6)  | 5358(2) | 49(1)  |
| N(7)   | 1619(8)  | 2360(9)  | 4132(3) | 38(2)  |
| C(51)  | 2166(9)  | 1797(9)  | 4381(4) | 29(2)  |
| C(52)  | 2850(20) | 1010(30) | 4701(8) | 42(6)  |
| N(7A)  | 1332(7)  | 1086(10) | 5006(4) | 103(3) |
| C(51A) | 2012(6)  | 1109(8)  | 4807(3) | 60(2)  |
| C(52A) | 2806(12) | 1166(16) | 4563(4) | 49(3)  |
| N(8)   | 1036(15) | 9160(20) | 4784(5) | 101(6) |
| C(55)  | 554(14)  | 8310(20) | 4944(6) | 69(4)  |
| C(56)  | 108(13)  | 7309(18) | 5147(6) | 79(6)  |

---

**Table S10.** Bond lengths [Å] for **2**.

|              |          |               |           |
|--------------|----------|---------------|-----------|
| N(1)-C(15)   | 1.389(3) | C(29)-C(30)   | 1.391(4)  |
| N(1)-C(17)   | 1.449(4) | C(29)-C(34)   | 1.395(4)  |
| N(1)-C(23)   | 1.457(3) | C(30)-C(31)   | 1.378(4)  |
| N(2)-C(18)   | 1.339(4) | C(30)-H(30)   | 0.9500    |
| N(2)-C(22)   | 1.347(4) | C(31)-C(32)   | 1.379(5)  |
| N(3)-C(28)   | 1.337(4) | C(31)-H(31)   | 0.9500    |
| N(3)-C(24)   | 1.350(3) | C(32)-C(33)   | 1.409(4)  |
| N(4)-C(33)   | 1.386(4) | C(32)-H(32)   | 0.9500    |
| N(4)-C(35)   | 1.446(4) | C(32)-H(32A)  | 0.9500    |
| N(4)-C(41)   | 1.454(4) | C(33)-C(34)   | 1.397(4)  |
| N(5)-C(36)   | 1.331(4) | C(34)-H(34)   | 0.9500    |
| N(5)-C(40)   | 1.340(4) | C(35)-C(36)   | 1.512(4)  |
| C(1)-C(2)    | 1.395(4) | C(35)-H(35A)  | 0.9900    |
| C(1)-C(10)   | 1.402(4) | C(35)-H(35B)  | 0.9900    |
| C(1)-H(1)    | 0.9500   | C(36)-C(37)   | 1.383(4)  |
| C(2)-C(3)    | 1.415(3) | C(37)-C(38)   | 1.381(5)  |
| C(2)-C(11)   | 1.478(4) | C(37)-H(37)   | 0.9500    |
| C(3)-C(4)    | 1.380(4) | C(38)-C(39)   | 1.361(6)  |
| C(3)-C(9)    | 1.492(4) | C(38)-H(38)   | 0.9500    |
| C(4)-C(5)    | 1.392(4) | C(39)-C(40)   | 1.376(5)  |
| C(4)-H(4)    | 0.9500   | C(39)-H(39)   | 0.9500    |
| C(5)-C(6)    | 1.389(4) | C(40)-H(40)   | 0.9500    |
| C(5)-H(5)    | 0.9500   | C(41)-C(42)   | 1.446(7)  |
| C(6)-C(7)    | 1.383(4) | C(41)-C(42A)  | 1.551(6)  |
| C(6)-H(6)    | 0.9500   | C(41)-H(41A)  | 0.9900    |
| C(7)-C(8)    | 1.396(4) | C(41)-H(41B)  | 0.9900    |
| C(7)-H(7)    | 0.9500   | C(41)-H(41C)  | 0.9900    |
| C(8)-C(9)    | 1.391(3) | C(41)-H(41D)  | 0.9900    |
| C(8)-H(8)    | 0.9500   | C(42)-N(6)    | 1.341(9)  |
| C(9)-C(10)   | 1.407(4) | C(42)-C(43)   | 1.370(10) |
| C(10)-C(29)  | 1.477(4) | C(43)-C(44)   | 1.397(10) |
| C(11)-C(16)  | 1.392(4) | C(43)-H(43)   | 0.9500    |
| C(11)-C(12)  | 1.392(4) | C(44)-C(45)   | 1.359(12) |
| C(12)-C(13)  | 1.391(4) | C(44)-H(44)   | 0.9500    |
| C(12)-H(12)  | 0.9500   | C(45)-C(46)   | 1.414(11) |
| C(13)-C(14)  | 1.377(4) | C(45)-H(45)   | 0.9500    |
| C(13)-H(13)  | 0.9500   | C(46)-N(6)    | 1.343(9)  |
| C(14)-C(15)  | 1.406(4) | C(46)-H(46)   | 0.9500    |
| C(14)-H(14)  | 0.9500   | C(42A)-N(6A)  | 1.337(8)  |
| C(15)-C(16)  | 1.408(4) | C(42A)-C(43A) | 1.388(8)  |
| C(16)-H(16)  | 0.9500   | C(43A)-C(44A) | 1.371(8)  |
| C(17)-C(18)  | 1.522(4) | C(43A)-H(43A) | 0.9500    |
| C(17)-H(17A) | 0.9900   | C(44A)-C(45A) | 1.381(10) |
| C(17)-H(17B) | 0.9900   | C(44A)-H(44A) | 0.9500    |
| C(18)-C(19)  | 1.378(4) | C(45A)-C(46A) | 1.366(10) |
| C(19)-C(20)  | 1.387(4) | C(45A)-H(45A) | 0.9500    |
| C(19)-H(19)  | 0.9500   | C(46A)-N(6A)  | 1.344(8)  |
| C(20)-C(21)  | 1.376(5) | C(46A)-H(46A) | 0.9500    |
| C(20)-H(20)  | 0.9500   | N(7)-C(51)    | 1.094(14) |
| C(21)-C(22)  | 1.368(5) | C(51)-C(52)   | 1.43(2)   |
| C(21)-H(21)  | 0.9500   | C(52)-H(52A)  | 0.9800    |
| C(22)-H(22)  | 0.9500   | C(52)-H(52B)  | 0.9800    |
| C(23)-C(24)  | 1.519(4) | C(52)-H(52C)  | 0.9800    |
| C(23)-H(23A) | 0.9900   | N(7A)-C(51A)  | 1.180(11) |
| C(23)-H(23B) | 0.9900   | C(51A)-C(52A) | 1.402(16) |
| C(24)-C(25)  | 1.371(4) | C(52A)-H(52D) | 0.9800    |
| C(25)-C(26)  | 1.389(4) | C(52A)-H(52E) | 0.9800    |
| C(25)-H(25)  | 0.9500   | C(52A)-H(52F) | 0.9800    |
| C(26)-C(27)  | 1.386(5) | N(8)-C(55)    | 1.20(2)   |
| C(26)-H(26)  | 0.9500   | C(55)-C(56)   | 1.35(2)   |
| C(27)-C(28)  | 1.377(5) | C(56)-H(56A)  | 0.9800    |
| C(27)-H(27)  | 0.9500   | C(56)-H(56B)  | 0.9800    |
| C(28)-H(28)  | 0.9500   | C(56)-H(56C)  | 0.9800    |



**Table S11.** Bond angles [°] for **2**.

|                   |          |                     |          |
|-------------------|----------|---------------------|----------|
| C(15)-N(1)-C(17)  | 120.0(2) | N(1)-C(17)-H(17A)   | 108.7    |
| C(15)-N(1)-C(23)  | 120.5(2) | C(18)-C(17)-H(17A)  | 108.7    |
| C(17)-N(1)-C(23)  | 118.1(2) | N(1)-C(17)-H(17B)   | 108.7    |
| C(18)-N(2)-C(22)  | 117.2(3) | C(18)-C(17)-H(17B)  | 108.7    |
| C(28)-N(3)-C(24)  | 117.2(3) | H(17A)-C(17)-H(17B) | 107.6    |
| C(33)-N(4)-C(35)  | 119.4(2) | N(2)-C(18)-C(19)    | 122.7(3) |
| C(33)-N(4)-C(41)  | 120.3(3) | N(2)-C(18)-C(17)    | 114.4(3) |
| C(35)-N(4)-C(41)  | 117.5(3) | C(19)-C(18)-C(17)   | 122.8(3) |
| C(36)-N(5)-C(40)  | 117.8(3) | C(18)-C(19)-C(20)   | 118.9(3) |
| C(2)-C(1)-C(10)   | 111.2(2) | C(18)-C(19)-H(19)   | 120.6    |
| C(2)-C(1)-H(1)    | 124.4    | C(20)-C(19)-H(19)   | 120.6    |
| C(10)-C(1)-H(1)   | 124.4    | C(21)-C(20)-C(19)   | 118.9(3) |
| C(1)-C(2)-C(3)    | 107.7(2) | C(21)-C(20)-H(20)   | 120.6    |
| C(1)-C(2)-C(11)   | 125.6(2) | C(19)-C(20)-H(20)   | 120.6    |
| C(3)-C(2)-C(11)   | 126.5(2) | C(22)-C(21)-C(20)   | 118.6(3) |
| C(4)-C(3)-C(2)    | 126.0(2) | C(22)-C(21)-H(21)   | 120.7    |
| C(4)-C(3)-C(9)    | 127.2(2) | C(20)-C(21)-H(21)   | 120.7    |
| C(2)-C(3)-C(9)    | 106.6(2) | N(2)-C(22)-C(21)    | 123.7(3) |
| C(3)-C(4)-C(5)    | 129.7(3) | N(2)-C(22)-H(22)    | 118.1    |
| C(3)-C(4)-H(4)    | 115.1    | C(21)-C(22)-H(22)   | 118.1    |
| C(5)-C(4)-H(4)    | 115.1    | N(1)-C(23)-C(24)    | 114.8(2) |
| C(6)-C(5)-C(4)    | 128.1(3) | N(1)-C(23)-H(23A)   | 108.6    |
| C(6)-C(5)-H(5)    | 115.9    | C(24)-C(23)-H(23A)  | 108.6    |
| C(4)-C(5)-H(5)    | 115.9    | N(1)-C(23)-H(23B)   | 108.6    |
| C(7)-C(6)-C(5)    | 130.0(3) | C(24)-C(23)-H(23B)  | 108.6    |
| C(7)-C(6)-H(6)    | 115.0    | H(23A)-C(23)-H(23B) | 107.5    |
| C(5)-C(6)-H(6)    | 115.0    | N(3)-C(24)-C(25)    | 122.8(3) |
| C(6)-C(7)-C(8)    | 129.0(2) | N(3)-C(24)-C(23)    | 113.6(3) |
| C(6)-C(7)-H(7)    | 115.5    | C(25)-C(24)-C(23)   | 123.5(2) |
| C(8)-C(7)-H(7)    | 115.5    | C(24)-C(25)-C(26)   | 119.1(3) |
| C(9)-C(8)-C(7)    | 128.7(3) | C(24)-C(25)-H(25)   | 120.5    |
| C(9)-C(8)-H(8)    | 115.7    | C(26)-C(25)-H(25)   | 120.5    |
| C(7)-C(8)-H(8)    | 115.7    | C(27)-C(26)-C(25)   | 118.8(3) |
| C(8)-C(9)-C(10)   | 125.5(2) | C(27)-C(26)-H(26)   | 120.6    |
| C(8)-C(9)-C(3)    | 127.2(2) | C(25)-C(26)-H(26)   | 120.6    |
| C(10)-C(9)-C(3)   | 107.0(2) | C(28)-C(27)-C(26)   | 118.3(3) |
| C(1)-C(10)-C(9)   | 107.5(2) | C(28)-C(27)-H(27)   | 120.9    |
| C(1)-C(10)-C(29)  | 125.2(2) | C(26)-C(27)-H(27)   | 120.9    |
| C(9)-C(10)-C(29)  | 126.9(2) | N(3)-C(28)-C(27)    | 123.8(3) |
| C(16)-C(11)-C(12) | 119.9(2) | N(3)-C(28)-H(28)    | 118.1    |
| C(16)-C(11)-C(2)  | 121.0(2) | C(27)-C(28)-H(28)   | 118.1    |
| C(12)-C(11)-C(2)  | 119.1(2) | C(30)-C(29)-C(34)   | 119.2(3) |
| C(13)-C(12)-C(11) | 119.3(3) | C(30)-C(29)-C(10)   | 119.2(3) |
| C(13)-C(12)-H(12) | 120.3    | C(34)-C(29)-C(10)   | 121.7(2) |
| C(11)-C(12)-H(12) | 120.3    | C(31)-C(30)-C(29)   | 119.8(3) |
| C(14)-C(13)-C(12) | 121.1(3) | C(31)-C(30)-H(30)   | 120.1    |
| C(14)-C(13)-H(13) | 119.5    | C(29)-C(30)-H(30)   | 120.1    |
| C(12)-C(13)-H(13) | 119.5    | C(30)-C(31)-C(32)   | 121.2(3) |
| C(13)-C(14)-C(15) | 120.7(2) | C(30)-C(31)-H(31)   | 119.4    |
| C(13)-C(14)-H(14) | 119.7    | C(32)-C(31)-H(31)   | 119.4    |
| C(15)-C(14)-H(14) | 119.7    | C(31)-C(32)-C(33)   | 120.6(3) |
| N(1)-C(15)-C(14)  | 121.7(2) | C(31)-C(32)-H(32)   | 119.7    |
| N(1)-C(15)-C(16)  | 120.4(2) | C(33)-C(32)-H(32)   | 119.7    |
| C(14)-C(15)-C(16) | 117.9(2) | C(31)-C(32)-H(32A)  | 119.7    |
| C(11)-C(16)-C(15) | 121.1(2) | C(33)-C(32)-H(32A)  | 119.7    |
| C(11)-C(16)-H(16) | 119.5    | N(4)-C(33)-C(34)    | 121.1(3) |
| C(15)-C(16)-H(16) | 119.5    | N(4)-C(33)-C(32)    | 121.5(3) |
| N(1)-C(17)-C(18)  | 114.3(2) | C(34)-C(33)-C(32)   | 117.5(3) |

|                     |          |                      |           |
|---------------------|----------|----------------------|-----------|
| C(29)-C(34)-C(33)   | 121.8(3) | C(44)-C(45)-C(46)    | 119.5(7)  |
| C(29)-C(34)-H(34)   | 119.1    | C(44)-C(45)-H(45)    | 120.2     |
| C(33)-C(34)-H(34)   | 119.1    | C(46)-C(45)-H(45)    | 120.2     |
| N(4)-C(35)-C(36)    | 115.1(2) | N(6)-C(46)-C(45)     | 121.5(8)  |
| N(4)-C(35)-H(35A)   | 108.5    | N(6)-C(46)-H(46)     | 119.3     |
| C(36)-C(35)-H(35A)  | 108.5    | C(45)-C(46)-H(46)    | 119.3     |
| N(4)-C(35)-H(35B)   | 108.5    | C(42)-N(6)-C(46)     | 118.4(7)  |
| C(36)-C(35)-H(35B)  | 108.5    | N(6A)-C(42A)-C(43A)  | 122.3(5)  |
| H(35A)-C(35)-H(35B) | 107.5    | N(6A)-C(42A)-C(41)   | 119.4(5)  |
| N(5)-C(36)-C(37)    | 122.1(3) | C(43A)-C(42A)-C(41)  | 118.3(5)  |
| N(5)-C(36)-C(35)    | 115.4(2) | C(44A)-C(43A)-C(42A) | 119.6(6)  |
| C(37)-C(36)-C(35)   | 122.6(3) | C(44A)-C(43A)-H(43A) | 120.2     |
| C(38)-C(37)-C(36)   | 118.8(3) | C(42A)-C(43A)-H(43A) | 120.2     |
| C(38)-C(37)-H(37)   | 120.6    | C(43A)-C(44A)-C(45A) | 118.4(6)  |
| C(36)-C(37)-H(37)   | 120.6    | C(43A)-C(44A)-H(44A) | 120.8     |
| C(39)-C(38)-C(37)   | 119.8(3) | C(45A)-C(44A)-H(44A) | 120.8     |
| C(39)-C(38)-H(38)   | 120.1    | C(46A)-C(45A)-C(44A) | 119.0(6)  |
| C(37)-C(38)-H(38)   | 120.1    | C(46A)-C(45A)-H(45A) | 120.5     |
| C(38)-C(39)-C(40)   | 117.8(3) | C(44A)-C(45A)-H(45A) | 120.5     |
| C(38)-C(39)-H(39)   | 121.1    | N(6A)-C(46A)-C(45A)  | 123.5(6)  |
| C(40)-C(39)-H(39)   | 121.1    | N(6A)-C(46A)-H(46A)  | 118.3     |
| N(5)-C(40)-C(39)    | 123.7(4) | C(45A)-C(46A)-H(46A) | 118.3     |
| N(5)-C(40)-H(40)    | 118.1    | C(42A)-N(6A)-C(46A)  | 117.3(6)  |
| C(39)-C(40)-H(40)   | 118.1    | N(7)-C(51)-C(52)     | 177.4(17) |
| C(42)-C(41)-N(4)    | 111.9(4) | C(51)-C(52)-H(52A)   | 109.5     |
| N(4)-C(41)-C(42A)   | 114.8(3) | C(51)-C(52)-H(52B)   | 109.5     |
| C(42)-C(41)-H(41A)  | 109.2    | H(52A)-C(52)-H(52B)  | 109.5     |
| N(4)-C(41)-H(41A)   | 109.2    | C(51)-C(52)-H(52C)   | 109.5     |
| C(42)-C(41)-H(41B)  | 109.2    | H(52A)-C(52)-H(52C)  | 109.5     |
| N(4)-C(41)-H(41B)   | 109.2    | H(52B)-C(52)-H(52C)  | 109.5     |
| H(41A)-C(41)-H(41B) | 107.9    | N(7A)-C(51A)-C(52A)  | 178.4(11) |
| N(4)-C(41)-H(41C)   | 108.6    | C(51A)-C(52A)-H(52D) | 109.5     |
| C(42A)-C(41)-H(41C) | 108.6    | C(51A)-C(52A)-H(52E) | 109.5     |
| N(4)-C(41)-H(41D)   | 108.6    | H(52D)-C(52A)-H(52E) | 109.5     |
| C(42A)-C(41)-H(41D) | 108.6    | C(51A)-C(52A)-H(52F) | 109.5     |
| H(41C)-C(41)-H(41D) | 107.5    | H(52D)-C(52A)-H(52F) | 109.5     |
| N(6)-C(42)-C(43)    | 122.5(7) | H(52E)-C(52A)-H(52F) | 109.5     |
| N(6)-C(42)-C(41)    | 116.7(6) | N(8)-C(55)-C(56)     | 174(2)    |
| C(43)-C(42)-C(41)   | 120.8(7) | C(55)-C(56)-H(56A)   | 109.5     |
| C(42)-C(43)-C(44)   | 119.8(8) | C(55)-C(56)-H(56B)   | 109.5     |
| C(42)-C(43)-H(43)   | 120.1    | H(56A)-C(56)-H(56B)  | 109.5     |
| C(44)-C(43)-H(43)   | 120.1    | C(55)-C(56)-H(56C)   | 109.5     |
| C(45)-C(44)-C(43)   | 118.2(7) | H(56A)-C(56)-H(56C)  | 109.5     |
| C(45)-C(44)-H(44)   | 120.9    | H(56B)-C(56)-H(56C)  | 109.5     |
| C(43)-C(44)-H(44)   | 120.9    |                      |           |

**Table S12.** Anisotropic displacement parameters ( $\text{\AA}^2 \times 10^3$ ) for **2**. The anisotropic displacement factor exponent takes the form:  $-2\pi^2 [ h^2 a^*2U^{11} + \dots + 2 h k a^* b^* U^{12} ]$

|        | U <sup>11</sup> | U <sup>22</sup> | U <sup>33</sup> | U <sup>23</sup> | U <sup>13</sup> | U <sup>12</sup> |
|--------|-----------------|-----------------|-----------------|-----------------|-----------------|-----------------|
| N(1)   | 22(1)           | 32(1)           | 54(2)           | 6(1)            | 3(1)            | -6(1)           |
| N(2)   | 35(1)           | 36(1)           | 56(2)           | 1(1)            | 10(1)           | -7(1)           |
| N(3)   | 25(1)           | 32(1)           | 54(2)           | -4(1)           | 3(1)            | 1(1)            |
| N(4)   | 45(1)           | 40(1)           | 37(1)           | 2(1)            | -1(1)           | 0(1)            |
| N(5)   | 36(1)           | 50(2)           | 57(2)           | 13(1)           | 11(1)           | 4(1)            |
| C(1)   | 26(1)           | 33(1)           | 42(2)           | 0(1)            | 11(1)           | -5(1)           |
| C(2)   | 21(1)           | 27(1)           | 41(2)           | -3(1)           | 9(1)            | -1(1)           |
| C(3)   | 22(1)           | 24(1)           | 38(1)           | -1(1)           | 7(1)            | 2(1)            |
| C(4)   | 23(1)           | 30(1)           | 41(2)           | -2(1)           | 5(1)            | 2(1)            |
| C(5)   | 30(1)           | 32(1)           | 42(2)           | 5(1)            | 7(1)            | -2(1)           |
| C(6)   | 29(1)           | 32(1)           | 50(2)           | 4(1)            | 12(1)           | -6(1)           |
| C(7)   | 21(1)           | 33(1)           | 49(2)           | 0(1)            | 8(1)            | -5(1)           |
| C(8)   | 23(1)           | 28(1)           | 41(2)           | -2(1)           | 4(1)            | 1(1)            |
| C(9)   | 22(1)           | 24(1)           | 39(2)           | -2(1)           | 8(1)            | 2(1)            |
| C(10)  | 25(1)           | 29(1)           | 38(2)           | 0(1)            | 9(1)            | 0(1)            |
| C(11)  | 21(1)           | 32(1)           | 37(2)           | -2(1)           | 9(1)            | -3(1)           |
| C(12)  | 24(1)           | 27(1)           | 47(2)           | 1(1)            | 9(1)            | 1(1)            |
| C(13)  | 28(1)           | 27(1)           | 50(2)           | -6(1)           | 13(1)           | -6(1)           |
| C(14)  | 24(1)           | 34(1)           | 45(2)           | -4(1)           | 7(1)            | -5(1)           |
| C(15)  | 20(1)           | 33(1)           | 40(2)           | 2(1)            | 8(1)            | -4(1)           |
| C(16)  | 22(1)           | 27(1)           | 41(2)           | -2(1)           | 7(1)            | -4(1)           |
| C(17)  | 24(1)           | 34(2)           | 52(2)           | 4(1)            | 11(1)           | 2(1)            |
| C(18)  | 23(1)           | 28(1)           | 49(2)           | 4(1)            | 6(1)            | 1(1)            |
| C(19)  | 37(2)           | 42(2)           | 59(2)           | -3(1)           | 16(1)           | -6(1)           |
| C(20)  | 50(2)           | 55(2)           | 62(2)           | 1(2)            | 27(2)           | -3(2)           |
| C(21)  | 35(2)           | 53(2)           | 70(2)           | 17(2)           | 17(2)           | -8(1)           |
| C(22)  | 38(2)           | 43(2)           | 64(2)           | 7(2)            | 9(2)            | -15(1)          |
| C(23)  | 24(1)           | 41(2)           | 45(2)           | 6(1)            | 3(1)            | -5(1)           |
| C(24)  | 23(1)           | 24(1)           | 50(2)           | -1(1)           | 3(1)            | 1(1)            |
| C(25)  | 28(1)           | 29(1)           | 52(2)           | 0(1)            | 8(1)            | -3(1)           |
| C(26)  | 44(2)           | 37(2)           | 60(2)           | 0(1)            | 19(2)           | -5(1)           |
| C(27)  | 29(2)           | 36(2)           | 80(2)           | -6(2)           | 16(2)           | -8(1)           |
| C(28)  | 23(1)           | 31(2)           | 72(2)           | -9(1)           | 3(1)            | -1(1)           |
| C(29)  | 26(1)           | 33(1)           | 39(2)           | 3(1)            | 9(1)            | -3(1)           |
| C(30)  | 47(2)           | 33(2)           | 54(2)           | 4(1)            | 3(2)            | -9(1)           |
| C(31)  | 56(2)           | 33(2)           | 61(2)           | 12(2)           | -2(2)           | -6(1)           |
| C(32)  | 39(2)           | 40(2)           | 48(2)           | 14(1)           | 1(1)            | 2(1)            |
| C(33)  | 28(1)           | 40(2)           | 36(2)           | 2(1)            | 9(1)            | -1(1)           |
| C(34)  | 26(1)           | 31(1)           | 37(2)           | 3(1)            | 10(1)           | 1(1)            |
| C(35)  | 33(1)           | 44(2)           | 37(2)           | -6(1)           | 7(1)            | -2(1)           |
| C(36)  | 28(1)           | 34(1)           | 40(2)           | -6(1)           | 5(1)            | -5(1)           |
| C(37)  | 41(2)           | 39(2)           | 69(2)           | -5(2)           | 22(2)           | -1(1)           |
| C(38)  | 60(2)           | 55(2)           | 86(3)           | -19(2)          | 45(2)           | -18(2)          |
| C(39)  | 66(2)           | 60(2)           | 56(2)           | -4(2)           | 25(2)           | -28(2)          |
| C(40)  | 56(2)           | 59(2)           | 63(2)           | 18(2)           | 9(2)            | -7(2)           |
| C(41)  | 39(2)           | 57(2)           | 41(2)           | 5(2)            | -2(1)           | -5(2)           |
| C(42)  | 45(4)           | 65(5)           | 38(3)           | 6(3)            | 4(3)            | 4(3)            |
| C(43)  | 48(4)           | 64(5)           | 57(5)           | 5(4)            | 1(3)            | 0(3)            |
| C(44)  | 41(4)           | 74(5)           | 73(5)           | -1(4)           | -3(3)           | -7(4)           |
| C(45)  | 32(3)           | 95(6)           | 60(5)           | 6(4)            | 8(3)            | -7(4)           |
| C(46)  | 35(4)           | 89(6)           | 60(5)           | 2(4)            | 7(3)            | -5(4)           |
| N(6)   | 38(3)           | 88(5)           | 53(4)           | -10(3)          | 6(3)            | 0(3)            |
| C(42A) | 29(3)           | 29(3)           | 37(3)           | 4(2)            | -4(2)           | -2(2)           |
| C(43A) | 37(3)           | 33(3)           | 44(3)           | -1(2)           | 3(3)            | 2(2)            |
| C(44A) | 45(3)           | 35(3)           | 50(4)           | -9(3)           | -4(3)           | 8(3)            |

|        |         |         |        |         |        |         |
|--------|---------|---------|--------|---------|--------|---------|
| C(45A) | 37(3)   | 43(4)   | 64(4)  | -5(3)   | -10(3) | -11(3)  |
| C(46A) | 41(3)   | 67(5)   | 54(4)  | 6(3)    | 5(3)   | -20(3)  |
| N(6A)  | 43(3)   | 67(4)   | 37(3)  | 2(3)    | 3(2)   | -18(3)  |
| N(7)   | 53(6)   | 22(4)   | 39(5)  | -8(4)   | 9(5)   | 7(4)    |
| C(51)  | 52(7)   | 7(4)    | 28(5)  | -7(4)   | 5(5)   | 10(5)   |
| C(52)  | 47(8)   | 32(7)   | 43(10) | 0(8)    | -7(7)  | 14(6)   |
| N(7A)  | 85(6)   | 101(7)  | 131(8) | 22(6)   | 40(6)  | 12(5)   |
| C(51A) | 59(5)   | 49(4)   | 71(5)  | 1(4)    | 7(4)   | 3(3)    |
| C(52A) | 64(6)   | 43(6)   | 42(6)  | -12(5)  | 15(5)  | -7(5)   |
| N(8)   | 131(15) | 129(16) | 50(9)  | 8(9)    | 36(9)  | -25(13) |
| C(55)  | 72(6)   | 74(6)   | 64(6)  | -13(5)  | 19(5)  | 9(5)    |
| C(56)  | 88(12)  | 83(12)  | 85(12) | -49(10) | 67(10) | -42(10) |

---

**Table S13.** Hydrogen coordinates ( $\times 10^4$ ) and isotropic displacement parameters ( $\text{\AA}^2 \times 10^{-3}$ ) for **2**.

|        | x     | y    | z    | U(eq) |
|--------|-------|------|------|-------|
| H(1)   | 2814  | 1957 | 3405 | 40    |
| H(4)   | 2968  | 4602 | 2080 | 38    |
| H(5)   | 4131  | 5881 | 1856 | 41    |
| H(6)   | 5643  | 6358 | 2236 | 44    |
| H(7)   | 6385  | 5719 | 2929 | 41    |
| H(8)   | 5792  | 4462 | 3444 | 37    |
| H(12)  | 2151  | 698  | 2564 | 39    |
| H(13)  | 711   | 58   | 2048 | 41    |
| H(14)  | -391  | 1679 | 1682 | 41    |
| H(16)  | 1375  | 4663 | 2352 | 36    |
| H(17A) | 159   | 5971 | 2153 | 43    |
| H(17B) | -613  | 6326 | 1690 | 43    |
| H(19)  | 728   | 4755 | 1086 | 54    |
| H(20)  | 2075  | 5564 | 761  | 64    |
| H(21)  | 2945  | 7497 | 1083 | 62    |
| H(22)  | 2450  | 8552 | 1704 | 58    |
| H(23A) | -894  | 3226 | 1209 | 45    |
| H(23B) | -1276 | 4766 | 1185 | 45    |
| H(25)  | -1476 | 3200 | 2240 | 43    |
| H(26)  | -3002 | 2528 | 2442 | 55    |
| H(27)  | -4442 | 2450 | 1860 | 57    |
| H(28)  | -4304 | 3030 | 1111 | 52    |
| H(30)  | 4450  | 663  | 3798 | 55    |
| H(31)  | 5443  | -44  | 4485 | 62    |
| H(32)  | 6282  | 1520 | 5005 | 52    |
| H(32A) | 6282  | 1520 | 5005 | 52    |
| H(34)  | 5156  | 4581 | 4139 | 37    |
| H(35A) | 6465  | 6134 | 5113 | 45    |
| H(35B) | 5466  | 5790 | 4755 | 45    |
| H(37)  | 7751  | 4731 | 4443 | 58    |
| H(38)  | 8420  | 5708 | 3839 | 76    |
| H(39)  | 7727  | 7705 | 3494 | 71    |
| H(40)  | 6370  | 8649 | 3754 | 71    |
| H(41A) | 6681  | 4516 | 5610 | 56    |
| H(41B) | 6487  | 2945 | 5477 | 56    |
| H(41C) | 7001  | 2821 | 5391 | 56    |
| H(41D) | 6296  | 3878 | 5593 | 56    |
| H(43)  | 8300  | 5134 | 5879 | 69    |
| H(44)  | 10031 | 4833 | 5907 | 77    |
| H(45)  | 10558 | 3068 | 5481 | 75    |
| H(46)  | 9363  | 1629 | 5040 | 74    |
| H(43A) | 7290  | 4901 | 6228 | 46    |
| H(44A) | 8733  | 6041 | 6584 | 54    |
| H(45A) | 9977  | 6504 | 6145 | 61    |
| H(46A) | 9763  | 5777 | 5390 | 65    |
| H(52A) | 2637  | 1000 | 5002 | 64    |
| H(52B) | 3521  | 1411 | 4735 | 64    |
| H(52C) | 2869  | 75   | 4585 | 64    |
| H(52D) | 2684  | 1895 | 4332 | 73    |
| H(52E) | 2860  | 294  | 4408 | 73    |
| H(52F) | 3430  | 1350 | 4779 | 73    |
| H(56A) | -604  | 7275 | 5011 | 119   |
| H(56B) | 184   | 7490 | 5480 | 119   |
| H(56C) | 421   | 6436 | 5099 | 119   |

**Table S14.** Torsion angles [°] for **2**.

|                         |           |                             |           |
|-------------------------|-----------|-----------------------------|-----------|
| C(10)-C(1)-C(2)-C(3)    | 1.3(3)    | N(3)-C(24)-C(25)-C(26)      | -1.2(4)   |
| C(10)-C(1)-C(2)-C(11)   | 175.7(2)  | C(23)-C(24)-C(25)-C(26)     | -179.5(3) |
| C(1)-C(2)-C(3)-C(4)     | 175.3(3)  | C(24)-C(25)-C(26)-C(27)     | 1.0(4)    |
| C(11)-C(2)-C(3)-C(4)    | 1.0(4)    | C(25)-C(26)-C(27)-C(28)     | 0.0(5)    |
| C(1)-C(2)-C(3)-C(9)     | -0.3(3)   | C(24)-N(3)-C(28)-C(27)      | 0.8(4)    |
| C(11)-C(2)-C(3)-C(9)    | -174.5(2) | C(26)-C(27)-C(28)-N(3)      | -1.0(5)   |
| C(2)-C(3)-C(4)-C(5)     | -174.3(3) | C(1)-C(10)-C(29)-C(30)      | 43.5(4)   |
| C(9)-C(3)-C(4)-C(5)     | 0.4(5)    | C(9)-C(10)-C(29)-C(30)      | -129.1(3) |
| C(3)-C(4)-C(5)-C(6)     | 1.2(5)    | C(1)-C(10)-C(29)-C(34)      | -137.6(3) |
| C(4)-C(5)-C(6)-C(7)     | -0.4(5)   | C(9)-C(10)-C(29)-C(34)      | 49.8(4)   |
| C(5)-C(6)-C(7)-C(8)     | -1.2(5)   | C(34)-C(29)-C(30)-C(31)     | -1.0(5)   |
| C(6)-C(7)-C(8)-C(9)     | 0.5(5)    | C(10)-C(29)-C(30)-C(31)     | 177.9(3)  |
| C(7)-C(8)-C(9)-C(10)    | 174.8(3)  | C(29)-C(30)-C(31)-C(32)     | 0.7(5)    |
| C(7)-C(8)-C(9)-C(3)     | 1.7(5)    | C(30)-C(31)-C(32)-C(33)     | -0.8(5)   |
| C(4)-C(3)-C(9)-C(8)     | -2.3(4)   | C(35)-N(4)-C(33)-C(34)      | 6.5(4)    |
| C(2)-C(3)-C(9)-C(8)     | 173.2(2)  | C(41)-N(4)-C(33)-C(34)      | 167.2(3)  |
| C(4)-C(3)-C(9)-C(10)    | -176.4(3) | C(35)-N(4)-C(33)-C(32)      | -174.5(3) |
| C(2)-C(3)-C(9)-C(10)    | -0.9(3)   | C(41)-N(4)-C(33)-C(32)      | -13.9(4)  |
| C(2)-C(1)-C(10)-C(9)    | -1.9(3)   | C(31)-C(32)-C(33)-N(4)      | -177.9(3) |
| C(2)-C(1)-C(10)-C(29)   | -175.7(2) | C(31)-C(32)-C(33)-C(34)     | 1.1(4)    |
| C(8)-C(9)-C(10)-C(1)    | -172.5(3) | C(30)-C(29)-C(34)-C(33)     | 1.4(4)    |
| C(3)-C(9)-C(10)-C(1)    | 1.7(3)    | C(10)-C(29)-C(34)-C(33)     | -177.5(2) |
| C(8)-C(9)-C(10)-C(29)   | 1.1(4)    | N(4)-C(33)-C(34)-C(29)      | 177.5(3)  |
| C(3)-C(9)-C(10)-C(29)   | 175.4(2)  | C(32)-C(33)-C(34)-C(29)     | -1.5(4)   |
| C(1)-C(2)-C(11)-C(16)   | 132.0(3)  | C(33)-N(4)-C(35)-C(36)      | -74.5(3)  |
| C(3)-C(2)-C(11)-C(16)   | -54.7(4)  | C(41)-N(4)-C(35)-C(36)      | 124.3(3)  |
| C(1)-C(2)-C(11)-C(12)   | -49.4(4)  | C(40)-N(5)-C(36)-C(37)      | -1.0(5)   |
| C(3)-C(2)-C(11)-C(12)   | 123.8(3)  | C(40)-N(5)-C(36)-C(35)      | 178.4(3)  |
| C(16)-C(11)-C(12)-C(13) | 0.6(4)    | N(4)-C(35)-C(36)-N(5)       | 156.9(3)  |
| C(2)-C(11)-C(12)-C(13)  | -178.0(2) | N(4)-C(35)-C(36)-C(37)      | -23.7(4)  |
| C(11)-C(12)-C(13)-C(14) | -0.1(4)   | N(5)-C(36)-C(37)-C(38)      | 0.5(5)    |
| C(12)-C(13)-C(14)-C(15) | 0.1(4)    | C(35)-C(36)-C(37)-C(38)     | -178.8(3) |
| C(17)-N(1)-C(15)-C(14)  | -174.1(3) | C(36)-C(37)-C(38)-C(39)     | 0.3(5)    |
| C(23)-N(1)-C(15)-C(14)  | -8.0(4)   | C(37)-C(38)-C(39)-C(40)     | -0.6(6)   |
| C(17)-N(1)-C(15)-C(16)  | 6.7(4)    | C(36)-N(5)-C(40)-C(39)      | 0.7(5)    |
| C(23)-N(1)-C(15)-C(16)  | 172.8(2)  | C(38)-C(39)-C(40)-N(5)      | 0.1(6)    |
| C(13)-C(14)-C(15)-N(1)  | -179.7(3) | C(33)-N(4)-C(41)-C(42)      | 102.1(4)  |
| C(13)-C(14)-C(15)-C(16) | -0.5(4)   | C(35)-N(4)-C(41)-C(42)      | -96.9(5)  |
| C(12)-C(11)-C(16)-C(15) | -1.1(4)   | C(33)-N(4)-C(41)-C(42A)     | 152.8(3)  |
| C(2)-C(11)-C(16)-C(15)  | 177.5(2)  | C(35)-N(4)-C(41)-C(42A)     | -46.2(4)  |
| N(1)-C(15)-C(16)-C(11)  | -179.8(2) | N(4)-C(41)-C(42)-N(6)       | -63.3(7)  |
| C(14)-C(15)-C(16)-C(11) | 1.0(4)    | N(4)-C(41)-C(42)-C(43)      | 113.3(6)  |
| C(15)-N(1)-C(17)-C(18)  | 68.7(3)   | N(6)-C(42)-C(43)-C(44)      | 0.2(12)   |
| C(23)-N(1)-C(17)-C(18)  | -97.7(3)  | C(41)-C(42)-C(43)-C(44)     | -176.3(6) |
| C(22)-N(2)-C(18)-C(19)  | -0.1(4)   | C(42)-C(43)-C(44)-C(45)     | -0.6(12)  |
| C(22)-N(2)-C(18)-C(17)  | -179.2(3) | C(43)-C(44)-C(45)-C(46)     | -0.1(12)  |
| N(1)-C(17)-C(18)-N(2)   | -155.9(2) | C(44)-C(45)-C(46)-N(6)      | 1.2(13)   |
| N(1)-C(17)-C(18)-C(19)  | 25.0(4)   | C(43)-C(42)-N(6)-C(46)      | 0.8(11)   |
| N(2)-C(18)-C(19)-C(20)  | 0.4(5)    | C(41)-C(42)-N(6)-C(46)      | 177.5(6)  |
| C(17)-C(18)-C(19)-C(20) | 179.4(3)  | C(45)-C(46)-N(6)-C(42)      | -1.5(12)  |
| C(18)-C(19)-C(20)-C(21) | -0.2(5)   | N(4)-C(41)-C(42A)-N(6A)     | -46.1(6)  |
| C(19)-C(20)-C(21)-C(22) | -0.2(5)   | N(4)-C(41)-C(42A)-C(43A)    | 136.3(4)  |
| C(18)-N(2)-C(22)-C(21)  | -0.4(5)   | N(6A)-C(42A)-C(43A)-C(44A)  | -1.4(9)   |
| C(20)-C(21)-C(22)-N(2)  | 0.5(5)    | C(41)-C(42A)-C(43A)-C(44A)  | 176.2(5)  |
| C(15)-N(1)-C(23)-C(24)  | 85.9(3)   | C(42A)-C(43A)-C(44A)-C(45A) | 1.8(9)    |
| C(17)-N(1)-C(23)-C(24)  | -107.7(3) | C(43A)-C(44A)-C(45A)-C(46A) | -0.9(10)  |
| C(28)-N(3)-C(24)-C(25)  | 0.3(4)    | C(44A)-C(45A)-C(46A)-N(6A)  | -0.5(11)  |
| C(28)-N(3)-C(24)-C(23)  | 178.7(2)  | C(43A)-C(42A)-N(6A)-C(46A)  | 0.0(9)    |
| N(1)-C(23)-C(24)-N(3)   | 166.0(2)  | C(41)-C(42A)-N(6A)-C(46A)   | -177.6(5) |
| N(1)-C(23)-C(24)-C(25)  | -15.5(4)  | C(45A)-C(46A)-N(6A)-C(42A)  | 1.0(11)   |

## References

1. V. V. Kouznetsov, L. Y. Vargas Méndez, M. Sortino, Y. Vásquez, M. P. Gupta, M. Freile, R. D. Enriz and S. A. Zacchino, *Bioorg. Med. Chem.*, 2008, **16**, 794–809.
2. Y. Wang, H. Liu, X. Zhang, Z. Zhang and D. Huang, *Org. Biomol. Chem.*, 2017, **15**, 9164–9168.
3. S. Son and K. Yamada, *Bull. Chem. Soc. Jpn.*, 2013, **86**, 37–44.
4. M. Macias-Contreras, K. L. Daykin, J. T. Simmons, J. R. Allen, Z. S. Hooper, W. Davidson and L. Zhu, *Org. Biomol. Chem.*, 2017, **15**, 9139–9148.
5. C. Gwizdala, D. P. Kennedy, and S. C. Burdette, *Chem. Commun.*, 2009, 6967–6969.
6. C. Gwizdala, C. V. Singh, T. R. Friss, J. C. MacDonald, and S. C. Burdette, *Dalton Trans.*, 2012, **41**, 8162–8174.
7. H. Salman, Y. Abraham, S. Tal, S. Meltzman, M. Kapon, N. Tessler, S. Speiser and Y. Eichen, *Eur. J. Org. Chem.*, 2005, 2207–2212.
